# Supplementary material for: Monitoring Early Response to Anti-Angiogenic Therapy: Diffusion-Weighted Magnetic Resonance Imaging and Volume Measurements in Colon Carcinoma Xenografts
Source: PLoS One. 2014 Sep 15;9(9):e106970. doi: 10.1371/journal.pone.0106970 (PMC4164617; doi:10.1371/journal.pone.0106970)
Supplement: Table S1 — Voxelwise calculated ADC values for each animal and measurement. (XLSX) [file pone.0106970.s001.xlsx]

## Sheet: Tabelle1
Table S1: Voxelwise calculated ADC values for each animal and measurement
Animal No.	1		2		3		4		5		6		7		8		9		10		11		12		13		14		15		16		17		18		19		20		21		22		23
Group	Therapy		Therapy		Therapy		Therapy		Therapy		Therapy		Therapy		Therapy		Therapy		Therapy		Therapy		Therapy		Control		Control		Control		Control		Control		Control		Control		Control		Control		Control		Control
Measurement	Baseline	Follow-Up	Baseline	Follow-Up	Baseline	Follow-Up	Baseline	Follow-Up	Baseline	Follow-Up	Baseline	Follow-Up	Baseline	Follow-Up	Baseline	Follow-Up	Baseline	Follow-Up	Baseline	Follow-Up	Baseline	Follow-Up	Baseline	Follow-Up	Baseline	Follow-Up	Baseline	Follow-Up	Baseline	Follow-Up	Baseline	Follow-Up	Baseline	Follow-Up	Baseline	Follow-Up	Baseline	Follow-Up	Baseline	Follow-Up	Baseline	Follow-Up	Baseline	Follow-Up	Baseline	Follow-Up
Voxel Count	333	428	801	351	1957	2721	654	610	445	120	2156	2818	2714	4475	2353	4224	642	1199	543	488	389	515	796	988	487	766	1035	1596	406	819	635	1015	224	440	256	362	504	928	442	866	303	409	698	969	604	751
ADC Values [10-3mm²/s]	0.631866	0.692085	1.75811	1.08802	0.695166	0.797063	0.547076	0.925543	0.703374	0.725426	1.03926	0.769655	0.66388	0.659547	0.608362	0.681311	0.760189	0.779611	1.2365	1.19704	0.829002	0.933223	0.864319	1.09275	0.88631	0.966414	0.721601	1.05778	0.668091	0.896938	0.798158	1.21842	0.762831	0.839378	0.806158	0.912236	1.03185	1.08981	1.02728	0.743109	0.847118	0.848897	1.02258	0.739089	0.973193	0.75907
	0.619517	0.768145	1.69692	1.01193	0.69784	0.872623	0.51967	0.892114	0.717651	0.853857	1.08094	0.743669	0.649046	0.598986	0.675528	0.651581	0.824866	0.781114	1.2234	0.940154	0.928968	0.953908	0.895089	1.01835	0.908403	0.886778	0.737895	0.92626	0.672775	0.891087	0.831661	0.761767	0.750873	0.821441	0.788967	0.90967	0.935309	1.0419	1.18452	0.827829	0.895175	0.850973	0.849181	0.792711	0.884298	0.820541
	0.713507	0.79889	1.76026	0.995504	0.724707	0.871977	0.513744	0.795007	0.683185	0.957305	1.02381	0.668679	0.605584	0.585099	0.800666	0.658894	0.895801	0.79776	1.17681	1.0216	1.06792	0.824568	0.94403	0.981082	0.72488	0.801265	0.675203	0.80925	0.716008	0.748561	0.780592	0.725535	0.757941	0.816056	0.842406	0.873929	0.891155	1.00985	1.17633	0.861296	0.790816	0.793311	0.823	0.767644	1.02751	0.956388
	0.626804	0.771901	1.65665	0.948121	0.735188	0.857184	0.561844	0.841523	0.686374	1.0145	0.956216	0.648119	0.538162	0.638823	0.596093	0.629739	0.890638	0.881868	1.13794	1.09236	0.864851	0.866572	0.94048	1.01164	0.747356	0.877836	0.641864	0.717563	0.769382	0.772679	0.691779	0.782055	0.883746	0.936999	0.87	0.773665	0.888085	1.03666	1.02078	0.790593	0.8509	0.819691	0.870107	0.800923	0.911974	1.31971
	0.632898	0.732692	1.38903	0.920584	0.701565	0.844916	0.54478	0.821749	0.681013	1.02757	0.864718	0.797446	0.494767	0.764055	0.596128	0.591137	0.921057	0.787943	1.11204	0.925011	0.811308	0.990757	0.800185	1.02056	0.787167	0.842773	0.629608	1.05209	0.60542	0.803837	0.677946	0.92791	0.977559	0.862939	0.740051	0.801331	0.871213	1.05176	1.12633	0.82647	0.898325	0.848028	1.04707	0.822451	1.04109	0.992913
	0.628129	0.79436	1.02438	0.926662	0.669373	0.891859	0.534953	0.761831	0.664349	0.947415	0.742535	0.903136	0.51018	0.6229	0.653139	0.659725	1.00414	0.825338	1.10118	0.884716	0.862343	0.802313	0.783229	0.946631	0.848712	0.828541	0.812127	0.926563	0.667398	0.704581	0.735361	1.14184	0.835868	0.758113	0.791005	0.832911	1.10202	1.01397	1.16213	0.942842	0.708569	0.711055	0.859727	0.778454	0.847825	0.796691
	0.652366	0.906011	1.65335	0.903063	0.669628	0.91301	0.559064	0.760193	0.676987	0.994097	1.01759	0.932526	0.54934	0.610387	0.740981	0.628446	0.805947	0.921101	1.04738	0.907869	0.861194	0.961937	0.849714	0.95663	0.630513	0.787321	0.673665	0.830415	0.747018	0.723805	0.817245	1.32517	0.774587	0.832028	0.847713	0.829167	1.00961	0.931205	1.06597	0.984633	0.785628	0.776528	0.827197	0.744983	0.944179	0.832554
	0.663812	0.891187	1.53762	0.87077	0.690712	0.912578	0.567144	0.795638	0.673074	0.667638	1.04203	0.902708	0.589657	0.624703	0.815396	0.595073	0.848835	0.807121	1.01862	0.950169	1.20253	1.18798	0.880114	1.00543	0.607455	0.770976	0.631285	0.7438	0.82002	0.753795	0.911433	1.36702	0.748204	0.837014	0.854922	0.72852	0.929955	0.85783	1.01041	0.884352	0.867763	0.858896	0.881583	0.761976	0.907834	0.977747
	0.794928	0.83524	1.3137	0.890231	0.715388	0.890352	0.57246	0.788247	0.6624	0.817286	0.953479	0.859297	0.614265	0.69566	0.63501	0.479323	0.889926	0.853496	1.04547	1.03063	0.8863	1.20592	0.892747	1.0584	0.63737	0.722286	0.627212	0.672402	0.846566	0.731857	0.749153	0.849846	1.22006	0.816447	0.675561	0.714125	0.893571	0.866073	1.02748	0.853148	0.631552	0.652555	0.935219	0.83968	0.787299	1.15208
	0.790403	0.779054	1.0372	0.86921	0.678301	0.936939	0.548403	0.762121	0.665367	0.929144	0.900993	0.877049	0.674819	0.826851	0.596588	0.683748	0.858591	0.927546	0.937696	0.895337	0.822383	1.12803	0.813547	0.970171	0.686867	0.74644	0.634188	0.631147	0.822061	0.705101	0.65767	0.745854	0.883004	0.659451	0.786995	0.76334	0.882334	0.942483	1.06003	0.908362	0.714709	0.739713	1.04672	0.822049	0.875754	1.56461
	0.738064	0.958453	0.794943	0.846566	0.654674	0.956045	0.556799	0.728993	0.667482	1.01327	0.878085	1.01265	0.725584	0.836037	0.621485	0.620173	0.839155	0.832566	0.964511	0.858941	0.64579	1.00951	0.749242	0.928768	0.766186	0.770835	0.779732	0.631899	0.780536	0.716551	0.650497	0.722243	0.755659	0.744878	0.841359	0.785806	0.890403	0.943653	1.01619	1.00856	0.784283	0.843482	0.884031	0.784209	0.873115	1.33932
	0.678416	1.00833	1.44991	0.8355	0.653446	0.959861	0.565159	0.765472	0.643623	1.06782	0.830993	0.645601	0.720732	0.859134	0.702318	0.572231	0.89099	0.885211	1.03811	0.851834	0.991276	0.933565	0.775116	0.956975	0.695801	0.764673	0.643653	1.02407	0.564049	0.748598	0.708305	0.783669	0.715445	0.773174	0.838598	0.792307	0.900323	0.951002	0.931776	1.16606	0.607558	0.66043	0.865031	0.727003	0.753319	0.990848
	0.615695	0.966837	1.37401	0.822502	0.671562	0.909718	0.638131	0.766764	0.691113	1.09448	0.736052	0.767177	0.669117	0.685553	0.7955	0.874629	0.967684	0.92048	0.689057	0.871117	1.27994	0.921982	0.785764	0.992517	0.556094	0.774138	0.617564	0.862372	0.66242	0.767741	0.800487	0.947791	0.717245	0.774013	0.770797	0.822654	1.02719	0.959041	0.949999	0.999275	0.677794	0.725624	0.9115	0.725074	0.839943	0.757584
	0.642642	0.892482	1.2159	0.811506	0.695857	0.965366	0.561799	0.755412	0.671032	1.10195	0.622126	0.891833	0.572468	0.603218	0.667253	0.706252	0.821222	0.922402	0.648479	0.93856	0.909083	1.36258	0.795239	1.00158	0.535151	0.634627	0.636111	0.78423	0.777046	0.732813	0.852609	1.18647	1.13977	0.614185	0.760944	0.715724	0.943425	0.977018	0.959134	0.911797	0.744733	0.810695	0.973464	0.849201	0.858512	0.782756
	0.677679	0.832786	1.02246	0.966839	0.701233	0.993849	0.575856	0.727779	0.662381	1.07707	1.14502	1.02861	0.560891	0.638927	0.611379	0.62065	0.859115	0.790681	0.649283	0.940648	0.841247	1.12909	0.85797	0.929046	0.560078	0.633273	0.662264	0.72991	0.839845	0.729041	0.722861	1.38122	0.815583	0.694767	0.822649	0.716891	0.892704	0.952155	0.86926	0.902072	0.662504	0.951141	1.06176	0.810899	0.71592	1.00588
	0.755157	1.03351	0.842923	0.994451	0.660769	1.00219	0.579143	0.691944	0.674325	1.0071	1.0304	1.14049	0.566904	0.616262	0.633752	0.573525	0.867444	0.813142	0.672104	0.853731	0.876384	0.851197	0.955042	0.91371	0.613832	0.679688	0.801902	0.680523	0.829205	0.765253	0.670492	1.38148	0.703292	0.726804	0.829244	0.755402	0.861368	0.900593	0.904755	0.952343	0.70381	0.640201	0.959888	0.817207	0.79519	1.22895
	0.888585	1.08243	0.737685	0.984068	0.64221	0.998407	0.576611	0.734929	0.696817	0.88552	0.916536	1.15749	0.587837	0.637355	0.713069	1.58409	0.834299	0.820274	0.823422	0.836609	0.810324	1.13642	0.921275	0.94008	0.702068	0.722455	0.668611	0.637152	0.793285	0.814509	0.687623	1.10985	0.688517	0.726194	0.778704	0.767833	0.879612	0.85686	1.15431	0.987478	0.73449	0.697089	0.961	0.789767	0.83793	1.4107
	0.769479	1.03222	1.23438	0.998624	0.643942	0.93212	0.580042	0.737724	0.704887	0.986926	0.892432	1.0833	0.596776	0.675113	0.822693	1.59316	0.78612	0.789874	0.727226	0.832726	1.34944	0.94942	0.805317	0.95283	0.847436	0.741427	0.653863	0.611806	0.79218	0.845021	0.753386	0.861148	0.713903	0.526242	0.706433	0.767994	0.917757	0.868487	1.13782	1.2257	0.740331	0.733518	0.997258	0.723576	0.785336	1.25127
	0.829538	0.947317	1.19907	1.02306	0.66258	0.999879	0.627208	0.727512	0.704091	1.05795	0.906602	1.00135	0.594019	0.746949	0.703205	1.26319	0.795401	0.811899	0.711962	0.865448	0.953094	1.05931	0.86087	0.940665	0.869709	0.854041	0.686701	0.625642	0.787461	0.802989	0.8277	0.761312	0.7726	0.678219	0.783342	0.777388	0.940974	0.95877	1.0108	0.988898	0.801874	0.78842	1.01309	0.717409	0.832609	0.947222
	0.809566	0.889523	1.09401	1.04723	0.689543	1.05057	0.573052	0.696783	0.678292	1.10764	0.896229	0.980921	0.558203	0.839324	0.667373	0.943315	0.876471	0.901393	0.723772	0.913303	0.884081	0.967878	0.76192	0.901594	0.642919	0.643358	0.725537	0.675182	0.584064	0.765331	0.762053	0.739866	0.675088	0.703141	0.817637	0.804848	0.968849	0.890081	0.780165	0.942438	0.808243	0.841044	1.11969	0.746656	0.813388	0.69589
	0.714133	1.06203	0.966983	1.05668	0.705499	1.05944	0.586368	0.647507	0.68243	1.14068	0.804253	1.073	0.588261	0.888953	0.699996	0.735925	0.856621	0.865594	0.748757	0.838814	0.91747	0.918257	0.707694	1.04413	0.534113	0.568594	0.898107	1.13766	0.542317	0.818916	0.697448	0.795871	0.679274	0.690026	0.731382	0.745418	0.880663	1.00472	0.987873	0.963701	0.782427	0.669536	1.07502	0.756531	0.858375	0.704204
	0.699097	1.12983	0.847826	1.06896	0.680589	1.04332	0.595255	0.691958	0.707723	1.15832	0.65442	0.796167	0.685252	0.816227	0.778854	0.63606	0.853132	0.796583	0.802734	0.786935	1.06272	0.897493	0.680111	0.893735	0.500645	0.584119	0.754646	0.87125	0.660014	0.886417	0.701678	0.951466	0.745514	0.635228	0.802759	0.727803	0.836156	0.955166	1.00612	1.00465	0.763948	0.712081	1.09358	0.771949	0.886016	0.974679
	0.664851	1.08633	0.76886	1.10565	0.648359	1.02489	0.595229	0.661979	0.746063	1.13583	0.532822	0.750426	0.765914	0.69001	0.884342	1.58343	0.816415	0.793801	1.04575	0.811821	0.991816	0.913215	0.696747	0.880257	0.514715	0.634165	0.745779	0.728094	0.784945	0.934816	0.757038	1.18686	0.669904	0.694358	0.89759	0.770538	0.835975	0.93691	0.993615	1.03691	0.804325	0.742472	1.1215	0.75944	0.87987	1.29687
	0.632985	0.98469	1.06143	1.12769	0.634832	1.0959	0.591236	0.674127	0.771732	1.05826	1.14271	0.728131	0.767137	0.6584	0.769382	1.75464	0.768028	0.813473	0.813526	0.846026	0.918652	1.79599	0.771653	0.889114	0.567139	0.689781	0.789382	0.66799	0.826699	0.920778	0.833948	1.35803	0.677149	0.719299	0.825462	0.773088	0.886445	0.919425	0.922957	1.03443	0.773397	0.787404	1.18697	0.718786	0.911743	1.42479
	0.707845	0.570277	1.03019	1.13025	0.637092	1.13235	0.623669	0.588925	0.757805	0.901222	0.996124	0.827593	0.705841	0.792085	0.815413	1.64935	0.756369	0.883574	0.744746	0.89708	0.981389	1.62055	0.883085	0.8837	0.656881	0.725924	0.832998	0.640254	0.783903	0.805739	0.875177	1.1072	0.781204	0.756562	0.776365	0.753522	0.935318	0.92347	0.852537	1.07844	0.778337	0.888083	1.19362	0.726218	0.931178	1.09641
	0.783743	0.551731	0.956569	1.06652	0.661277	1.12329	0.790819	0.628219	0.770427	0.930352	0.912028	0.879609	0.647129	0.807176	0.8878	1.32741	0.840976	0.978442	0.749395	0.937055	1.11937	1.28475	0.892522	0.87111	0.788052	0.701055	0.911877	0.624203	0.753842	0.867089	0.65173	0.865893	0.770346	0.77237	0.801492	0.761875	0.945558	0.907662	0.903667	1.15108	0.814799	0.658607	1.22101	0.652195	0.891836	1.19934
	0.921148	0.610857	0.873858	1.1457	0.696428	1.15546	0.597426	0.622215	0.722602	1.03388	0.91792	0.973662	0.632569	0.645654	0.958397	0.983523	0.85628	0.870759	0.772937	0.741357	1.05056	1.1049	0.798939	0.874333	0.92615	0.576263	0.903455	0.60785	0.789132	0.938296	0.731567	0.773655	0.824709	0.629113	0.858072	0.809831	0.852411	0.886503	0.954032	1.15164	0.778457	0.705052	1.09481	0.670237	0.967446	1.11665
	0.809014	0.66253	0.805587	1.18987	0.732113	1.17959	0.602695	0.594625	0.702112	1.09569	0.97125	1.15602	0.645298	0.619359	0.893899	0.765177	0.816457	0.859696	0.799588	0.729989	0.981984	1.04834	0.701445	0.964976	0.788166	0.545345	0.954038	0.599302	0.847697	0.995801	0.828515	0.748484	0.815717	0.660448	0.909221	0.783583	0.789791	0.865473	0.974779	1.18481	0.79195	0.750366	1.2559	0.69809	0.974647	0.878996
	0.850293	0.632123	0.766428	1.18333	0.667428	1.67673	0.613592	0.539804	0.718926	1.1411	0.984074	1.36798	0.645238	0.641811	0.949192	0.667119	0.773228	0.836128	0.852845	0.786746	0.884851	0.993834	0.685607	0.866965	0.621978	0.567531	1.09742	0.615456	0.602688	1.00956	0.90712	0.792939	0.731184	0.663436	1.03644	0.77497	0.815338	0.876701	0.760849	0.936757	0.793142	0.75792	1.04632	0.709818	0.861398	0.638177
	0.820005	0.611262	0.942669	1.10399	0.662306	1.47661	0.620269	0.527247	0.75932	1.1774	0.892864	1.39	0.62219	0.677375	0.981463	1.51762	0.77983	0.804653	0.99876	0.795483	0.86653	0.931252	0.796981	0.854253	0.538419	0.612928	1.15014	0.671215	0.54675	0.804383	0.888344	0.945364	0.807492	0.585032	0.851184	0.769129	0.896044	0.894256	0.837282	1.03448	0.800209	0.901869	1.10919	0.714326	0.980343	0.643804
	0.765651	0.604894	0.891623	1.15126	0.620516	1.16075	0.610789	1.11262	0.806426	1.1988	0.740213	1.2068	0.672028	0.727587	0.982048	1.67457	0.867611	0.807756	0.807868	0.902598	0.929838	0.895699	0.67253	0.840415	0.498446	0.668209	0.87371	0.731284	0.657126	0.914338	0.696385	1.14595	0.85437	0.649404	0.726272	0.750691	0.927365	1.02929	0.910242	1.10672	0.796285	0.633393	1.02182	0.756401	0.995743	0.952125
	0.715572	0.639072	0.825995	1.22789	0.625921	1.0016	0.594774	0.995752	0.832687	1.18108	0.606423	1.00476	0.596395	0.782633	1.21387	1.7058	0.859512	0.848004	0.685823	0.928165	0.979797	0.880348	0.623326	0.818183	0.496857	0.737389	0.853227	0.751857	0.766494	0.973921	0.785778	1.12063	0.84595	0.687661	0.75671	0.734121	0.928845	1.09502	0.958026	1.13115	0.795859	0.686632	0.945779	0.621124	1.00706	1.34745
	0.694022	0.701441	0.777616	1.22277	0.630647	0.969659	0.607692	0.758434	0.837313	1.09118	0.567271	0.901714	0.560883	0.815245	1.12453	1.58034	0.811694	0.926014	0.770342	0.656888	0.971998	0.880592	0.646607	0.814795	0.541739	0.600936	0.810814	1.0506	0.778338	1.0173	0.884376	0.871904	0.759461	0.732538	0.775351	0.763259	0.808739	1.02232	0.727684	0.837365	1.01057	0.74873	0.939095	0.606095	1.04182	1.5589
	0.668505	0.752564	0.757998	1.14417	0.657245	0.971014	0.741783	1.07395	0.813059	1.05598	0.607392	0.955931	0.590223	0.748347	1.0111	1.30384	0.816331	0.861479	0.745722	0.687279	1.12949	0.905835	0.733028	0.851325	0.627517	0.549381	0.795146	0.7777	0.719415	1.04353	0.823276	0.772109	0.825872	0.602882	0.811294	0.834376	0.892356	0.975143	0.792791	0.849646	1.04553	0.826268	1.08837	0.632971	0.906647	0.917556
	0.746697	0.751518	0.759249	1.14434	0.703558	0.941607	1.08367	0.994911	0.76485	1.12672	1.1867	0.823537	0.690525	0.746236	0.888981	0.988319	0.905391	0.847037	0.841151	0.690483	1.08305	1.79936	0.814959	0.927572	0.743238	0.547862	0.783382	0.643238	0.710089	0.963698	0.762911	0.737465	0.879003	0.587318	0.896784	0.808489	0.920757	0.929089	0.871167	0.914074	1.02366	0.580758	1.16655	0.65344	0.834867	1.02469
	0.829126	0.693686	0.859629	1.22374	0.755522	0.907441	0.647439	0.846074	0.74541	1.17269	1.1124	0.864494	0.774535	0.792208	0.792325	0.77982	0.862851	0.834502	0.896167	0.831574	1.02139	1.82218	0.861615	0.867946	0.867123	0.576315	0.790878	0.586961	0.779763	0.991996	0.741519	0.76765	0.775226	0.690037	0.90428	0.776028	1.15047	0.91173	0.911311	0.997352	0.990068	0.613716	1.27342	0.713482	0.978206	0.983615
	0.847299	0.688359	0.795855	1.22361	0.626815	0.873089	0.647364	0.63439	0.762797	1.20649	0.96633	0.920067	0.775131	0.961237	1.04314	0.688659	0.833109	0.816197	0.979118	0.84166	0.942341	1.46479	0.822507	0.853554	0.951898	0.619305	0.776803	0.570438	0.882453	1.00818	0.71976	0.855543	0.823483	0.729157	0.797993	0.742628	1.29881	0.897545	0.89625	1.03993	1.01844	0.672035	1.05925	0.774564	0.964638	0.807179
	0.866952	0.651594	0.739005	1.15107	0.636998	0.859067	0.654267	0.367988	0.808857	1.22246	0.890345	0.975099	0.724703	0.796473	1.00131	1.47446	0.717057	0.80042	0.824605	0.855527	0.860655	1.18622	0.769889	0.820779	0.72343	0.667528	0.742778	0.581186	0.952961	1.01348	1.02143	0.851954	0.852235	0.776966	0.770283	0.72152	1.07525	0.873198	0.754067	1.05575	1.04168	0.738115	1.05459	0.616065	0.917949	0.586261
	0.827301	0.632937	0.72124	0.995209	0.623484	1.47676	0.651768	0.942267	0.852596	1.20214	0.902381	0.993586	0.692158	0.640615	0.945162	1.54141	0.696991	0.808066	0.773725	0.587093	0.857854	0.981564	0.780315	0.782395	0.613999	0.617224	0.748288	0.590358	0.637511	0.992652	1.01584	0.717857	0.731972	0.863919	0.780133	0.734326	1.10189	0.865029	0.82452	0.823773	1.00421	0.825493	0.901439	0.6084	0.865255	0.601369
	0.772923	0.65954	0.744099	1.13531	0.609326	1.14561	0.626591	0.999139	0.882049	1.10667	0.965769	0.991536	0.70187	0.606478	0.870123	1.57951	0.554828	0.842228	0.787987	0.650978	0.904264	0.857393	0.80479	0.776094	0.55194	0.555338	0.792081	0.592142	0.57441	0.959207	0.836465	1.04839	0.749266	0.660961	0.786441	0.792442	1.1152	0.86646	0.868772	0.793653	0.862137	0.568397	1.12941	0.615218	0.811346	0.947951
	0.736276	0.720347	0.809208	1.19014	0.616943	0.9541	0.589598	0.95979	0.898343	1.14145	1.00707	1.05097	0.708085	0.617994	0.808838	1.56721	0.639163	0.857428	0.829666	0.742007	0.940836	0.779501	0.646207	0.832201	0.509927	0.545254	0.7123	0.605758	0.654534	0.92778	0.734862	0.938651	0.530018	0.670382	0.803819	0.85956	1.16824	0.935881	0.884867	0.834965	1.02569	0.616676	1.19195	0.700953	0.824185	1.34756
	0.729697	0.777474	0.751386	1.18318	0.646177	0.866729	0.584446	0.868777	0.882265	1.20356	0.954603	1.2418	0.684838	0.642038	0.907287	1.43969	0.731978	0.772023	0.880453	0.776652	0.923478	0.780508	0.65896	0.900593	0.495385	0.568554	0.711817	0.649294	0.721353	0.993991	0.699807	0.858954	0.573341	0.712023	0.880541	0.8073	1.00377	1.01913	0.705275	0.894959	1.04864	0.674528	1.27179	0.779613	0.898858	1.58948
	0.747195	0.806327	0.72362	1.1137	0.703137	0.837091	0.684869	0.716678	0.838151	1.22943	0.837126	1.45391	0.637627	0.670385	0.859508	1.19221	0.756184	0.773076	0.949585	0.744044	1.24415	0.841079	0.718768	0.877919	0.529378	0.604496	0.735602	0.702352	0.666311	0.844652	0.687189	0.989121	0.611388	0.755266	0.991179	0.751847	0.935341	1.25638	0.659023	0.94067	1.03507	0.732081	1.22071	0.608361	0.865353	0.802499
	0.792155	0.822592	0.737009	0.976943	0.770202	0.808953	0.989222	0.497687	0.805463	1.2317	0.72684	1.40914	0.696697	0.711948	0.850044	0.932459	0.719329	0.80785	1.01092	0.616033	1.13341	0.902592	0.778688	0.868518	0.603474	0.649475	0.738952	0.743614	0.647962	0.701436	0.669079	0.917725	0.563549	0.811656	0.808269	0.713746	0.906098	1.1378	0.817703	0.996464	0.960578	0.575104	0.981862	0.660359	0.782253	0.896804
	0.881019	0.761456	0.791834	1.1223	0.54508	0.775169	0.685905	0.857026	0.804495	1.20366	0.679725	1.15041	0.602883	0.75229	0.856171	0.765071	0.684134	0.785794	0.876312	0.704461	1.04037	1.80186	0.825724	0.832669	0.701163	0.652421	0.72255	1.00123	0.652946	1.10524	1.02635	0.876929	0.567474	0.910706	0.783392	0.716803	0.939053	1.05626	0.877517	1.00782	0.827071	0.63532	0.875333	0.759392	0.810691	0.886778
	0.905759	0.737436	0.798256	1.13592	0.604506	0.753285	0.686427	0.93185	0.832782	1.22676	0.698686	0.917689	0.569876	0.784745	0.849068	0.687511	0.713355	0.762736	0.737625	0.726272	0.986189	1.7001	0.845888	0.788904	0.809568	0.546418	0.728608	0.735916	0.763064	0.97078	0.997198	0.869271	0.617224	0.682527	0.791206	0.762749	0.854003	1.00209	0.665314	0.751145	1.01446	0.700339	0.919513	0.640757	0.833469	0.719486
	0.849497	0.694024	0.76898	1.10902	0.617458	0.755581	0.694251	0.91566	0.869376	1.22096	0.758908	0.805871	0.596134	0.844317	0.830771	1.38479	0.514423	0.75627	0.722659	0.66697	0.93887	1.35047	0.861577	0.787131	0.917915	0.512225	0.768811	0.59987	0.888443	0.776664	0.971355	0.875472	0.67681	0.600466	0.80607	0.854389	0.842533	0.936295	0.721119	0.768197	1.08043	0.755283	1.16616	0.633712	0.776896	0.610555
	0.790634	0.663068	0.774387	1.0413	0.606965	0.791152	0.681176	0.85889	0.903566	0.955946	0.738068	0.864378	0.680105	0.973973	0.757036	1.43251	0.611907	0.850806	0.752717	0.680447	0.89379	0.999476	0.9162	0.848782	0.853869	0.547925	0.827627	0.543093	0.917855	0.608687	0.944239	0.851482	0.675608	0.714072	0.811345	0.781089	0.803813	0.898917	0.788559	0.818138	1.02615	0.611176	1.18068	0.723221	0.814382	0.649248
	0.762862	0.670732	0.815193	0.92913	0.591326	0.865516	0.639474	0.747238	0.930938	0.883695	1.10602	0.816863	0.749485	0.996754	0.704539	1.42697	0.728247	0.812288	0.915024	0.695439	0.89391	0.751522	0.886136	0.876121	0.684789	0.60028	0.798283	0.539915	0.679259	1.03744	0.901935	0.855767	0.56967	0.77019	0.823819	0.734143	0.784306	0.873311	1.01901	0.874598	0.909369	0.605431	1.17691	0.634661	0.781207	0.941487
	0.768263	0.714078	0.886146	1.10397	0.596849	1.47483	0.584103	0.562014	0.987452	0.840276	1.08052	0.943541	0.757673	0.723545	0.718491	1.40618	0.764492	0.80029	0.892234	0.88092	0.910959	0.65215	0.732542	0.871088	0.606478	0.657129	0.679973	0.568516	0.593758	0.872897	0.819323	0.883881	0.607433	0.842997	0.888586	0.734908	0.801835	0.868796	1.11204	0.950187	0.779262	0.668402	1.11434	0.755614	0.752014	1.29596
	0.799604	0.769254	0.845856	1.06738	0.630039	1.13983	0.558029	0.794543	0.928509	1.1179	0.956155	1.04869	0.731833	0.618587	0.775029	1.36404	0.709765	0.784671	1.08634	0.911422	0.903959	0.653554	0.736439	0.84642	0.558961	0.577142	0.675633	0.597293	0.64434	0.688541	0.72608	0.82315	0.671369	0.955942	0.952815	0.771714	0.884434	0.867526	1.00009	1.01695	0.72141	0.753914	0.936027	0.780207	0.776495	1.50955
	0.846596	0.819199	0.84893	1.01757	0.690218	0.914023	0.633754	0.874356	0.86928	0.984008	0.879468	1.11183	0.726963	0.599685	0.83051	1.23636	0.652279	0.75638	0.944346	0.864826	0.870348	0.79955	0.762445	0.848452	0.519955	0.504687	0.701092	0.601075	0.66988	0.550294	0.678903	0.813417	0.742755	0.700931	0.799033	0.828727	0.758657	0.912729	0.964936	0.718291	1.03667	0.664993	0.876173	0.845232	0.854186	0.763656
	0.945187	0.887563	0.88221	0.909722	0.767139	0.818009	0.893829	0.876401	0.834456	0.899087	0.86045	1.10172	0.738841	0.616949	0.853048	1.02811	0.679162	0.717906	0.810288	0.80532	1.34005	0.954597	0.796732	0.823805	0.500095	0.507448	0.713114	0.58117	0.636564	0.898815	0.663512	0.829436	0.976303	0.5973	0.779506	0.933069	0.768844	0.988608	0.998768	0.719843	1.08183	0.667172	0.980377	0.920219	0.675107	0.829615
	0.981931	0.827251	0.936438	1.07618	0.465647	0.783945	0.71592	0.836284	0.836254	0.846941	0.891636	1.07001	0.732363	0.625495	0.817666	0.832033	0.819186	0.831937	0.783608	0.880171	1.25651	1.61616	0.843532	0.837128	0.519984	0.558857	0.701878	0.616991	0.567865	0.742151	0.656961	0.861351	0.627686	0.704648	0.810642	0.757229	0.77802	1.39917	1.09397	0.774733	1.0838	0.743372	1.16472	0.779585	0.729941	0.825789
	0.911969	0.798996	0.993818	0.982153	0.546335	0.767484	0.71734	0.745281	0.867235	0.803024	0.930364	1.10249	0.691419	0.632095	0.673174	0.717817	0.53097	0.783068	0.894724	0.804096	1.1287	1.74222	0.91794	0.892143	0.577535	0.634023	0.698497	0.662147	0.629554	0.60521	0.639081	0.913032	0.595444	0.77113	0.832359	0.817854	0.75304	1.27201	1.08509	0.842479	1.00766	0.676508	1.12031	0.777679	0.738767	0.693433
	0.828439	0.74744	0.959924	0.933947	0.593135	0.730197	0.694515	0.591381	0.911531	1.25137	0.931267	1.22118	0.638682	0.657494	0.604292	1.33648	0.59002	0.769107	0.90817	0.754001	1.01774	1.56259	1.03576	0.839188	0.66123	0.721419	0.727208	0.705864	0.734537	0.529606	1.14972	0.861803	0.644743	0.865343	0.844076	0.881607	0.723299	1.16148	0.948222	0.920702	0.867838	0.699606	1.04536	0.750739	0.715684	0.629545
	0.792448	0.699551	0.987271	0.856355	0.604012	0.689634	0.645041	0.739312	0.948128	1.121	0.884178	1.28988	0.986635	0.716067	0.625358	1.39088	0.676216	0.759309	1.02949	0.828959	0.95912	1.13699	1.10688	0.831701	0.758163	0.542878	0.784002	0.704638	0.874261	0.937804	1.07522	0.780354	0.715937	0.763259	0.882201	0.937477	0.732183	1.09427	0.904393	0.995216	0.74683	0.7603	0.970394	0.750249	0.710616	0.666292
	0.80472	0.679828	1.02869	1.05435	0.59173	0.673347	0.580557	0.828767	1.02814	0.980119	0.817347	1.16981	0.707997	0.816285	0.713824	1.32895	0.705354	0.733823	0.948243	1.00176	0.957878	0.755948	0.780859	0.841694	0.875876	0.485477	1.0944	0.986258	0.898015	0.764514	0.975381	0.752533	0.800143	0.714339	0.923514	0.90266	0.805354	1.00915	0.920733	0.702196	0.720572	0.709966	0.842378	0.802575	0.757401	0.917997
	0.843697	0.695907	1.07044	0.900819	0.568799	0.694076	0.546378	0.838504	0.926629	0.883318	0.763073	0.959498	0.597273	0.96978	0.811047	1.24182	0.664706	0.689792	0.945676	0.912477	0.962913	0.588787	0.760731	0.839624	0.807737	0.504677	0.792715	0.727623	0.705748	0.62331	0.901108	0.771114	0.870443	0.732563	0.78022	1.03239	0.704697	0.923406	1.00408	0.751842	1.04562	0.673535	0.824134	0.901211	0.864114	1.21072
	0.909135	0.740857	1.0785	0.852923	0.586021	0.748067	0.602576	0.8079	0.855546	0.822126	0.739921	0.790521	0.567013	1.14729	0.858885	1.16942	0.632699	0.743552	0.815505	0.758318	0.98004	0.6226	0.783585	0.845891	0.664744	0.573924	0.685904	0.595701	0.627947	0.539018	0.849187	0.818286	0.653854	0.781371	0.774594	1.0613	0.703486	0.858977	1.08828	0.822477	1.05503	0.695459	0.961639	1.00173	0.708832	1.39492
	0.897781	0.81076	1.13488	0.767302	0.624748	0.847514	0.834051	0.73282	0.835204	0.764555	0.736917	0.719884	0.59323	0.841635	0.812905	1.10545	0.687174	0.733171	0.791178	0.720649	0.952807	0.78718	0.831221	0.88394	0.598582	0.669752	0.670142	0.550415	0.634401	0.507319	0.785886	0.841028	0.637484	0.88421	0.825279	1.13003	0.74702	0.909688	1.1344	0.898982	1.04262	0.794051	0.975559	0.805166	0.689315	0.751525
	0.832414	0.925518	1.16311	1.04041	0.689133	1.2195	0.717644	0.600524	0.85849	1.21907	0.718298	0.793782	0.658813	0.647732	0.650969	0.994477	0.839924	0.713116	0.845089	0.780115	0.886519	0.984121	0.924677	0.912188	0.557529	0.696108	0.693747	0.566391	0.642429	0.86575	0.705468	0.965069	0.67934	0.818943	0.869894	1.18393	0.762883	0.903844	0.884989	0.984597	0.964728	0.781532	1.05205	0.79009	0.682269	0.793352
	0.842074	0.898274	1.19356	0.906479	0.762001	0.892112	0.713344	0.688888	0.913699	1.25233	1.04308	0.838706	0.717583	0.605325	0.563701	0.83743	1.02103	0.726718	0.773581	0.898431	0.856643	1.70696	1.07171	0.755985	0.520614	0.535095	0.710839	0.61397	0.611624	0.672134	0.650168	0.872608	0.745702	0.801697	0.895699	0.857048	0.730655	0.926847	0.806371	0.67905	0.839306	0.71185	0.941764	0.763122	0.673206	0.794824
	0.913708	0.877704	1.19583	0.808915	0.496905	0.760634	0.687447	0.793104	0.955334	1.11068	1.05914	0.997759	0.728528	0.640595	0.577524	0.711953	0.763043	0.675525	0.747717	0.895316	1.3464	1.72461	1.221	0.77597	0.500064	0.496803	0.70353	0.645382	0.583731	0.544975	0.636432	0.788636	0.826422	0.806391	0.940584	0.844667	0.699452	0.959408	0.846511	0.708394	0.737186	0.740272	0.864453	0.725651	0.689877	0.737852
	0.76722	0.819363	1.12117	0.834488	0.553055	0.733087	0.639584	0.806673	1.10597	0.963236	0.979077	1.11689	0.719504	0.674748	0.683729	0.650336	0.600434	0.695005	0.734941	0.753239	1.223	1.40728	0.839098	0.78224	0.511817	0.531731	0.689218	0.63128	0.606715	0.493835	0.644191	0.711729	0.849686	1.1602	0.969421	0.839351	0.711901	1.42838	0.943068	0.779378	0.985518	0.763382	0.836538	0.711788	0.751918	0.612965
	0.747908	0.755199	1.31499	0.812634	0.591369	0.749908	0.584735	0.783638	0.980615	0.852798	0.915212	1.16577	0.719814	0.665454	0.806893	1.39441	0.584977	0.704413	0.825375	0.714702	1.10417	0.942146	0.774775	0.80724	0.55399	0.605038	0.701471	0.604239	0.699013	0.531814	0.651963	0.696581	0.704629	1.04837	0.756485	0.80352	0.768511	1.40937	1.03089	0.853844	0.959472	0.73536	0.853232	0.757536	0.860442	0.671249
	0.804722	0.705546	1.33238	1.17211	0.600739	0.752126	0.554753	0.729948	0.880901	0.777785	0.861981	1.1441	0.722557	0.63201	0.873644	1.33689	0.615999	0.736488	0.735726	0.73974	0.999189	0.679738	0.78388	0.84437	0.62203	0.706095	0.739061	0.601714	0.875877	0.802676	1.23375	0.744673	0.690347	0.941658	0.767092	0.795075	0.869294	1.30494	1.10897	0.935736	0.893898	0.673856	0.916844	0.8742	0.705057	0.879334
	0.759112	0.689716	1.32814	1.11339	0.579331	0.711983	0.604569	0.632341	0.840254	1.24491	0.835928	1.1143	0.703769	0.637753	0.822751	1.18456	0.620072	0.739801	0.68709	0.731172	0.959949	0.668412	0.850394	0.883416	0.708496	0.58056	1.11401	0.625729	0.723507	0.623809	1.28626	0.764307	0.711881	0.948058	0.816529	0.779713	0.754108	1.21637	0.70023	0.638169	0.805164	0.651143	0.983084	1.02932	0.658564	1.1284
	0.719675	0.720065	1.2653	1.05958	0.588216	0.662614	0.817453	0.757818	0.858075	1.25039	0.839165	1.11995	0.663036	0.719511	0.657069	1.03056	0.612276	0.689805	0.681751	0.910234	0.999492	0.823669	0.936642	0.885035	0.838083	0.564649	0.83591	0.659112	0.630235	0.500344	1.15085	0.914451	0.715564	1.03102	0.897526	0.816999	0.666023	1.12237	0.77188	0.706591	0.740779	0.701045	1.01523	0.92811	0.640239	1.31422
	0.69673	0.7978	1.43036	1.08552	0.605915	0.644114	0.676198	0.780953	0.918918	1.09846	0.853525	1.12458	0.628368	0.881397	0.558943	0.912482	0.642025	0.741715	0.745847	0.790814	1.05232	1.04225	1.07899	0.792794	1.082	0.595994	0.71058	0.666608	0.636703	0.468015	0.953241	0.987709	0.855827	1.00298	0.942529	0.762275	0.686735	1.02416	0.886435	0.783378	0.880994	0.73558	0.904888	0.803775	0.638177	0.76716
	0.681213	0.95562	1.24403	1.13004	0.659183	0.67053	0.660096	0.770214	1.0306	0.943633	0.848435	1.05698	1.03175	1.12339	0.567563	0.836092	0.747092	0.778572	0.815516	0.737249	1.08129	1.74907	0.825447	0.743111	0.798534	0.667043	0.682723	0.972688	0.660462	0.514277	0.816418	0.910655	0.750708	0.92811	0.98145	0.80273	0.75173	0.983974	1.00005	0.868808	0.855015	0.75261	0.850174	0.755613	0.667439	0.789593
	0.678264	0.975785	1.04181	1.08088	0.735461	0.734337	0.630432	0.743837	0.915167	0.816842	0.818576	0.929453	0.725144	1.06053	0.680677	0.76269	0.911053	0.756441	0.720244	0.71432	1.02873	1.62694	0.835176	0.748506	0.658328	0.687246	0.705617	0.743173	0.646941	0.854189	0.740843	0.8523	0.743673	0.826184	0.724589	0.824621	0.775385	1.00565	1.06371	0.550472	0.809092	0.690294	0.830813	0.726188	0.738183	0.784803
	0.782608	0.917536	1.46081	1.02881	0.799335	0.839288	0.592964	0.699074	0.86029	0.720874	0.763456	0.791849	0.591283	0.730939	0.82282	0.676592	1.07298	0.909093	0.666606	0.769535	0.938186	1.29762	0.925364	0.784308	0.595319	0.69273	0.734275	0.628005	0.612294	0.747027	0.685346	0.758265	0.750018	0.853728	0.761899	0.818052	0.732948	1.00066	1.17331	0.616597	0.761264	0.74623	0.846799	0.688677	0.834302	0.731954
	0.781961	0.829589	1.35066	1.02527	0.505624	1.5533	0.576609	0.60733	0.865322	1.23849	0.708485	0.69387	0.557979	0.612562	0.924686	0.616738	0.740661	0.849738	0.66259	1.00283	1.30689	0.99124	0.85001	0.82274	0.554991	0.729685	0.735353	0.615743	0.597412	0.596018	0.635156	0.677222	0.735139	0.913527	0.836611	0.807228	0.699228	0.979192	0.682704	0.70383	0.74589	0.739208	0.895188	0.675214	0.801161	0.649369
	0.764046	0.748906	1.15505	1.03911	0.552729	0.990809	0.640165	0.735141	0.922084	1.09269	0.66579	0.661906	0.579101	0.635932	0.835301	0.598442	0.641389	0.790768	0.72368	0.899762	1.17526	0.860955	0.770097	0.847822	0.526571	0.84773	0.719019	0.663645	0.736327	0.49466	0.606252	0.677305	0.775245	0.928213	0.909084	0.842486	0.715593	0.953	0.826048	0.804363	0.778464	0.676555	0.997943	0.724669	0.681478	0.667549
	0.731955	0.708027	0.988112	1.17665	0.591379	0.731873	0.854681	0.757665	0.937518	0.929932	0.677361	0.860648	0.636304	0.720001	0.66963	1.22505	0.601101	0.767679	0.835898	0.787529	1.06715	0.91614	0.737212	0.831896	0.505137	0.880839	0.712167	0.720858	0.624455	0.474318	0.609537	0.749486	0.784868	0.890345	0.963162	0.735675	0.767345	1.43227	0.970356	0.824115	0.751774	0.640158	0.936079	0.834421	0.636494	0.837722
	0.702824	0.723519	0.911759	1.05989	0.610921	0.664421	0.612686	0.758485	0.895632	0.77978	0.742139	1.00958	0.688566	0.77222	0.570162	1.3508	0.580826	0.890023	0.817222	0.769731	0.990602	1.65395	0.780102	0.775054	0.507948	0.924715	0.732552	0.73132	0.656645	0.516763	0.632508	0.849088	0.786347	0.81719	0.991749	0.742695	0.839172	1.42641	1.06519	0.872955	0.732736	0.671489	0.918084	0.984652	0.617727	1.0712
	0.678678	0.804556	1.36373	1.01737	0.613299	0.698216	0.629454	0.726798	0.884183	0.650391	1.02962	1.11749	0.703913	0.732495	0.571521	1.2463	0.614666	0.836461	0.731786	0.713415	0.980692	1.57694	0.775133	0.757275	0.536858	0.752264	1.20755	0.689702	0.721659	0.702168	0.647109	0.88196	0.646507	0.72515	0.773305	0.801751	0.71922	1.29303	1.10869	0.856825	0.723781	0.721348	0.914236	0.922599	0.612222	1.26763
	0.672221	1.00676	1.24484	0.993067	0.626864	0.75892	0.623435	0.765331	0.756911	1.21593	1.05385	1.15711	0.690499	0.65814	0.692124	1.02947	0.711713	0.779261	0.676416	0.7543	1.049	0.752693	0.649057	0.779186	0.591346	0.658724	0.914852	0.637554	0.73226	0.604184	1.29597	0.85799	0.691576	0.873247	0.850533	0.829377	0.649195	1.21956	0.576649	0.812324	0.749424	0.771761	0.920318	0.777905	0.642151	0.809118
	0.6856	1.09127	1.07686	0.975103	0.671679	0.78761	0.610171	0.722767	0.682541	1.03707	0.995636	1.14845	0.673843	0.64729	0.854812	0.823247	0.856342	0.746397	0.658294	0.892388	1.14098	0.670177	1.05459	0.802474	0.673005	0.713278	0.752729	0.613928	0.675256	0.537755	1.39113	0.862592	0.593493	0.874583	0.911712	0.815752	0.681169	1.17055	0.761815	0.77635	0.717905	0.560597	0.927937	0.71178	0.713093	0.802742
	0.722346	1.03777	0.955827	0.957264	0.749898	0.74949	0.611939	0.70679	0.73088	0.918485	0.961316	1.13601	0.619012	0.754828	0.981062	0.692312	1.00676	0.753989	0.694085	0.923193	1.17875	0.768254	0.934999	0.806512	0.79349	0.784369	0.704482	0.612565	0.641084	0.530827	1.18665	0.826896	0.601362	0.845283	0.95027	0.793618	0.695052	1.11682	0.921861	0.867349	0.69454	0.665238	0.997588	0.677421	0.802551	0.742838
	0.787895	0.922621	0.920931	1.03259	0.842487	0.689761	0.691706	0.730017	0.740924	1.02798	0.902606	1.10472	0.649658	0.996319	0.686709	0.633241	0.942503	0.791051	0.804184	0.877655	1.23383	0.700803	0.848336	0.798217	0.812879	0.824309	0.722979	0.617687	0.703181	0.568372	0.91635	0.74747	0.642297	0.778348	0.816228	0.820704	0.788062	0.975887	0.997099	0.886162	0.699453	0.725908	1.00214	0.644031	0.753066	0.656887
	0.750275	0.811399	0.971303	0.998957	0.898853	0.658471	0.929327	0.742704	0.692824	0.981515	0.830042	1.02668	0.636372	1.3244	0.591118	0.614273	0.771172	0.843776	0.971956	0.847473	1.11228	0.662522	0.784864	0.767899	0.665972	0.841774	0.761191	0.614699	0.807433	0.675713	0.733695	0.686032	0.663749	0.703486	0.878458	0.799163	0.754667	1.08878	1.00184	0.858784	0.719205	0.72313	1.03787	0.640121	0.662352	0.658248
	0.747499	0.751123	1.20838	1.00633	0.529098	0.675779	0.6252	0.773082	0.632457	0.867223	0.781935	0.910997	0.645376	0.978448	0.59477	0.594044	0.670569	0.82444	0.837535	0.78017	1.01621	0.680791	0.751298	0.742235	0.602803	0.879797	0.784377	1.0119	0.84307	0.654938	0.651133	0.714049	1.07084	0.872803	0.886831	0.713718	0.726666	1.07669	0.692177	0.799632	0.753784	0.671161	1.05591	0.677586	0.633722	0.815504
	0.737778	0.756208	1.13148	0.968982	0.565205	0.74145	0.633933	0.804681	0.605971	1.10945	0.776637	0.789987	1.05738	0.690086	0.71404	0.573732	0.635742	0.785433	0.76718	0.719073	0.975584	0.779424	0.760113	0.783556	0.55538	0.662682	0.777131	0.77098	0.760655	0.643223	0.623154	0.807635	0.728749	0.830025	0.86774	0.732806	0.740615	1.41259	0.841635	0.758283	0.709356	0.64564	1.05012	0.774823	0.616777	1.04023
	0.737696	0.850509	1.01555	0.931781	0.625152	1.41917	0.63142	0.790864	0.611961	1.17875	0.780426	0.696561	0.764134	0.61638	0.877369	0.575368	0.69416	0.733441	0.69612	0.768974	0.99559	0.733279	0.754991	0.844147	0.548708	0.594302	0.771603	0.691829	0.769438	0.648521	0.608683	0.847313	0.604127	0.801182	0.786888	0.777837	0.772559	1.31778	0.885676	0.746925	0.730563	0.669156	1.00375	1.13419	0.606584	1.24431
	0.732343	1.09486	0.940827	0.911993	0.648661	0.871114	0.644693	0.676986	0.692331	1.15209	0.76311	0.650266	0.605747	0.676606	0.99364	1.14274	0.832693	0.713875	0.655457	0.876962	1.07956	0.696399	0.712234	0.844657	0.527256	0.620293	0.777466	0.716407	0.874325	0.668204	0.603356	0.899669	0.607082	0.74735	0.728054	0.796407	0.809456	1.28739	0.896566	0.903705	0.765923	0.711104	1.06822	0.889331	0.62571	0.85482
	0.714658	1.15092	0.941645	1.00674	0.691983	0.661279	0.749149	0.66168	0.682307	1.09844	0.725705	0.752226	0.557501	0.794358	0.706758	1.23323	0.980693	0.727201	0.671841	0.88736	1.19909	0.66827	0.619992	0.805567	0.518372	0.680912	1.03466	0.786489	0.903826	0.770285	0.608605	0.989552	0.633894	0.664298	0.757602	0.737139	0.893084	1.31808	0.734118	0.875665	0.784529	0.770577	1.16884	0.754769	0.685187	0.847107
	0.69312	1.0285	1.01831	1.0025	0.773344	0.634527	0.671838	0.695731	0.681841	0.960643	0.67092	0.872454	0.569697	0.80588	0.635388	1.1105	1.08607	0.754087	0.774393	0.858273	1.05434	0.667675	0.516951	0.752866	0.534108	0.73718	0.80911	0.834848	0.662333	0.805885	0.623089	0.90282	0.64667	0.556248	0.820106	0.771219	0.699955	1.29239	0.764981	0.844371	0.824421	0.553282	1.20481	0.687515	0.776036	0.783329
	0.680115	0.888099	0.946506	0.965219	0.887417	0.704685	0.659171	0.717799	0.647371	1.01148	0.626658	0.975358	0.624139	0.784148	0.642293	0.879765	0.963507	0.782021	0.96107	0.831592	0.970782	0.779219	1.20049	0.809244	0.578958	0.790136	0.724392	0.821198	0.683219	0.806525	1.39013	0.860215	0.954964	0.803131	0.865887	0.791125	0.642038	1.19279	0.803874	0.781351	0.860549	0.661392	1.17744	0.648489	0.652651	0.694279
	0.687095	0.812116	1.02369	0.952895	1.00218	0.805968	0.671919	0.761456	0.635459	1.19949	0.611713	1.0596	0.679344	0.6898	0.737476	0.686281	0.824611	0.76925	0.867861	0.773275	0.938495	0.754894	1.00863	0.886789	0.649984	0.949613	0.729989	0.764605	0.68514	0.790701	1.15959	0.785707	0.70681	0.759972	0.754769	0.759278	0.663912	1.17738	0.656717	0.743082	0.897073	0.714429	1.06231	0.620761	0.645077	0.676358
	0.719725	0.820145	0.969327	0.915071	1.03962	0.85746	0.711698	0.780012	0.662005	1.27055	0.74954	1.11773	0.690453	0.683676	0.872294	0.58252	0.783069	0.772496	0.800113	0.725353	0.694568	0.749013	0.895116	0.890129	0.753941	0.748678	0.77448	0.701795	0.684847	0.940285	0.854583	0.741214	0.619969	0.704816	0.761424	0.725768	0.73644	1.30322	0.74992	0.738665	0.942555	0.696073	1.11086	0.626443	0.644583	0.815921
	0.773587	0.933494	0.93709	0.90098	0.56081	0.831838	0.767195	0.809144	0.653378	1.2864	1.03788	1.15397	0.65808	0.826899	0.695976	0.567221	0.846675	0.763702	0.716152	0.780907	0.677525	0.732785	0.689472	0.821458	0.839117	0.606482	0.818689	0.6601	0.713864	0.98944	0.665551	0.730635	0.617285	0.623747	0.822548	0.727477	0.780766	1.42459	0.94926	0.729768	0.707741	0.653558	1.25357	0.664696	0.636415	1.02612
	0.840507	1.10807	0.957278	0.950764	0.622169	0.758657	0.881891	0.717101	0.680798	1.25261	1.03506	1.1449	0.622928	1.17698	0.706302	0.597127	0.995652	0.733013	0.657202	0.85997	0.642208	0.698324	0.760515	0.720139	0.683281	0.558968	0.843044	0.623878	0.745906	0.973143	0.594152	0.805375	0.629491	0.517323	0.89779	0.725853	0.770877	0.923691	0.994812	0.922001	0.830459	0.649731	1.30617	0.740216	0.641919	1.22828
	0.732815	0.981242	1.03865	0.966679	0.678778	0.707961	0.704858	0.590578	0.656768	1.1449	0.968016	1.07442	0.60639	0.956152	0.762911	0.61172	1.09919	0.703923	0.666472	0.849095	0.627988	0.66826	0.762995	0.923905	0.627832	0.575618	0.856116	0.588542	0.66394	1.13683	0.60256	0.923034	0.639992	0.764556	0.909632	0.725641	0.751797	0.87214	1.01987	0.858062	0.872653	0.674492	1.22865	1.32281	0.684842	0.921034
	0.713844	0.895252	1.15874	0.968388	0.765685	0.709244	0.706502	0.661355	0.666223	1.00039	0.946324	0.951419	0.611018	0.696604	0.764649	0.602046	0.983137	0.690174	0.750928	0.79196	0.664495	0.834035	0.787958	0.916374	0.607638	0.629567	0.868587	1.03162	0.684897	0.747907	0.630369	1.00265	0.655354	0.690124	0.774948	0.705273	0.756171	0.825366	1.00113	0.813663	0.642157	0.697181	1.26175	1.04218	0.770456	0.894507
	0.721133	0.902626	0.928701	0.952401	0.891348	0.768638	0.748867	0.694845	0.65415	1.26567	0.90709	0.813093	0.63362	0.637517	0.77129	0.593279	1.03748	0.698526	0.904745	0.788341	0.787088	0.745598	0.764155	0.835209	0.593407	0.695795	0.876144	0.813082	0.707692	0.838825	0.644664	1.20733	1.1257	0.59733	0.769379	0.742192	0.759715	0.809214	0.807832	0.767792	0.703971	0.573179	0.7108	0.85474	0.669607	0.832927
	0.742069	0.621954	0.938183	0.93499	1.03791	1.74769	0.822101	0.708676	0.661751	1.3421	0.83756	0.713063	0.694101	0.70499	0.515262	0.984804	1.15407	0.735532	1.09345	0.761121	0.691645	0.734746	0.695484	0.93601	0.562967	0.766901	0.742444	0.75431	0.725144	0.686826	0.64479	1.01638	0.901772	0.477855	0.844823	0.763394	0.771396	0.986839	0.828999	0.733806	0.761342	0.67183	0.780624	0.740112	0.693767	0.747741
	0.761296	0.58111	0.935606	0.940786	1.16083	1.37428	0.958594	0.790521	0.693069	1.36936	0.77318	0.675791	0.845711	0.82106	0.586154	1.07701	0.777891	0.781563	0.881062	0.731817	0.693239	0.761231	0.619955	0.920692	0.539139	0.833719	0.722575	0.78987	0.704365	0.645192	0.628307	0.886108	0.704363	0.735193	0.941801	0.825477	0.935884	1.00067	0.88057	0.731348	0.798566	0.700813	0.89016	0.683379	0.695801	0.725688
	0.759894	0.567934	0.955326	0.96454	1.16453	0.891193	0.815751	0.790441	0.736836	1.35353	0.743779	0.816675	0.658809	0.867722	0.543638	0.988443	0.61415	0.722024	0.805276	0.767229	0.673437	0.764789	0.572053	1.1682	0.543933	0.950808	0.759555	0.85815	0.595837	0.659197	1.05137	0.785816	0.634027	0.613426	1.01449	0.757207	0.725409	0.949152	0.927263	0.692118	0.768139	0.658851	0.854611	0.655204	0.691832	0.835764
	0.731322	0.59983	1.01999	0.937377	0.575996	0.689516	0.746358	0.718123	0.703638	1.26543	0.732248	0.8778	0.576716	0.80516	0.509622	0.788884	0.579949	0.735103	0.725823	0.792696	0.6515	0.733661	0.571143	1.04864	0.585347	0.778041	0.820709	0.890097	0.63619	1.03456	0.764267	0.740557	0.620186	0.477482	0.773498	0.736057	0.643255	0.875425	0.949692	0.716997	0.691249	0.63385	0.80636	0.645514	0.71465	1.01956
	0.696031	0.598656	1.11587	0.95697	0.672578	0.658937	0.715805	0.632517	0.682047	1.1421	0.723341	0.918753	0.567664	0.733542	0.56096	0.628375	0.62258	0.758724	0.672771	0.720789	0.633715	0.673462	1.35141	0.969448	0.648665	0.64375	0.874027	0.869618	0.67359	0.723228	0.602055	0.791551	0.623557	0.630435	0.721565	0.703093	0.636313	0.831354	0.954168	0.916619	0.67761	0.647102	0.727112	0.661239	0.786462	1.21513
	0.681871	0.59171	1.16295	0.975534	0.817446	0.744516	0.719141	0.691724	0.64114	1.31874	0.709611	0.974525	0.612687	0.751112	0.644404	0.577846	1.08165	0.74612	0.669224	0.735098	0.644473	1.40687	1.1353	0.900565	0.734852	0.567025	0.919992	0.824253	0.691713	0.58188	0.56888	0.929805	0.609955	0.659044	0.823465	0.658025	0.680149	0.809396	0.780913	0.825802	0.711779	0.68905	0.682023	0.706763	0.930401	0.947439
	0.692725	0.570388	0.894785	0.988055	0.988742	0.867259	0.753155	0.736386	0.655859	1.39531	0.681144	1.06989	0.670641	0.936949	0.680808	0.621926	0.735462	0.677295	0.722872	0.73716	0.712983	1.09881	0.965969	1.06386	0.889699	0.53849	0.951119	0.776485	0.691334	0.571862	0.617277	1.08394	0.692827	0.682174	0.981924	0.647871	0.726561	0.755826	0.774191	0.783879	0.735094	0.506526	0.729277	1.16693	0.775381	0.863893
	0.729291	0.570934	0.948211	0.989023	1.15592	0.943131	0.842474	0.763236	0.658811	1.42874	0.646038	1.14052	0.689852	1.31243	0.537873	0.695464	0.601138	0.667815	0.793389	0.728785	0.850314	0.843599	0.876378	0.984114	0.70569	0.558776	0.94484	0.723977	0.705458	0.603629	0.689217	1.40573	1.14624	0.714032	1.11615	0.668971	0.737665	1.01345	0.8195	0.749804	0.743238	0.609919	0.822458	0.954754	0.763677	0.809577
	0.791199	0.60891	0.948056	0.990993	1.26555	0.926338	1.06096	0.741233	0.681544	1.38146	0.611233	1.12867	0.656677	0.995581	0.493531	0.718339	0.554316	0.653265	0.962734	0.731984	0.657045	0.724167	0.823193	0.911601	0.666646	0.61535	0.758245	0.654984	0.762776	1.29472	0.737663	1.15051	0.878078	0.679274	1.16849	0.719795	0.736727	1.01017	0.858379	0.724074	0.731327	0.672975	0.921289	0.81813	0.752906	0.790762
	0.901545	0.666143	0.940599	0.98834	1.23155	0.852135	0.871268	0.684419	0.72558	1.21629	1.00954	1.03524	0.620311	0.746917	0.531224	0.689174	0.579948	0.682493	0.882613	0.714025	0.685337	0.704731	0.788002	0.83739	0.651939	0.690733	0.703175	0.56273	0.579619	0.955162	0.732831	0.941579	0.697135	0.683807	1.06311	0.740015	0.736466	0.979822	0.895557	0.723393	0.688833	0.672082	0.887083	0.730589	0.759572	0.872526
	0.697924	0.535345	0.963042	0.974053	0.812249	0.782589	0.86706	0.621004	0.785379	1.36179	1.01548	0.885764	0.6049	0.673943	0.603335	0.975389	0.642569	0.765769	0.790071	0.635959	0.684416	0.732999	0.788488	0.833151	0.636323	0.775825	0.72293	1.05442	0.628768	0.646474	0.525697	0.787212	0.630587	0.709434	0.659502	0.801944	0.728343	0.947933	0.932872	0.742845	0.654544	0.613979	0.875733	0.695539	0.804972	1.02948
	0.705696	0.580423	1.01564	0.969918	0.988281	0.7513	0.821038	0.714528	0.716759	1.43334	0.919565	0.743067	0.617153	0.715974	0.724267	0.932904	0.650862	0.698001	0.732117	0.677232	0.678196	0.750342	0.807956	1.05289	0.596984	0.794076	0.781967	0.85054	0.67933	0.518074	0.55205	0.742523	0.617386	0.741244	0.692464	0.77213	0.725266	0.906253	0.935554	0.753201	0.735226	0.611726	0.821626	0.694435	0.818368	1.22867
	0.726722	0.59553	1.06931	0.997957	1.16028	1.92121	0.761845	0.7473	0.741748	1.46538	0.871656	0.89919	0.665319	0.800638	0.613147	0.779293	0.963262	0.704803	0.692541	0.700533	0.674705	0.739433	0.780204	0.981949	0.560932	0.655195	0.850299	0.790275	0.682009	0.522192	0.646455	0.835885	0.626059	0.776907	0.896817	0.736886	0.997868	0.860901	0.896683	0.819359	0.721131	0.673184	0.720175	0.705511	0.81221	0.861054
	0.769387	0.600188	1.06704	1.03417	1.29742	1.45804	0.715738	0.70416	0.69767	1.39084	0.849554	0.920404	0.760623	0.842617	0.509844	0.657352	0.842013	0.737853	0.674243	0.695877	0.651392	0.63524	0.717587	0.98714	0.561927	0.56729	0.914235	0.813153	0.664853	0.554471	0.760419	1.02289	0.663516	0.787097	1.14799	0.636241	0.780649	0.823106	0.781082	0.767472	0.72928	0.730865	0.642586	0.734002	0.789671	0.867039
	0.812584	0.616272	0.950095	1.05879	1.22959	1.02136	0.701284	0.692836	0.638485	1.28177	0.828608	0.893391	0.964451	0.817785	0.472365	0.645945	0.720691	0.747628	0.693961	0.675068	0.644118	1.624	0.646783	0.95964	0.601475	0.528359	0.953446	0.857309	0.708756	1.39142	0.84861	1.52378	0.736154	0.795483	1.31332	0.591774	0.660296	0.786167	0.751091	0.736418	0.726176	0.596257	0.659497	0.780928	0.788477	0.86585
	0.821666	0.65519	1.02052	1.0486	1.00609	0.791284	0.751359	0.644925	0.6346	1.39683	0.795996	0.847495	0.736089	0.797315	0.506783	0.737299	0.649043	0.710628	0.754449	0.648589	0.672387	1.61935	0.618718	0.88815	0.665912	0.531685	1.00094	0.877514	0.827962	1.16056	0.535839	1.27518	1.13951	0.702291	1.30831	0.585346	0.614175	0.740414	0.788066	0.709434	0.713929	0.653951	0.743128	1.22771	0.803828	0.926606
	0.783733	0.704436	0.984792	1.01934	1.19168	0.731664	0.942857	0.605548	0.668151	1.45268	0.766768	1.02178	0.60993	0.86534	0.565908	0.851996	0.607699	0.655608	0.86671	0.633549	0.779564	1.37021	0.656654	0.832499	0.977301	0.568331	0.77753	0.869326	1.04629	0.857463	0.667906	1.01261	0.822782	0.708094	1.07022	0.649674	0.61906	0.744258	0.821326	0.702047	0.712762	0.678127	0.815534	0.999279	0.826305	0.964771
	0.680902	0.736264	0.921936	0.968712	1.26341	0.801065	0.848936	0.741079	0.70428	1.46701	0.738659	1.09531	0.566851	1.08962	0.624864	0.892629	0.599477	0.628396	0.901335	0.604445	0.992285	1.05374	0.667265	0.894003	0.785446	0.633653	0.690917	0.848463	1.04213	0.588867	0.805339	0.809337	0.647573	0.741869	0.581872	0.709207	0.645929	0.974031	0.854335	0.725616	0.715185	0.643431	0.919	0.870413	0.809415	0.908473
	0.67369	0.55662	0.883897	1.00209	1.1726	0.925839	0.891379	0.773593	0.75896	1.41469	0.721922	1.08271	0.591578	1.07373	0.712483	0.965235	0.613454	0.648555	0.781439	0.813608	0.666391	0.82453	1.369	0.895265	0.710709	0.71675	0.689023	0.827423	0.661963	0.478458	0.866269	0.750136	0.604148	0.770399	0.676778	0.73613	0.664396	0.959569	0.894212	0.774473	0.716662	0.594295	0.859927	0.792116	0.797843	0.942037
	0.658233	0.613793	0.906943	1.0306	1.13962	1.01547	0.883177	0.75322	0.822623	1.44697	0.72282	0.943186	0.648884	0.826145	0.701817	0.986381	0.602185	0.764861	0.734541	0.846262	0.689061	0.703343	1.21804	0.922944	0.684247	0.807965	0.734397	0.780823	0.58626	0.494444	0.82231	0.831774	0.606028	0.791095	0.959914	0.747224	0.680849	0.927827	0.931752	0.872511	0.711371	0.615168	0.846848	0.732503	0.79032	0.997936
	0.681724	0.649865	0.96744	1.0819	1.1945	1.01378	0.825208	0.698066	0.801958	1.06934	0.728777	0.809858	0.686102	0.726865	0.64319	0.87337	0.624499	0.679411	0.704912	0.92693	0.682115	0.672481	1.03852	1.02903	0.658147	0.852178	0.793468	0.68782	0.652102	0.518384	0.810923	1.14103	0.634583	0.800475	1.28462	0.785551	0.684295	0.904043	0.938794	0.788294	0.759322	0.706629	0.847648	0.71049	0.78798	1.12103
	0.745005	0.679649	1.0124	1.13053	1.09863	0.952505	0.741236	0.616018	0.761534	1.1254	0.710811	1.01137	0.688435	0.737068	0.55357	0.768458	0.958418	0.673011	0.6856	0.817131	0.687389	0.681487	0.908214	1.08404	0.596174	0.683416	0.84345	0.887623	0.709879	1.19616	0.814514	1.03331	0.695006	0.781219	1.46999	0.725536	0.682641	0.888919	0.809297	0.733714	0.746927	0.649872	0.80905	0.7253	0.794748	0.929169
	0.879538	0.711129	1.08917	1.13833	1.13123	0.868441	0.674409	0.745546	0.719259	1.14951	0.658097	1.06658	0.673725	0.787001	0.478864	0.756621	0.829206	0.698134	0.687245	0.825548	0.698234	0.715944	0.849474	1.01684	0.573655	0.57043	0.878851	0.800676	0.692893	0.97544	1.08241	0.744195	0.698141	0.698447	1.34988	0.636388	0.69467	0.859242	0.749152	0.702828	0.746563	0.698187	0.722449	0.758355	0.789188	1.01562
	0.681332	0.748172	1.14873	1.08953	1.27873	1.95875	0.684269	0.790126	0.687042		1.02968	0.998993	0.660282	0.824758	0.457747	0.857003	0.753993	0.721241	0.725178	0.728146	0.677052	0.760786	0.840763	0.890454	0.574681	0.515532	0.820173	0.790358	0.638285	0.726856	0.891435	0.7197	0.578953	0.703503	1.05402	0.541565	0.858875	0.819206	0.76795	0.68525	0.722399	0.716005	0.648002	0.797674	0.751378	1.08487
	0.70624	0.771619	1.0541	1.00902	1.31995	1.59545	0.851554	0.765374	0.676352		0.920891	0.961935	0.663469	0.84188	0.487373	1.0019	0.713994	0.693222	0.828457	0.822387	0.64652	0.705558	0.828877	0.837378	0.620433	0.507396	0.714988	0.807352	0.703137	0.52838	0.777845	0.87887	0.573042	0.74161	0.527773	0.541993	0.704551	0.779488	0.78826	0.718882	0.697215	0.671559	0.646234	0.840778	1.04052	1.05226
	0.745966	0.774291	0.92043	0.910971	0.824898	1.21679	0.810628	0.702687	0.69166		0.824289	0.987602	0.699671	0.889848	0.538374	1.07029	0.703206	0.645684	0.968484	0.89232	0.650551	1.6621	0.822387	0.927432	0.693505	0.539258	0.688614	0.824527	0.875119	0.462877	0.720354	0.845192	0.602098	0.766093	0.670485	0.63293	0.6318	0.731687	0.813474	0.814985	0.704778	0.617906	0.701405	1.04349	1.00457	0.738598
	0.8025	0.739733	0.822811	1.00266	0.96266	0.946264	0.883915	0.605788	0.726188		0.793861	1.02033	0.791735	1.0057	0.595042	1.04158	0.690383	0.629043	0.805482	0.921303	0.730904	1.50808	0.804503	0.998497	1.09867	0.598002	0.704033	0.83316	1.09258	0.48841	0.689534	0.790676	0.649769	0.763803	0.980387	0.712061	0.600481	0.749801	0.862153	0.863922	0.73807	0.638295	0.764741	0.873174	1.10514	0.68294
	0.857042	0.512246	0.817376	1.08657	1.10183	0.831548	0.90508	0.717768	0.777567		0.801401	1.00669	0.822146	0.766399	0.742401	1.12845	0.646424	0.653117	0.730803	0.7379	0.904303	1.23771	0.772119	0.772296	0.880057	0.67341	0.735108	0.835298	1.14319	0.501357	0.691314	0.735825	0.721045	0.758462	1.32273	0.740833	0.595325	0.826974	0.908798	0.755664	0.779338	0.663799	0.989471	0.809399	0.945602	0.635219
	0.876211	0.608676	0.888989	1.17456	1.23883	0.87342	0.87025	0.785334	0.838065		0.810059	0.898471	0.654136	0.759859	0.747609	1.04302	0.611453	0.759948	0.713064	0.785809	0.628146	0.97087	0.732581	0.867139	0.757137	0.765703	0.755085	0.828439	0.900274	1.15154	0.745325	0.715615	0.618725	0.843325	1.50961	0.896278	0.603769	0.91351	0.928409	0.713202	0.804904	0.74055	0.8415	0.782685	0.879276	0.607137
	0.784067	0.690996	0.96841	1.22043	1.34874	0.980661	0.753654	0.767305	0.771079		0.803437	1.31686	0.571727	0.798779	0.628665	0.931585	0.605522	0.672606	0.707387	0.851553	0.698874	0.786286	0.689267	1.06863	0.69498	0.871285	0.911792	0.790719	0.93127	0.936973	0.839795	0.853667	0.544405	0.723267	1.42778	0.7914	0.628566	0.917367	0.871509	0.706993	0.756072	0.781714	0.790353	0.745089	0.888078	0.885152
	0.749483	0.760042	0.976649	1.18964	1.37087	1.06255	0.677254	0.705357	0.761011		0.774358	1.24951	0.562995	0.82918	0.613914	0.888076	0.636117	0.653387	0.710654	0.843627	0.708009	0.691538	0.657853	1.22791	0.649196	1.00143	0.777485	0.924753	0.643837	0.76699	0.937792	0.905537	0.56187	0.662829	0.495748	0.71869	0.647682	0.919736	0.760944	0.75095	0.750114	0.728311	0.789681	0.709564	0.944438	0.762068
	0.670677	0.805998	1.27092	1.08619	0.643278	1.07414	0.644336	0.603412	0.744092		0.742189	1.10627	0.608805	0.884849	0.529834	0.954104	0.84786	0.668568	0.738106	0.821873	0.686828	0.653082	0.683441	1.18534	0.601572	0.766765	0.734403	0.802497	0.613047	0.585632	0.959422	0.894713	0.606995	0.683755	0.6673	0.591686	0.55592	0.918916	0.743979	0.889933	0.745622	0.682477	0.797266	0.721589	1.11227	0.745228
	0.591907	0.842493	1.13511	0.955882	0.730526	1.00598	0.775316	0.659578	0.731099		0.730037	0.997781	0.675525	0.968671	0.468915	1.09802	0.735558	0.682625	0.834095	0.846181	0.697695	0.656668	0.718135	0.982919	0.57218	0.619006	0.718595	0.756489	0.691868	0.46824	0.923823	0.823243	0.669312	0.72405	0.949193	0.53913	0.537193	0.923692	0.705772	0.794732	0.714937	0.687627	0.788781	0.775051	0.94758	0.715491
	0.645382	0.866556	0.941752	0.824142	0.838538	1.94819	1.0955	0.761352	0.725906		0.740148	0.943683	0.733846	0.784417	0.459944	1.16625	0.70812	0.666897	0.726882	0.858881	0.728669	0.713142	1.58049	0.825462	0.582076	0.522937	0.712314	0.751506	0.758133	0.457825	0.972876	0.747267	0.861252	0.729129	1.24287	0.548097	0.92395	0.924121	0.770967	0.744281	0.678998	0.633754	0.74253	0.827797	0.825491	0.670811
	0.719884	0.855382	0.796826	0.98843	0.976548	1.94073	0.759263	0.755201	0.725734		0.731917	0.871565	0.756364	0.740698	0.477244	1.11306	0.722286	0.646115	0.724191	0.656058	0.695477	0.808531	1.29517	0.820415	0.635428	0.490599	0.699374	0.765502	0.722132	0.496938	0.790829	0.725097	0.604538	0.710075	1.40495	0.636492	0.786256	0.904211	0.820647	0.760727	0.657458	0.684486	0.666512	0.808513	0.776152	0.645541
	0.885168	0.831935	0.78005	1.11993	1.12721	1.73493	0.845679	0.702907	0.738656		0.693519	1.48869	0.740074	0.757401	0.5175	1.27766	0.747375	0.648461	0.75477	0.76309	0.647452	0.847472	1.10532	0.984498	0.722679	0.519155	0.926557	0.77798	0.648424	0.509358	0.699617	0.760618	0.555903	0.699813	1.33782	0.724495	0.691907	0.861014	0.867493	0.828847	0.746802	0.78353	0.677951	0.770383	0.796938	0.661042
	0.682222	0.767294	0.859877	1.22514	1.27195	1.43264	0.886433	0.60612	0.770356		0.962821	1.46425	0.710421	0.77154	0.566659	1.22189	0.738425	0.701617	0.7589	0.874014	0.63971	1.53842	0.9566	0.826343	1.23768	0.570431	0.844562	0.787089	0.684192	0.967843	0.649624	0.733426	0.579273	0.718481	0.500618	0.777328	0.63812	0.797493	0.889157	1.00452	0.821613	0.810001	0.692039	0.770166	0.864585	1.14191
	0.722565	0.708061	0.956083	1.25628	1.34768	1.13375	0.872779	0.725995	0.822194		1.02051	1.2991	0.718099	0.734245	0.698379	1.09376	0.677301	0.764905	0.731036	0.882369	0.712671	1.34306	0.856944	0.679784	1.00186	0.645144	0.784748	0.772153	0.836886	0.763678	0.625452	0.805442	0.628003	0.801649	0.66138	0.804195	0.608528	0.751051	0.863742	0.792674	0.73843	0.802972	0.725718	0.757131	0.950288	0.860076
	0.768747	0.537509	0.979445	1.18237	1.30316	0.959616	0.798788	0.737817	0.755315		0.895441	1.08342	0.906169	0.74352	0.772056	0.999796	0.623739	0.684821	0.69794	0.823132	0.865189	1.09695	0.820171	0.815355	0.804456	0.728194	0.736956	0.978987	1.03027	0.59852	0.63178	0.881817	0.686931	0.649185	0.881352	0.722243	0.599856	0.782651	0.698805	0.837369	0.738292	0.749888	0.905335	0.700874	0.982841	0.764782
	0.824087	0.672068	1.32447	1.03535	0.54334	0.946422	0.692131	0.69579	0.772971		0.810413	1.46917	0.706958	0.784236	0.78515	0.97727	0.616864	0.659306	0.641467	0.786716	1.14483	0.889967	0.825013	1.08273	0.687299	0.831175	0.69243	0.825255	1.12237	0.471936	0.678444	0.888528	0.809623	0.631316	1.0901	0.643112	0.622741	0.873243	0.690724	0.940165	0.738496	0.756602	0.766414	0.688635	0.859223	0.763258
	0.880604	0.790742	1.17845	0.877966	0.602144	1.01747	0.632876	0.603665	0.77948		0.789524	1.52587	0.589781	0.853533	0.713513	1.0423	0.652362	0.655749	0.614325	0.785214	0.608171	0.758387	0.813365	1.32953	0.61621	0.927808	0.994908	0.745593	0.954297	0.434393	0.754426	0.812396	0.627294	0.670378	1.20504	0.586389	0.654153	0.913092	0.723283	1.09555	0.704755	0.663835	0.722248	0.735292	0.754557	0.732773
	0.898171	0.891524	0.976653	0.727147	0.665089	1.0821	0.713128	0.688057	0.781859		0.801858	1.44096	0.556342	0.949844	0.614381	1.34115	0.802006	0.662753	0.767017	0.640705	0.710286	0.652742	0.789873	1.33216	0.570626	0.737712	0.892888	0.71386	0.840829	0.480299	0.816678	0.732074	0.589821	0.703863	1.16935	0.568518	0.662191	0.885408	0.777185	0.927235	0.660973	0.732808	0.731406	0.797929	0.707136	0.673771
	0.859956	0.926452	0.822581	0.962976	0.750345	1.91326	0.982058	0.713748	0.77304		0.819949	0.794922	0.590552	0.836778	0.531878	1.30398	0.713677	0.664	0.762097	0.635163	0.737601	0.671102	0.751921	1.08998	0.557599	0.606242	0.817191	0.711367	0.638371	0.527401	0.837342	0.720747	0.610931	0.685868	0.540574	0.653298	0.87626	0.902304	0.81146	1.02441	0.659265	0.812709	0.759551	0.773476	0.726958	0.65501
	0.776078	0.984467	0.802531	1.1058	0.862252	1.83927	0.67825	0.687075	0.75144		0.808416	0.860156	0.66986	0.743932	0.483367	1.20342	0.707426	0.674374	0.745954	0.771432	0.712999	0.680727	0.716856	0.863874	0.551415	0.524087	0.741946	0.715212	0.640384	0.882591	0.814686	0.784154	0.651016	0.663998	0.656405	0.746345	0.786334	0.933293	0.836115	0.84525	0.711538	0.834878	0.770469	0.771906	0.79035	0.720049
	0.683744	0.98532	0.889326	1.20592	0.998899	1.6279	0.774432	0.596018	0.733949		0.772046	0.782079	0.762105	0.718543	0.470688	1.04723	0.750384	0.706591	0.69134	0.894231	0.711393	0.765842	0.710531	0.788365	0.636036	0.511264	1.15	0.707245	0.720589	0.654625	0.74814	0.695878	0.786687	0.668414	0.788346	0.839863	0.731082	0.962292	0.84718	0.807841	0.791014	0.808242	0.75602	0.769284	0.874281	1.36907
	0.626873	0.958862	0.988543	1.21101	1.13691	1.32588	0.823776	0.635698	0.742637		0.731169	0.682395	0.812434	0.757639	0.47908	1.3435	0.77958	0.787051	0.616096	0.833353	0.727817	0.879811	0.615744	0.867931	0.725055	0.557636	1.03297	1.06438	0.782581	0.491822	1.16079	0.703645	0.650851	0.732006	0.935611	0.726426	0.685335	0.977588	0.634129	0.865062	0.730325	0.793737	0.728814	0.711993	0.954606	1.07503
	0.642521	0.889551	1.0042	1.11065	1.23562	0.950589	0.828699	0.679749	0.784527		0.706535	0.621512	0.784989	0.831345	0.508294	1.29246	0.741874	0.731077	0.597173	0.772469	0.706835	0.882075	0.681423	0.696975	1.12139	0.626206	0.93441	0.895829	0.74098	0.419077	0.861896	0.753464	0.635538	0.664502	1.00636	0.68884	0.657023	0.979056	0.683591	0.859229	0.722129	0.687823	0.701273	0.671248	0.828009	0.861817
	0.746765	0.799947	1.31604	0.944162	1.24762	0.831615	0.782161	0.663997	0.771981		0.682156	0.624713	0.724432	0.926975	0.563358	1.16747	0.666781	0.709164	0.623878	0.745596	0.658095	1.35212	0.680885	0.631331	0.860121	0.70733	0.837514	0.774661	0.648939	0.461075	0.707305	0.810664	0.651829	0.589359	1.00315	0.658067	0.678792	0.968807	0.741505	0.821905	0.722421	0.706114	0.693043	0.687496	0.806336	0.812796
	0.689233	0.737369	1.19325	0.779912	1.13341	0.775372	0.700602	0.618986	0.814102		1.0849	0.848599	0.721065	0.981645	0.6271	0.965854	0.622117	0.670082	0.771539	0.717352	0.651709	1.18838	0.712045	0.784634	0.68228	0.795794	1.16848	0.698176	0.649673	0.547135	0.640135	0.809031	0.668776	0.628703	0.641038	0.653343	0.719769	0.911052	0.777716	0.792812	0.693023	0.780659	0.702925	0.754815	0.718467	0.810667
	0.748584	0.734821	1.02469	1.04701	0.485212	0.807425	0.638298	0.613416	0.822321		1.09115	1.02891	1.01576	0.907007	0.702938	0.842353	0.633347	0.656734	0.789331	0.678856	0.721667	1.00657	0.718696	1.06548	0.584885	0.910177	1.07804	0.661012	0.756762	0.58958	0.606336	0.751116	0.783095	0.687335	0.734663	0.692165	0.730691	0.818892	0.803183	0.819666	0.651081	0.816874	1.1327	0.785455	0.666939	0.752058
	0.789259	0.714634	0.898311	1.11604	0.529899	0.916577	0.674702	1.04191	0.818842		0.915541	1.00147	0.79345	0.826215	0.785583	0.802138	0.690966	0.673485	0.77742	0.662826	0.877698	0.773271	1.66656	1.34654	0.537924	0.902797	1.26763	0.638428	0.911902	0.841752	0.596945	0.705644	0.681898	0.691568	0.806816	0.786945	0.868791	0.771626	0.826579	0.862038	0.635171	0.788864	0.844842	0.773132	0.675938	0.665904
	0.834603	0.872012	0.885979	1.05765	0.575717	1.05985	0.878658	0.971407	0.790952		0.823536	0.838157	0.646226	0.749344	0.797673	0.769748	0.811877	0.715521	0.729927	0.797677	1.14405	0.6836	1.28396	1.39265	0.511934	0.759498	0.915932	0.973628	1.05421	0.601686	0.612511	0.712479	0.677441	0.65358	0.846122	0.817468	0.844656	0.809972	0.582916	0.850287	0.653814	0.756403	0.705431	0.721472	0.727775	0.658086
	0.875616	1.00311	0.974659	0.995238	0.622623	1.15313	0.648846	0.889953	0.743878		0.79177	0.700879	0.591153	0.736607	0.72121	1.0387	0.736799	0.754534	0.663259	0.909132	0.594691	0.690428	1.05413	1.1742	0.541034	0.647351	0.852966	0.817621	0.78492	0.450764	0.645427	0.785398	0.676073	0.637437	0.860843	0.732273	0.808166	0.898663	0.655069	0.823732	0.735302	0.658022	0.667203	0.687443	0.80094	0.770821
	0.889737	1.08446	1.06743	0.842919	0.679083	1.00469	0.715424	1.01074	0.711419		0.822915	0.643203	0.609238	0.804956	0.624055	0.971446	0.741355	0.801917	0.615452	0.858284	0.693477	0.694975	0.913166	0.930148	0.606374	0.584119	0.752391	0.687629	0.649385	0.437556	0.688275	0.841016	0.713407	0.677886	0.61557	0.73719	0.76252	0.975897	0.729796	0.822059	0.697314	0.718958	0.691532	0.685039	0.86615	0.979667
	0.864828	1.10666	1.06096	0.680855	0.762244	0.851551	0.743274	0.969934	0.713088		0.841587	0.682246	0.681723	0.913575	0.545224	0.811044	0.788792	0.874345	0.566323	0.787682	0.737556	0.749708	0.848601	0.80673	0.69306	0.587312	0.666304	0.596927	0.657515	0.549661	0.720465	0.754416	0.840697	0.804514	0.664833	0.728038	0.757348	0.900661	0.769085	0.856756	0.69476	0.795781	0.731073	0.767662	0.877306	1.23193
	0.797357	1.07641	1.28144	0.95615	0.873389	0.729264	0.731846	0.883819	0.763165		0.831392	0.69254	0.769273	1.01867	0.508179	0.716943	0.808813	0.731982	0.617808	0.711121	0.731254	0.8556	0.807083	0.813014	1.21011	0.639316	0.657964	1.19177	0.71896	0.662822	0.729877	0.709931	0.823398	0.58433	0.702805	0.747843	0.812516	0.868912	0.797951	0.878715	0.661817	0.78812	0.754502	0.738427	0.827728	0.974572
	0.712305	1.01367	1.15674	0.948534	0.994239	0.660544	0.689389	0.746481	0.868489		0.763771	0.883376	0.806081	1.02124	0.493751	0.704106	0.739152	0.6677	0.639142	0.67464	0.727397	0.934537	0.74315	0.949786	0.915197	0.708357	0.723765	1.01212	0.76704	1.01355	0.724396	0.70487	0.775288	0.593665	0.725851	0.830905	0.994835	0.900955	0.823447	0.837771	0.660723	0.738418	0.744669	0.71799	0.756594	0.865632
	0.66391	0.919475	1.05368	0.955152	1.09637	0.678165	0.644757	0.914725	0.869428		0.674933	1.13142	0.739362	0.909434	0.491029	0.716979	0.649481	0.659404	0.818175	0.721313	0.727265	0.858075	0.738559	0.672867	0.691135	0.782362	0.770567	0.826395	0.727918	0.804717	0.702518	0.710406	0.735813	0.66473	0.745663	0.865366	1.01487	0.963469	0.646608	0.828648	0.649454	0.693167	0.719642	0.701714	0.71055	0.877733
	0.706288	0.821311	0.976877	0.866885	1.14163	0.785157	0.652889	0.940193	0.835395		0.607209	1.23662	0.686699	0.859253	0.516049	0.718972	0.623184	0.724053	0.79781	0.70187	0.697862	1.07604	0.689	0.666202	0.573847	0.878413	0.795507	0.703087	0.636746	0.570193	1.25388	0.714318	0.739535	0.727396	0.95545	0.83629	0.873857	1.0084	0.718738	0.799489	0.659451	0.628891	0.697295	0.752631	0.654898	0.816969
	0.783953	0.762572	1.02575	0.741351	1.08178	0.924083	0.809333	0.915898	0.776103		1.09856	1.07339	0.722166	0.815967	0.648795	1.00232	0.676903	0.815391	0.800223	0.808057	0.670325	0.983209	0.609704	0.807123	0.516728	1.0201	0.767864	0.648494	0.61209	0.449112	0.975196	0.705127	0.885523	0.693075	1.03977	0.818446	0.851993	1.01861	0.77101	0.818637	0.745747	0.702966	0.687658	0.735626	0.642004	0.796209
	0.811145	0.776257	1.11109	0.59726	0.496914	1.03738	0.546008	0.868952	0.683304		0.928482	0.846047	0.94098	0.778408	0.703102	0.854552	0.793	0.883105	0.765083	0.900863	0.682809	0.8516	0.647735	1.04639	0.504483	0.896763	0.712211	0.693481	0.673648	0.503941	0.763844	0.690623	0.692954	0.637251	0.90407	0.820658	0.858196	1.00497	0.807829	0.824263	0.672379	0.777232	0.690993	0.625945	0.674333	0.682927
	0.833473	0.863007	1.19012	0.860576	0.529288	1.06953	0.622557	0.793551	0.68977		0.838361	0.708927	0.754826	0.806602	0.776358	0.708655	0.894071	0.931143	0.697962	0.935185	0.756519	0.659434	0.667787	1.28531	0.528556	0.80323	0.658656	1.12917	0.801446	0.663797	0.633033	0.697108	0.660171	0.639521	0.926468	0.904495	0.904164	0.97576	0.832931	0.852322	0.671928	0.786189	1.11201	0.648337	0.730428	0.666826
	0.855444	0.709025	1.15531	0.818686	0.569913	1.05303	0.659055	0.663287	0.69549		0.85608	0.659106	0.670891	0.913317	0.779047	0.630933	0.779639	0.651712	0.636783	0.888301	0.90596	0.592854	0.703944	1.35199	0.577745	0.724706	0.659231	1.02195	0.957736	0.783794	0.595943	0.732955	0.676291	0.716665	0.992403	0.893455	0.737932	0.92721	0.769346	0.875331	0.681843	0.728932	0.819142	0.688102	0.784551	0.802426
	0.864796	0.908911	1.24151	0.814903	0.600785	0.925795	0.659793	0.786681	0.760511		0.898381	0.710629	0.663356	1.04576	0.705914	0.634033	0.781322	0.793279	0.642511	0.773545	0.603454	0.687768	0.686641	1.205	0.639272	0.681683	0.709106	0.873062	0.71219	0.902144	0.584668	0.799606	0.70277	0.576873	1.02962	0.787754	0.754757	0.846287	0.818498	0.832399	0.694489	0.617309	0.66926	0.765918	0.912563	1.00052
	0.852454	1.05962	1.24223	0.74656	0.632492	0.802887	0.640628	0.822995	0.933755		0.913289	0.698925	0.707284	1.1316	0.613603	0.671519	0.823918	0.935034	0.635401	0.692458	0.667278	0.812198	0.663038	0.995562	0.701356	0.692466	0.654141	0.73092	0.661056	0.751096	0.593557	0.870797	1.3423	0.641447	0.934785	0.757728	0.789172	0.791929	0.86425	0.844602	0.712767	0.68099	0.630909	0.597307	0.826351	1.01872
	0.815605	1.13222	1.14915	0.647765	0.685862	0.685237	0.640475	0.843624	0.920095		0.844242	0.644254	0.750466	1.27848	0.548191	0.710992	0.832921	1.03332	0.618672	0.739624	0.713704	0.934083	0.681256	0.846849	0.956081	0.741754	0.699529	0.641457	0.653014	0.565233	0.610886	0.789776	0.830973	0.741418	0.961969	0.75424	0.808982	0.824435	0.99082	0.790021	0.770074	0.757029	0.659983	0.664918	0.80262	0.789869
	0.771834	1.18364	1.13045	0.783978	0.770067	0.600361	0.765941	0.819094	0.849907		0.715481	0.718368	0.723985	1.32704	0.523301	1.0931	0.742871	1.09045	0.618402	0.729359	0.727579	0.943192	0.695319	0.780654	0.69002	0.807917	0.708656	0.613566	0.686706	0.509252	0.636784	0.750701	0.641692	0.774356	0.948319	0.833825	0.806934	0.904486	0.937509	0.786484	0.663836	0.792329	0.708047	0.745474	0.771991	0.864716
	0.766837	1.12703	1.20701	0.749401	0.876531	0.60116	0.469776	0.786325	0.760484		1.08996	0.814237	0.638187	1.29791	0.512328	0.935701	0.645563	0.845613	0.87047	0.79345	0.730635	0.80604	1.31521	0.770446	0.578568	0.880419	0.683605	0.638227	0.719206	0.614034	0.648932	0.727962	0.605011	0.710896	1.03125	0.766502	0.800896	0.985677	1.05601	0.777938	0.67086	0.641518	0.725991	0.773697	0.720416	0.938698
	0.838753	1.02439	1.2769	0.701399	0.976953	0.691992	0.56991	0.718983	0.679459		0.99157	0.867709	0.634484	1.13134	0.505009	0.771162	0.651329	1.02555	0.816962	0.873867	0.710385	0.924411	1.05605	0.874715	0.507284	0.950705	0.650726	0.682522	0.684921	0.775818	0.649136	0.712222	0.634966	0.647053	1.01603	0.812459	0.851611	1.0034	0.956231	0.820204	0.701351	0.690511	0.708127	0.770422	0.659062	0.96488
	0.839094	0.909921	1.32395	0.639941	1.03504	0.836472	0.615241	0.797229	0.675584		0.981849	0.871351	0.745456	0.933407	0.533616	0.648609	0.770776	1.16223	0.785896	0.926707	0.681977	0.772894	0.915923	0.76228	0.48342	0.88323	0.648716	0.936298	0.613498	0.865334	0.650112	0.683622	0.687794	0.655942	1.07602	0.870756	0.648367	0.907649	0.904454	0.838064	0.743383	0.768472	0.681219	0.764406	0.628464	0.858248
	0.836625	0.822021	1.2795	0.761798	1.02011	0.958252	0.621933	0.748722	0.704729		1.00707	0.892386	0.906772	0.823156	0.703085	0.5896	0.965868	1.26802	0.727833	0.908568	0.676485	0.669808	0.840863	0.789595	0.496679	0.839083	0.694178	0.844663	0.589105	0.807036	0.654168	0.652035	1.26329	0.756369	1.13201	0.898683	0.670451	0.870141	0.89098	0.846245	0.801735	0.8215	0.66489	0.733995	0.637275	0.710355
	0.831357	0.783245	1.26059	0.696394	0.918085	1.03521	0.628462	0.772653	0.989055		1.00783	0.996424	0.769166	0.792147	0.612891	0.593558	0.997887	0.865684	0.66268	0.729382	0.714442	0.619687	0.794169	0.89647	0.542358	0.795418	0.759134	0.742059	0.620902	0.726189	0.671603	0.645778	0.796471	0.626689	1.13138	1.03916	0.739531	0.899814	0.810062	0.843343	0.679648	0.750214	0.673053	0.556659	0.679731	0.671771
	0.825221	0.811488	1.29522	0.623051	0.590893	1.04724	0.459619	0.760781	0.986741		0.956329	1.21367	0.720983	0.795386	0.696445	0.635639	0.853302	1.06159	0.643175	0.749328	0.799146	0.796666	0.739766	1.03813	0.597144	0.776542	0.590735	0.654062	0.695436	0.64051	1.09524	0.677024	0.615544	0.706787	1.03946	0.762011	0.814619	0.972695	1.06828	0.866593	0.690231	0.801427	0.664947	0.622462	0.724765	0.786584
	0.831628	0.91681	1.39775	0.548507	0.525861	1.01237	0.552541	0.748878	0.888905		1.17066	1.41758	0.716701	0.833235	0.741012	0.6854	0.835714	1.23572	0.652859	0.83609	0.948972	0.900085	0.657551	1.17669	0.648646	0.792123	0.632653	0.598517	0.751796	0.659283	0.962703	0.740435	0.583589	0.791351	1.12908	0.775241	0.844257	1.01482	0.991902	0.76677	0.712631	0.719081	0.737861	0.753885	0.857129	0.967289
	0.867774	0.718783	1.44201	0.705488	0.548801	0.936707	0.593143	0.719194	0.779103		1.2873	1.33051	0.695271	0.940776	0.733348	0.738538	0.867792	1.35203	0.638071	0.739747	0.665068	0.893575	0.597794	1.23785	0.98818	0.842199	0.662124	0.578996	0.66585	0.763062	0.80599	0.803173	0.617845	0.801102	1.24879	0.884656	0.807939	1.01425	0.931059	0.758461	0.798405	0.772723	1.12607	0.878063	0.804818	0.863307
	0.858498	0.899363	1.42987	0.598517	0.583797	0.874805	0.614453	0.617343	0.70424		1.06319	1.03694	0.844353	1.08909	0.661896	0.970237	0.858562	1.01282	0.617656	0.745181	0.671793	0.784192	0.535845	1.17049	0.735918	0.915068	0.662032	0.607177	0.635512	0.864919	0.679187	0.93689	0.693258	0.735733	1.23663	0.98509	0.751519	0.978293	0.879639	0.779058	0.877069	0.919417	0.816523	0.887423	0.802023	0.807865
	0.83056	1.02981	1.30792	1.09126	0.608091	0.786674	0.905697	0.74381	0.680826		0.860962	0.814837	0.738039	1.20067	0.576671	0.967025	0.754456	1.231	0.61023	0.797795	0.692575	0.697669	0.597933	0.979402	0.586278	0.988352	0.64665	0.63698	0.632285	0.752636	0.602014	0.806135	0.765977	0.681079	1.26831	1.04556	0.755708	0.943428	0.859995	0.81383	0.722021	0.704638	0.65615	0.82402	0.789214	0.868149
	0.798222	1.16933	1.42551	1.05482	0.618656	0.681554	1.00806	0.735145	1.07645		0.705383	0.697112	0.543487	1.22855	0.532895	0.846893	0.659984	0.61388	1.04149	0.843515	0.710423	0.774274	0.643747	0.865016	0.506452	0.880024	0.645229	0.671914	0.666495	0.772658	0.578827	0.767765	1.16713	0.698973	1.07114	0.901629	0.652714	0.931988	0.87696	0.821389	0.72326	0.728194	0.60997	0.772022	0.738118	0.982131
	0.800398	1.19824	1.44501	1.06509	0.642114	0.590619	0.795332	0.694774	0.962051		1.41658	0.676247	0.589455	1.14902	0.526991	0.726275	0.706705	0.637331	0.902855	0.842865	0.713965	0.869559	0.69524	0.743582	0.472254	0.849493	0.6951	0.883495	0.644334	0.8201	0.58642	0.752536	0.760006	0.799243	1.25172	0.736294	0.594763	0.875532	0.989779	0.821608	0.775457	0.758514	0.634147	0.797249	0.670423	0.978157
	0.756461	1.12841	1.56308	1.12589	0.702044	0.567712	0.916531	0.709466	0.836335		1.24573	0.661495	0.658416	1.20559	0.529384	0.635989	0.889872	0.662899	0.819645	0.882935	0.702138	0.861315	0.678133	0.653353	0.48135	0.84138	0.783108	0.778565	0.602435	0.889288	0.606348	0.739621	0.611938	0.699499	1.41836	0.789905	0.657812	0.814686	0.955968	0.816847	0.848469	0.851246	0.681229	0.953297	0.629749	0.899092
	0.716814	1.00111	1.56922	1.00907	0.791944	0.641966	1.00803	0.71083	0.73879		0.999776	0.646806	0.701199	1.16951	0.528366	0.58378	0.948705	0.677931	0.745668	0.851465	0.682881	0.801046	0.648881	1.03637	0.525191	0.831934	0.886874	0.70422	0.585639	0.94322	0.622059	0.7106	0.594677	0.757959	1.50634	0.935774	0.792511	0.817456	0.935776	0.839094	0.741613	1.08066	0.700318	0.58616	0.637154	0.722921
	0.641946	0.879032	1.49694	1.00029	0.884613	0.77164	1.01524	0.695502	0.697563		0.810163	0.76737	0.617089	1.19561	0.811528	0.576641	0.937445	0.64399	0.677802	0.797476	0.690968	0.776304	0.651213	0.87032	0.58457	0.837586	0.599524	0.640499	0.594463	0.93591	0.640154	0.675339	0.637951	0.813806	1.46859	1.082	0.910968	0.870055	0.911548	0.757897	0.741078	0.711555	0.677766	0.611033	0.675908	0.65093
	0.722052	0.809737	1.33788	1.023	0.952347	0.90377	0.780093	0.62688	1.16938		0.670113	0.944525	0.594825	1.18186	0.696377	0.600986	0.943023	0.716593	0.638977	0.76551	0.748223	0.817475	0.674408	0.879221	0.645368	0.867296	0.577879	0.594479	0.789698	0.7794	0.638465	0.647732	0.731446	0.817453	1.36894	1.19746	0.944427	0.94458	0.861905	0.74383	0.80079	0.741839	0.647672	0.698941	0.729154	0.748643
	0.71092	0.803172	1.50619	1.05649	0.970272	1.00764	0.848075	0.694261	1.05692		0.622326	1.11593	0.614628	1.02938	0.644643	0.645204	0.889657	0.746523	0.635052	0.727074	0.84347	0.819185	0.699444	0.948973	0.757151	0.927393	0.599586	0.574387	0.680727	0.921829	0.615107	0.661815	0.826668	0.773164	1.55232	1.25692	0.867942	1.05551	0.825586	0.760667	0.875197	0.750617	0.642348	0.835864	0.83229	0.943439
	0.6699	0.858585	1.61116	1.28431	0.922941	1.07301	0.907923	0.689582	0.918805		0.666429	1.19319	0.642483	0.834172	0.657577	0.694382	0.765665	0.781787	0.626915	0.762812	0.975006	0.8346	1.32553	1.00824	0.589869	0.877412	0.633782	0.574822	0.619209	1.05445	0.594161	0.729275	0.706181	0.736983	1.61086	1.2209	0.770807	0.939761	0.837642	0.792965	0.67233	0.778918	0.649103	0.953216	0.793866	0.790292
	0.617777	0.993672	1.66597	1.02908	0.659053	0.863744	0.928791	0.68321	0.786242		1.34115	1.1897	0.765042	0.726333	0.680005	1.0318	0.689969	0.743341	0.615056	0.752588	0.796693	0.956736	1.10883	1.03407	0.505185	0.797121	0.651358	0.585525	0.616695	1.12704	0.598743	0.821414	0.613402	0.756977	1.56632	0.847332	0.731515	0.881674	0.892287	0.80735	0.726448	0.880453	0.727328	0.937756	0.808497	0.79167
	0.575076	0.813853	1.64764	0.988497	0.578177	0.836063	0.705582	0.685027	1.06668		1.37327	1.22552	0.724386	0.715815	0.665829	0.957277	0.773418	0.62641	0.6084	0.769148	0.740319	0.962209	0.941509	1.00275	0.473395	0.795705	0.645787	0.605359	0.630332	1.10358	0.644904	0.914268	0.627138	0.799779	1.44397	0.739613	0.793131	0.868273	0.888564	0.791042	0.833067	0.629217	1.1621	0.835051	0.804126	0.892997
	0.723997	1.01619	1.524	1.00644	0.591428	0.822814	0.732281	0.693533	0.97803		1.16489	1.37202	0.683183	0.780353	0.599647	0.918957	1.00145	0.520543	0.609423	0.813369	0.725529	0.952031	0.829821	1.09301	0.484976	0.814741	0.648665	0.631053	0.624954	0.962747	0.95636	0.901293	0.692753	0.785833	1.62904	0.794302	0.854617	0.906499	0.864598	0.79009	0.901753	0.708998	0.817644	0.746264	0.752557	1.01583
	0.698752	1.13361	1.34387	1.035	0.628709	0.740195	0.766586	0.68754	1.29545		0.944403	1.56494	0.66169	0.929317	0.531214	0.852062	1.05737	0.776653	1.12324	0.814424	0.723136	0.899842	0.75963	1.08291	0.533285	0.836549	0.709314	0.794493	0.609542	0.896658	0.873545	0.810584	0.789469	0.818089	1.75016	0.952177	0.632138	0.951796	0.885991	0.823076	0.838542	0.759127	0.635872	0.753051	0.676981	1.0334
	0.633215	1.16979	1.55563	1.06873	0.651248	0.698516	0.794623	0.633243	1.24841		0.765956	1.55303	0.634038	1.12121	0.511834	0.774712	1.03961	0.822467	0.930475	0.806928	0.719536	0.815956	0.700766	0.983589	0.606159	0.86143	0.836272	0.676994	0.593529	1.09606	0.782536	0.786822	0.668719	0.82566	1.68043	1.15255	0.559885	0.966084	0.887872	0.879712	0.693096	0.758464	0.602869	0.877343	0.642263	0.897866
	0.67314	1.10356	1.65551	1.09985	0.646959	0.605316	0.806827	0.688696	1.45164		0.661131	1.24623	0.622748	1.26412	0.537227	0.703965	0.943325	0.894135	0.804539	0.801238	0.710528	0.92733	0.544776	0.831161	0.693282	0.908016	0.997806	0.609322	0.565329	1.24235	0.686774	0.768101	0.617306	0.818224	1.44273	1.33808	0.650928	0.943907	0.849729	0.748856	0.760812	0.740499	0.620985	0.659757	0.666984	0.707642
	0.65095	0.970574	1.66017	1.43157	0.637828	0.562426	0.787154	0.643482	1.49596		0.640291	0.945401	0.590637	1.31333	0.55811	0.65662	0.807017	0.806206	0.71042	0.732538	0.703015	0.98754	0.595457	0.681651	0.594026	0.77967	0.645113	0.571673	0.735823	1.28662	0.615101	0.736797	0.663958	0.815058	1.45424	1.44695	0.85016	0.924693	0.797821	0.745988	0.704149	0.756812	0.661678	0.619796	0.730851	0.569695
	0.616859	0.854101	1.65231	1.07921	0.664586	0.57394	0.660711	0.652262	1.41223		0.67121	0.762092	0.819141	1.27163	0.567928	0.61579	0.744031	0.629457	0.6535	0.723381	0.729451	1.07042	0.578157	0.903875	0.507181	0.713348	0.58953	0.559361	0.622482	1.20268	0.583226	0.663184	0.751389	0.817479	1.64781	1.11553	1.03197	0.918749	0.795645	0.751804	0.736874	0.830195	0.681528	0.689871	0.803071	0.749478
	0.59085	0.806512	1.49835	0.977918	0.732407	0.725985	0.677586	0.671329	1.14542		0.718383	0.682674	0.749154	1.20997	0.751461	0.577968	0.835866	0.502098	0.636294	0.781742	0.790999	1.05377	0.587522	0.856234	0.483313	0.732251	0.596325	0.56558	0.602745	1.06038	0.585538	0.686792	0.846855	0.812994	1.75373	0.84421	1.05956	0.883321	0.856916	0.755394	0.793002	0.648909	0.664869	0.777616	0.803163	0.976763
	0.595395	0.832629	1.48832	1.00076	0.818226	0.870471	0.693492	0.695421	0.747587		0.907826	0.680981	0.730087	1.08797	0.653182	0.570583	1.0753	0.516835	0.623961	0.764826	0.869459	0.908642	0.633115	0.95097	0.500353	0.77614	0.626441	0.575572	0.624847	1.22778	0.603341	0.693722	0.672194	0.83624	1.67391	0.75082	0.949128	0.829775	0.880605	0.754131	0.823972	0.738199	0.641958	0.878473	0.777569	1.20148
	0.749749	0.924839	1.56955	1.05442	0.892593	1.00492	0.702938	0.718965	1.48466		1.38474	0.733342	0.708757	1.07605	0.601227	0.595925	1.13741	0.761251	0.601915	0.771822	0.957148	0.74692	0.687991	1.05068	0.560683	0.822143	0.653225	0.580043	0.638303	1.3222	0.614135	0.738529	0.63335	0.875799	1.48356	0.783448	0.816259	0.804534	0.812369	0.772461	0.789665	0.803991	0.641352	0.959165	0.776418	0.786196
	0.719786	0.96916	1.63763	1.09245	0.935953	1.1028	0.699314	0.720755	1.49602		1.33164	0.658624	0.720859	1.11895	0.600294	0.636618	1.03494	0.844283	0.591824	0.742369	0.868244	0.923518	0.669547	1.07748	0.650954	0.863325	0.631195	0.590584	0.631233	1.32157	0.629073	0.814764	0.689744	0.806764	1.37717	0.951905	0.751551	0.826975	0.79134	0.810809	0.717999	0.801571	0.676666	0.949239	0.798172	0.825304
	0.688798	1.08395	1.65511	1.10868	0.936255	0.880496	0.690035	0.669152	1.3674		1.13423	0.759346	0.672342	1.09394	0.612447	1.03861	0.905215	0.95437	0.604138	0.735095	0.81445	0.892475	0.610146	1.01638	0.522553	0.91829	0.648426	0.6131	0.575394	1.19057	0.652451	0.920278	0.786169	0.838805	1.60381	1.20999	0.801525	1.08143	0.831992	0.848212	0.659791	0.74119	0.758643	0.861614	0.748402	0.93378
	0.675537	1.12457	1.58097	1.10542	0.758119	0.760395	0.603033	0.592903	1.0777		0.947876	0.97179	0.606073	0.936143	0.596222	1.01425	0.846782	0.967592	0.619726	0.739228	0.781153	1.0115	0.635717	0.950767	0.50397	0.688807	0.729377	0.648185	0.650152	1.27799	0.659609	1.03036	0.859904	0.787859	1.69073	1.45498	0.943219	0.969595	0.856113	0.755436	0.75804	0.70337	1.17753	0.763611	0.676789	0.981608
	0.6767	1.07508	1.53406	1.16026	0.649722	0.73949	0.622231	0.621533	0.705761		0.802975	1.25079	0.566066	0.747936	0.54021	0.969541	0.908588	0.836799	0.944576	0.734695	0.753403	1.14826	0.655876	0.953018	0.530281	0.648248	0.876442	0.910079	0.612419	1.30204	0.624136	0.911155	0.696032	0.801051	1.67463	1.6155	0.923779	0.877604	0.830792	0.720984	0.72499	0.706583	0.813075	0.744157	0.656653	1.01555
	0.663112	0.963481	1.55446	0.971656	0.653213	0.753795	0.635104	0.67313	0.418345		0.717958	1.46724	1.07924	0.648364	0.495521	0.880428	0.663086	0.652519	0.793717	0.730125	0.731795	1.11701	0.674036	0.958967	0.597245	0.679892	1.07274	0.714976	0.645197	1.26003	0.584208	0.855584	0.660816	0.768766	1.40623	1.06376	0.642492	0.813227	0.777262	0.702708	0.741287	0.583794	0.651025	0.812206	0.706029	0.857538
	0.652331	0.867225	1.51913	0.958777	0.694678	0.756345	0.637208	0.735503	1.34939		0.692652	1.52027	0.859878	0.672169	0.511017	0.779548	0.682511	0.537768	0.704593	0.787549	0.733758	0.907935	1.14013	0.889444	0.710371	0.743046	1.2603	0.619195	0.678629	0.986225	0.574463	0.838817	0.713289	0.79119	1.27127	0.847325	0.540246	0.807711	0.774263	0.702061	0.766501	0.704476	0.608081	0.999349	0.792733	0.670023
	0.623663	0.839246	1.02587	1.0168	0.718672	0.712216	0.629959	0.788563	1.35546		0.684158	1.52501	0.741388	0.821759	0.567897	0.711486	0.697934	0.550297	0.66328	0.82404	0.768509	0.715413	0.957151	0.754691	0.567406	0.807585	0.698343	0.56572	0.643912	0.941408	0.956845	0.791966	0.796336	0.782295	1.49565	0.75501	0.629655	0.850926	0.837366	0.715294	0.77907	0.823353	0.620643	0.792253	0.886789	0.623968
	0.605811	0.900361	1.0578	1.12668	0.703301	0.633609	0.619016	0.814773	1.20904		0.67254	1.60486	0.713201	1.03721	0.617898	0.71213	0.71173	0.727445	0.644314	0.731807	1.04818	0.640839	0.823325	0.618201	0.550149	0.870205	0.608956	0.548171	0.639833	0.888805	0.828393	0.729965	0.868769	0.799828	1.46527	0.760585	0.865047	0.897508	0.871875	0.75889	0.757628	0.898553	0.65545	0.667093	0.908871	0.791431
	0.630418	1.03487	0.965081	1.16053	0.66329	0.569601	0.533754	0.766923	0.943206		0.690436	1.72362	0.730917	1.2797	0.682911	0.714173	0.758322	0.772788	0.624194	0.692722	0.956133	1.09756	0.740301	0.805388	0.57267	0.722518	0.602845	0.557551	0.684726	0.803588	0.755411	0.702004	0.708065	0.801552	1.54476	0.945235	0.99641	0.918021	0.727722	0.811292	0.72488	0.862763	0.673328	0.667588	0.762093	1.07362
	0.691565	0.938605	0.857722	1.13911	0.650045	0.594653	0.566394	0.550903	0.654104		0.970768	1.69898	0.731484	1.30997	0.610925	0.665783	0.625194	0.906192	0.602697	0.675949	0.88224	0.860759	0.701568	0.801805	0.641126	0.623585	0.637274	0.577961	0.703837	0.720268	0.688223	0.716603	0.693988	0.772335	1.27161	1.24647	1.13319	0.889607	0.773655	0.853211	0.693589	0.756533	0.663711	0.746729	0.71916	1.32361
	0.782752	1.02059	0.886874	1.08149	0.690854	0.69144	0.584461	0.598807	0.44561		1.35794	1.40597	0.677469	1.31416	0.563117	0.588779	0.627565	1.02409	0.603481	0.670199	0.806981	0.860089	0.679333	0.927026	0.986061	0.597941	0.674324	0.587456	0.774491	0.652355	0.620327	0.760351	0.726684	0.76174	1.32202	1.53195	0.990885	0.859872	0.824212	0.857004	0.678358	0.676112	0.653603	0.821102	0.759915	0.808427
	0.728893	1.09284	1.01259	1.03823	0.765993	0.884466	0.594444	0.688461	0.986582		1.26946	1.07023	0.603031	1.24111	0.548602	0.513262	0.657134	0.936446	0.606635	0.764048	0.753343	1.01283	0.661346	1.04959	0.958971	0.641296	0.684078	0.587108	0.692623	1.0121	0.582623	0.815104	0.77013	0.717226	1.28134	1.72983	0.838372	0.837619	0.825991	0.746438	0.918846	0.65978	0.66131	0.886287	0.763278	0.860337
	0.697179	1.06295	1.14998	0.935792	0.851119	1.04895	0.58583	0.786797	1.1353		1.12441	0.843521	0.569928	1.29178	0.549919	0.551032	0.666233	0.844549	0.632375	0.741626	0.742581	1.16596	0.627667	1.06872	0.912777	0.721409	0.683585	0.593242	0.645669	0.911856	0.587509	0.881786	0.700067	0.754064	1.35475	1.04624	0.777563	0.821714	0.781594	0.698908	0.733052	0.685892	0.702003	0.951018	0.719172	0.920072
	0.698058	0.984879	0.962176	0.981709	0.919673	1.17155	0.580303	0.871019	1.13269		1.01767	0.72435	0.617975	1.06213	0.537753	0.584002	0.669352	0.680183	0.961979	0.784445	0.702526	1.12221	0.606904	0.979889	0.775331	0.816251	0.740928	0.613571	0.704778	0.859624	0.586692	0.971324	0.715126	0.805632	1.03143	0.855832	0.839085	0.803572	0.781231	0.673424	0.704574	0.634806	0.785056	0.978246	0.659642	1.02406
	0.721111	0.92043	0.85447	1.10392	0.953515	0.846908	0.505853	0.915892	1.00405		0.931616	0.652726	1.45684	0.977769	0.506493	0.893451	0.699389	0.594291	0.81629	0.76509	0.719462	0.925479	0.627452	0.880211	0.831338	0.914095	0.882732	0.651313	0.691432	0.825498	0.619866	1.08063	0.725938	0.836478	1.00666	0.755918	1.00625	0.800468	0.828484	0.671607	0.717689	0.787259	0.797656	0.9432	0.658834	0.973119
	0.741531	0.928975	0.74533	1.20205	0.856604	0.709581	0.543245	0.86925	0.807266		0.854441	0.61687	1.37606	1.00344	0.499236	0.937055	1.00094	0.591197	0.725812	0.724349	0.73059	0.744825	0.660003	0.84682	0.833754	0.678577	1.08005	0.797306	0.648267	0.807089	0.620006	1.06098	0.929256	0.816646	1.0874	0.744699	0.952023	1.12879	0.844154	0.701098	0.741688	0.929076	0.655515	0.771117	0.721728	0.813297
	0.72361	1.05986	0.758859	1.2022	0.725222	0.663543	0.566923	0.521117	0.620439		0.774803	0.828113	1.12646	1.05226	0.544994	0.987748	0.697472	0.612902	0.683714	0.640664	0.740746	0.672424	0.665375	0.842279	0.797216	0.548684	1.25703	0.66053	0.624988	0.762434	0.638617	0.927723	0.714869	0.775541	0.877568	0.919072	0.673151	1.05014	0.682333	0.752156	0.748642	0.990752	0.617305	0.772836	0.817177	0.649399
	0.673226	1.10699	0.881669	1.12513	0.716762	0.671253	0.571329	0.590729	0.492807		0.688288	0.711551	0.871648	1.01742	0.619036	0.968555	0.587065	0.704833	0.651633	0.639224	0.726899	0.684166	0.634303	0.783961	0.751884	0.574213	0.750172	0.594513	0.650182	0.72893	0.68006	0.893126	0.677267	0.915789	0.938855	1.23789	0.545871	0.889241	0.71736	0.814047	0.73531	0.902652	0.624281	0.774434	0.905238	0.643313
	0.627865	1.09393	1.05497	1.01686	0.757006	0.701272	0.543754	0.71007	0.903535		0.642737	0.750661	0.721431	0.854494	0.689148	0.861979	0.609535	0.798555	0.627949	0.797153	0.701379	1.07055	0.621626	0.680498	0.573026	0.62793	0.624802	0.568567	0.615876	0.661429	0.694487	0.866695	0.705766	0.726941	0.94882	1.53404	0.603737	0.772535	0.794069	0.882329	0.716773	0.740348	0.643896	0.809282	0.819673	0.849107
	0.611094	1.03784	1.16184	1.19607	0.779631	0.673013	1.00318	0.824827	0.943988		0.681579	0.947233	0.666595	0.683578	0.636657	0.730734	0.64809	0.932344	0.623664	0.758458	0.712652	0.823718	0.630777	0.572758	0.654926	0.720708	0.616366	0.57723	0.625583	0.612336	0.659604	0.802501	0.861969	0.688968	0.906484	1.70684	0.810951	0.733381	0.833067	0.926711	0.706928	0.647178	0.656432	0.752346	0.705553	1.16671
	0.646871	1.00396	0.956332	0.993753	0.753482	0.658064	0.99914	0.912156	0.911642		0.811771	1.25744	0.67413	0.622077	0.583952	0.688165	0.648066	1.07703	0.631353	0.779558	0.764941	0.81764	0.635607	0.737302	0.707557	0.85295	0.658274	0.608138	0.61573	0.594232	0.617595	0.735275	0.685367	0.729808	1.00489	0.882595	1.04456	0.76712	0.812541	0.690616	0.709888	0.639722	0.658446	0.704756	0.69709	1.44855
	0.723063	0.601618	0.753107	0.960864	0.687953	0.607044	0.992758	0.946908	0.813784		0.916457	1.5697	0.68806	0.710796	0.53773	0.734684	0.642481	1.02182	0.625997	0.785078	0.721359	0.970258	0.974933	0.719024	0.718325	0.78194	0.713722	0.633	0.622084	1.05598	0.577942	0.714634	0.647824	0.82153	1.0487	0.774075	1.1003	0.833855	0.800721	0.66883	0.898635	0.68579	0.66417	0.733364	0.712858	0.860665
	0.814878	0.562899	0.688774	1.04941	0.64167	0.646204	1.01885	0.893955	0.697973		1.22379	1.73205	0.629404	0.941575	0.525984	0.770857	0.683298	0.854139	0.651194	0.756524	0.724312	1.10614	0.836301	0.843829	0.697091	0.630228	0.731157	0.631778	0.688091	0.849719	0.888499	0.747531	0.829316	0.890027	0.946533	0.740897	0.88502	0.872182	0.819451	0.674082	0.685354	0.667504	0.680577	0.802468	0.707901	0.837014
	0.75395	0.549506	0.689918	1.18742	0.658266	0.79345	0.991436	0.735236	0.608061		1.16361	1.76776	0.567387	1.20633	0.514589	0.705604	0.777221	0.70937	1.00792	0.71625	0.739017	1.08056	0.758133	0.966365	0.679812	0.570889	0.721435	0.597225	0.752626	0.780138	0.757141	0.80032	0.663057	0.880545	1.06766	0.876884	0.805471	0.843153	0.818744	0.698079	0.652768	0.841658	0.727483	0.848462	0.662678	0.880797
	0.724009	0.550385	0.789582	1.25254	0.728009	0.987393	0.969344	0.603917	0.547905		1.09775	1.83051	0.582013	1.27473	0.517281	0.593744	0.941287	0.648545	0.853794	0.652404	0.74213	0.943122	0.732554	1.00309	0.697709	0.580073	0.749946	0.608211	0.572937	0.756078	0.707629	0.838404	0.897577	0.817151	1.10818	1.16212	0.758548	0.79101	0.811189	0.743996	0.678067	0.988042	0.804048	0.89177	0.619359	0.898902
	0.737725	0.571751	0.969169	1.18317	0.821164	1.1586	0.904254	0.726671	0.88128		1.07963	1.91294	0.642132	1.28316	0.5299	0.526647	0.65523	0.634012	0.751507	0.818793	0.713699	0.825284	0.731381	0.897547	0.62132	0.589219	0.860851	0.623081	0.580242	0.735968	0.631978	0.888259	0.827927	0.882886	1.10689	1.43223	0.862165	0.786218	0.673971	0.812207	0.71503	1.02436	0.791681	0.963492	0.637876	0.974566
	0.782957	0.576601	1.19994	1.05126	0.914557	1.26923	1.01053	0.82931	0.878151		1.07438	1.84335	1.47165	1.20098	0.561707	0.510889	0.562952	0.648746	0.692363	0.761138	0.721021	0.765776	0.723257	0.816228	0.538841	0.747694	1.02685	0.660911	0.602241	0.713206	0.583904	0.970923	0.904009	0.726265	0.975183	1.54019	1.06057	0.811654	0.765557	0.913212	0.72911	0.890105	0.658648	1.04158	0.70517	0.910444
	0.821777	0.576197	1.0305	0.910957	0.980493	1.08587	1.01759	0.895082	0.832358		1.00813	1.51859	1.47174	1.14171	0.622495	0.523781	0.611096	0.689115	0.649379	0.79281	0.736425	0.729422	0.686281	0.808978	0.546011	0.741066	1.1791	0.741319	0.611501	0.689355	0.573475	1.0753	0.871398	0.662117	1.11438	0.928047	0.716937	0.827204	0.823527	1.01777	0.716814	0.706237	0.599246	1.05824	0.789844	0.774464
	0.803585	0.619962	0.863341	1.12324	0.898038	0.883745	0.965511	0.909743	0.75504		0.878924	1.14923	1.25054	1.12137	0.691888	0.879469	0.662038	0.716932	0.626163	0.822462	0.843674	1.41442	0.642884	0.777636	0.588166	0.631923	1.23982	0.646148	0.62893	0.656496	0.587528	1.04279	0.937265	0.696926	1.17943	0.812813	0.59248	0.826803	0.8349	0.673537	0.703411	0.617389	0.608746	0.962506	0.85673	0.649387
	0.736644	0.590631	0.753427	0.998262	0.756973	0.737322	0.910203	0.861792	0.675254		0.729994	0.901616	1.09774	0.934379	0.612157	0.805976	0.656572	0.828139	0.637047	0.820504	0.804613	1.02291	0.516148	0.719198	0.62201	0.597977	0.805153	0.613095	0.682713	0.622019	0.630456	0.930029	0.937149	0.83028	1.16745	0.762446	0.602313	1.21263	0.827977	0.668543	0.705593	0.622612	0.614437	0.840759	0.650326	0.672254
	0.657961	0.589232	0.686076	1.02408	0.73821	0.652042	0.917889	0.731903	0.627183		0.645051	0.774183	0.841159	0.901781	0.574895	0.874362	0.635964	1.00087	0.650099	0.782333	0.742352	0.796296	0.652293	0.64343	0.633446	0.630521	0.630894	0.600805	0.795376	0.594055	0.627189	0.889734	0.969574	0.933618	1.12289	0.843269	0.736991	1.10965	0.819067	0.678885	0.735289	0.699339	0.627894	0.774299	0.647702	0.879481
	0.610766	0.606045	0.672443	1.14424	0.774668	0.629671	1.01273	0.6306	0.610038		0.668567	0.69631	0.683004	0.95949	0.543061	0.962296	0.681338	1.09538	0.644615	0.848177	0.728119	0.766498	0.579367	0.574395	0.628781	0.706291	0.624438	0.66552	0.935298	0.599245	0.619005	0.847		0.925611	1.20314	1.05759	0.913758	0.911842	0.809641	0.695852	0.910046	0.686502	0.646366	0.824343	0.664765	1.19024
	0.619071	0.617706	0.734845	1.2647	0.793482	0.659896	1.00171	0.730263	0.618804		0.781977	0.633728	0.618751	1.01251	0.518163	0.954397	0.797668	1.03752	0.690297	0.769939	0.635722	0.906867	0.630424	0.729809	0.637022	0.827391	0.680208	0.727462	0.590088	0.904307	0.646918	0.786676		0.840183	1.20628	1.26793	0.966807	0.788043	0.808519	0.739166	0.654867	0.843154	0.666089	0.821544	0.654217	1.47538
	0.686754	0.633069	0.887924	1.25665	0.762651	0.701881	0.931708	0.807959	0.962722		0.809995	1.01218	0.609747	0.954179	0.51375	0.836292	0.876808	0.88352	0.908914	0.809434	0.753839	1.01985	0.547277	0.681383	0.682089	0.768566	0.715122	0.755091	0.588896	0.753774	0.702772	0.741542		1.07484	1.0662	1.33871	0.858314	0.74871	0.706404	0.824901	0.617911	0.95715	0.696623	0.745645	0.608534	0.91206
	0.833049	0.615928	1.11978	1.11643	0.689611	0.707631	0.852639	0.850552	0.947762		1.10246	0.839865	0.619392	0.786353	0.544745	0.712834	0.872282	0.754724	0.778654	0.86647	0.729245	1.01569	0.601238	0.764572	0.927146	0.686876	0.78657	0.72582	0.616724	0.722522	0.727334	0.72469		0.849989	1.05554	1.19461	0.731812	0.769072	0.770837	0.958661	0.643239	0.95068	0.755594	0.765419	0.582942	0.868252
	0.777486	0.598542	0.909872	0.945911	0.633224	0.718986	0.870036	0.856483	0.885271		1.09802	0.713411	0.608518	0.650029	0.615038	0.68363	0.628342	0.693886	0.69435	0.882044	0.727556	0.961504	0.601988	0.868274	0.696991	0.675333	0.765153	0.663882	0.632973	0.723159	0.711948	0.754277		0.717676	1.19784	0.998821	0.699329	0.832725	0.805555	0.651262	0.687581	0.80805	0.826361	0.822448	0.619426	0.84178
	0.749494	0.686572	0.793346	0.790411	0.63969	0.808415	0.735868	0.81783	0.785271		1.06355	0.715358	0.588545	0.655583	0.689721	0.755097	0.564019	0.678587	0.636372	0.863448	0.765658	0.924022	0.885439	0.924791	0.582449	0.724045	0.75564	0.624934	0.638136	0.700921	0.675417	0.723997		0.635335	1.22998	0.855784	0.807172	0.870233	0.829715	0.666153	0.711829	0.662356	0.662458	0.871588	0.686394	0.895026
	0.77103	0.641261	0.739379	1.08627	0.705151	0.979218	0.897114	0.709267	0.678433		1.08983	0.876124	0.587213	0.823893	0.738144	0.782739	0.616306	0.707545	0.621309	0.76175	0.794279	0.867774	0.79001	0.916228	0.542164	0.820081	0.821233	0.627085	0.69062	0.651852	0.87671	0.804258		0.653926	1.12232	0.784775	0.679827	0.840835	0.826291	0.702304	0.707737	0.601076	0.600965	0.880145	0.751425	0.892401
	0.829249	0.627454	0.707903	1.0165	0.803157	1.1705	0.974188	0.635853	0.604197		1.12839	1.19293	0.636292	1.08361	0.610073	0.691527	0.677613	0.783697	0.643836	0.806682	0.8448	0.785055	0.761021	0.88186	0.54267	0.966089	0.945664	0.665973	0.811615	0.601333	0.750197	0.86447		0.796636	1.15105	0.822591	0.644745	0.796468	0.81128	0.760036	0.699133	0.605296	0.54167	0.911164	0.783102	0.837825
	0.87406	0.652382	0.68389	1.09523	0.910121	1.32227	0.959515	0.713919	0.587315		1.10137	1.56368	0.74012	1.24935	0.572454	0.581301	0.673561	0.751747	0.654385	0.878731	0.82168	1.31933	0.759006	0.838429	0.557298	0.84054	1.07661	0.960555	0.969998	0.583831	0.661055	0.954627		0.913694	1.25042	0.961432	0.699561	0.792177	0.812322	0.866807	0.702466	0.692804	0.579988	1.00189	0.586491	0.737146
	0.858098	0.699663	0.698536	1.22642	1.00413	1.3839	0.886183	0.776025	0.615023		0.992532	1.78786	1.36895	1.21858	0.54544	0.505434	0.64155	0.74577	0.671351	0.92453	0.78045	0.957314	0.744206	0.778214	0.574143	0.777352	1.15355	0.74411	1.03265	0.596135	0.591134	1.06249		0.907577	1.18787	1.10062	0.782893	0.816895	0.664241	1.02598	0.683781	0.627167	0.615033	1.10366	0.589991	0.65759
	0.784747	0.740896	0.804894	1.30315	0.875034	1.08547	0.799416	0.808623	0.67554		0.848455	1.83424	1.4487	1.10515	0.522148	0.475051	0.681702	0.861445	0.754083	0.949231	0.753763	0.764154	0.71578	0.704733	0.582097	0.789282	0.855185	0.684622	0.719077	0.62178	0.549222	1.05617		0.805299	1.05567	1.15206	0.810621	0.860335	0.735357	0.648482	0.628164	0.704492	0.653799	1.1416	0.616673	0.694265
	0.696443	0.74061	1.00052	1.22043	0.731098	0.999015	0.807141	0.811263	1.03912		0.73211	1.88857	1.42293	1.02039	0.536433	1.4866	0.79087	1.01142	0.973137	0.789403	0.755056	0.75431	0.676203	0.631969	0.585486	0.857318	0.647831	0.682922	0.602856	0.647645	0.565717	0.96841		0.956307	1.21154	1.0903	0.747844	0.881756	0.806646	0.718689	0.628722	0.799084	0.68345	1.0653	0.618488	0.868378
	0.627512	0.702708	1.20992	1.03539	0.705671	0.880157	0.723988	0.774334	0.995376		0.679118	2.00454	1.28221	1.01211	0.620012	1.17368	0.88459	1.08174	0.813612	0.888305	0.755952	0.858452	0.535725	0.588942	0.617028	0.976054	0.630612	0.70211	0.613605	1.00414	0.608175	0.895774		0.80955	1.20604	0.873615	0.667832	1.31996	0.834824	0.783879	0.656896	0.847793	0.692369	0.918223	0.58802	1.12253
	0.608118	0.657089	0.816189	0.847941	0.73662	0.764911	0.84142	0.673387	0.89867		0.67541	1.97899	1.02845	1.00306	0.750051	0.846063	1.11113	1.03202	0.694278	0.975082	0.740068	0.953107	0.539242	0.744096	0.668437	0.887849	0.69519	0.809834	0.6585	0.803165	0.625141	0.834949		0.702965	1.01368	0.793273	0.638027	1.13368	0.810166	0.957174	0.69623	0.808562	0.799609	0.817298	0.58091	1.37145
	0.676687	0.62211	0.746147	0.672588	0.754962	0.696032	0.886145	0.60256	0.76759		0.666941	1.66196	0.776864	0.867846	0.849867	0.782658	0.768655	0.909909	0.636155	1.04079	0.750187	0.983928	0.648481	0.698941	0.74367	0.882562	0.785714	0.89851	0.67165	0.726842	0.614358	0.792967		0.617408	0.969027	0.810627	0.704185	0.954633	0.799251	0.739128	0.71471	0.708774	0.884578	0.79721	0.62719	0.993569
	0.786324	0.717284	0.731715	1.04945	0.731088	0.699936	0.867069	0.675581	0.648236		0.765641	1.235	0.638752	0.876664	0.873762	0.857089	0.605031	0.798592	0.635071	0.900047	0.718904	1.00949	0.631022	0.757168	0.776797	0.922923	0.827908	0.921401	0.652998	0.740924	0.61415	0.76541		0.616244	0.897039	0.885008	0.775621	0.84856	0.626353	0.894677	0.715152	0.636058	0.675417	0.883517	0.690308	0.898637
	0.769735	0.675967	0.723564	1.03079	0.673035	0.753302	0.80248	0.739927	0.582835		1.09403	0.924982	0.586707	0.926905	0.74228	0.926367	0.585652	0.730664	0.659296	1.04597	0.82236	1.03487	0.603308	0.823665	0.622575	1.02408	0.795192	0.803747	0.681496	0.762607	0.661231	0.747233		0.739963	1.01886	0.956877	0.739057	0.810109	0.759293	1.02799	0.714447	0.598317	0.588401	0.746848	0.740558	0.851195
	0.791326	0.685563	0.694217	1.13404	0.632741	0.828215	0.741797	0.776673	0.571069		1.12176	0.770946	0.57119	0.994831	0.620848	0.899244	0.644856	0.716715	0.677363	1.38219	0.862716	0.972399	0.584767	0.87707	0.563115	0.984018	0.752132	0.728131	0.800032	0.716183	0.714864	0.733279		0.83771	0.989734	1.00976	0.711857	0.835447	0.796427	0.78689	0.755606	0.597696	0.562549	0.750054	0.75761	0.825337
	0.841216	0.743581	0.67427	1.25114	0.643648	0.924109	0.777784	0.78161	0.609624		1.0667	0.671472	0.566527	0.888504	0.569968	0.78752	0.701385	0.762486	0.707513	1.31677	0.848322	0.838639	0.98143	0.863784	0.547906	1.06966	0.776317	0.644225	0.955601	0.620447	0.739345	0.737669		0.825691	0.962453	1.03651	0.703316	0.902907	0.786737	0.759058	0.662504	0.683636	0.585553	0.827992	0.506382	0.802036
	0.885012	0.8319	0.72701	1.27608	0.706953	1.06481	0.7285	0.742008	0.970917		1.0621	0.721557	0.56532	0.727642	0.533813	0.681925	0.687303	0.861707	1.08024	1.24931	0.842059	1.55039	0.841918	0.933993	0.550246	0.540191	0.86337	0.633636	1.03647	0.525537	0.732858	0.783716		0.712713	0.880351	0.876723	0.696563	0.95403	0.789516	0.772919	0.628979	0.688316	0.644047	0.915765	0.561306	0.765894
	0.877554	0.905872	0.864294	1.15104	0.803254	1.2354	0.771004	0.639703	1.08499		1.09446	0.884976	0.563582	0.635282	0.525535	0.678467	0.646895	0.756702	0.8575	1.18792	0.819717	1.19177	0.792186	0.894762	0.555027	0.670081	0.978984	0.672784	1.00923	0.51473	0.700279	0.861285		0.870246	0.993313	0.800117	0.678768	0.957784	0.689405	0.826876	0.633459	0.725618	0.689301	0.962392	0.592809	0.701218
	0.817722	0.909396	1.03126	0.937121	0.912003	1.39258	0.772204	0.610586	1.02164		1.1148	0.695318	0.573176	0.70757	0.584627	0.724773	0.669507	0.758484	0.71489	1.19107	0.790698	0.882568	0.762616	0.805759	0.562149	0.567825	1.05849	0.719456	0.702723	0.588711	0.888922	0.962338		0.763573	1.01097	0.808658	0.647303	0.938654	0.727455	0.771295	0.679591	0.742606	0.724328	0.94431	0.602993	0.653157
	0.735545	0.843119	0.778658	0.770598	1.01184	1.49174	0.737741	0.697879	0.896977		1.08559	0.628815	0.607427	0.928007	0.723175	0.725431	0.767034	0.868956	0.661227	1.25813	0.78184	0.742997	0.746852	0.706845	0.570945	0.534054	1.06967	0.957973	0.599587	0.674022	0.744354	1.05722		0.702377	1.01767	0.838227	0.624561	0.925677	0.745331	0.736485	0.730135	0.726381	0.775173	0.957508	0.619573	0.691395
	0.664434	0.752187	0.720666	1.02245	0.81073	1.47915	0.689663	0.74979	0.747964		1.0103	0.718548	0.685165	1.12873	0.887478	0.641394	0.863721	1.00522	0.663669	1.30553	0.763387	0.739152	0.72872	0.6242	0.586164	0.510645	0.67884	0.786915	0.623987	0.725866	0.624353	1.14925		0.646238	0.971323	0.866639	0.822984	0.907425	0.792847	0.750501	0.757665	0.676678	0.860804	1.03202	0.659957	0.824985
	0.641523	0.668513	0.716542	1.06611	0.678982	1.06865	0.666955	0.758587	0.63013		0.892919	1.00493	1.33269	1.14601	0.994358	0.552099	0.885067	1.05877	0.679891	1.27219	0.749134	0.825875	0.695164	0.762287	0.601335	0.504473	0.639472	0.765654	0.673953	0.867242	0.536668	1.03061		0.6414	1.03133	0.915947	0.773004	0.920984	0.698749	0.79273	0.747437	0.644884	0.95027	1.11574	0.706313	1.01405
	0.723018	0.60594	0.717852	1.1539	0.642357	1.12598	0.760625	0.714015	0.577905		0.758626	1.45195	1.38585	1.024	0.751307	0.485635	0.642813	1.01061	0.701094	1.17594	0.784795	0.92875	0.661505	0.732051	0.657409	0.55316	0.694547	0.800392	0.690483	0.742059	0.508883	1.03259		0.711249	1.05078	0.818958	0.69265	0.954539	0.824893	0.8032	0.821092	0.630786	0.719867	1.15493	0.748766	1.20611
	0.768469	0.556571	0.698214	1.18792	0.668437	1.15707	0.735892	0.607853	0.564743		0.631021	1.77623	1.34394	0.901047	0.645066	0.431174	0.577328	0.903442	0.754412	1.10152	0.828226	0.994417	0.642536	0.747794	0.716743	0.67358	0.781053	0.876944	0.653184	0.739977	0.542815	0.949476		0.754957	1.00459	0.833757	0.651301	1.2242	0.822177	0.795509	0.688794	0.607166	0.619002	1.11219	0.767483	0.920491
	0.779527	0.751164	0.67029	1.03436	0.69413	1.10635	0.720449	0.519847	1.11569		0.542597	1.89317	1.19482	0.86254	0.574219	1.41813	0.614903	0.804376	0.914197	1.06122	0.849387	1.07695	0.653967	0.820056	0.988511	0.831966	0.827851	0.983422	0.667779	0.812105	0.584913	0.870429		0.717438	1.00515	0.799026	0.658142	1.02605	0.810994	0.747883	0.634139	0.711095	0.596516	0.988426	0.496497	0.826263
	0.801898	0.72333	0.687433	0.86455	0.690066	0.997073	0.667295	0.640847	1.11436		0.522548	1.8508	0.946986	0.977631	0.534431	1.43279	0.684216	0.740736	0.766243	1.07003	0.899113	1.14118	0.655961	0.863327	0.703066	0.786502	0.797825	1.06705	0.771056	0.855821	0.586742	0.795044		0.619547	1.03066	0.843123	0.681303	0.969501	0.820514	0.7219	0.627533	0.731926	0.629758	0.872443	0.576639	0.775705
	0.840224	0.74921	0.767653	0.701375	0.666951	0.888817	0.603255	0.713575	1.02919		0.834153	1.90259	0.715232	0.859046	0.55443	1.09297	0.724117	0.733037	0.73062	1.143	0.872728	1.07199	0.642849	0.923646	0.587972	0.627691	0.740794	1.05659	0.917878	0.788106	0.580779	0.728274		0.809939	1.00521	0.878044	0.680324	0.942842	0.880085	0.739836	0.673724	0.73933	0.686577	0.795058	0.62826	0.740587
	0.873208	0.835986	0.878925	0.985836	0.655251	0.844061	0.558562	0.727586	0.886557		1.24209	1.95275	0.601238	0.887243	0.664773	0.817051	0.688323	0.784952	0.719021	1.11325	0.856846	0.872112	0.620231	0.965438	0.560482	0.572581	0.738287	0.934728	0.993126	0.630209	0.6049	0.703258		0.713318	0.928714	0.884449	0.722001	0.960678	0.835802	0.797528	0.743902	0.70329	0.738278	0.770224	0.661153	0.708708
	0.87696	0.969017	0.962024	1.05577	0.678079	0.888344	0.577642	0.684531	0.713511		1.25638	1.77142	0.576172	0.936268	0.839987	0.76846	0.636012	0.736808	0.71983	1.12329	0.838303	1.0408	0.900119	0.925497	0.565047	0.54522	0.800413	0.751278	0.977324	0.487366	0.659258	0.731006		0.686526	0.956718	0.867857	0.670479	1.03439	0.813968	0.906871	0.798843	0.642835	0.782978	0.704381	0.681607	0.671455
	0.838306	1.08837	0.798703	1.09932	0.739967	1.00959	0.756774	0.584735	0.630359		1.13436	1.38519	0.559155	0.980853	1.00292	0.828851	0.641664	0.756442	0.744117	1.16829	0.824473	0.826164	0.824695	0.828851	0.572894	0.523015	0.895045	0.66652	0.690163	0.484916	0.706582	0.800086		0.701467		0.858783	0.690872	1.11676	0.785754	0.763012	0.858699	0.62297	0.838348	0.753033	0.707137	0.644919
	0.77462	1.11142	0.724263	1.03584	0.830603	1.17488	0.722901	0.557055	0.578254		1.06092	1.0113	0.534223	0.855538	1.05135	0.864529	0.723648	0.87941	0.810727	1.13614	0.819246	0.730444	0.784196	0.713651	0.580492	0.506229	0.977909	0.654917	0.59085	0.600128	0.726557	0.893598		0.724659		0.899954	0.769746	1.17246	0.764978	0.7481	0.694632	0.642065	1.00855	0.869177	0.7375	0.677748
	0.720991	1.02034	0.70507	0.938312	0.918799	1.34534	0.757098	0.650344	0.550406		1.05746	0.773702	0.526437	0.684273	0.782761	0.812548	0.828976	1.01464	0.858235	1.03045	0.804634	0.720873	0.759546	0.597054	0.58772	0.520975	1.00205	0.696783	0.611532	0.743634	0.728487	0.992406		0.734851		0.766856	0.840579	1.1833	0.792914	0.72997	0.653201	0.6417	0.79248	0.985276	0.758706	0.776739
	0.715936	0.869719	0.708873	0.817227	0.912313	1.48547	0.70966	0.676628	1.17504		1.10545	0.668399	0.534705	0.620371	0.669355	0.703957	0.739631	1.04907	0.81965	0.981696	0.791078	0.794224	0.739971	0.727233	0.595032	0.59426	0.755306	0.736985	0.661697	0.840341	0.546274	1.36046		0.70534		0.813055	0.631493	1.1496	0.83376	0.722651	0.653764	0.735441	0.687441	1.04767	0.424604	0.916597
	0.796071	0.721925	0.715609	0.632452	0.744865	1.59121	0.598073	0.646384	1.1513		1.15518	0.686183	0.552292	0.722887	0.59599	0.629146	0.549376	0.964851	0.800334	0.973332	0.819666	0.911499	0.711585	0.78322	0.603267	0.71135	0.658673	0.972144	0.667776	0.962687	0.444984	1.31126		0.645691		0.847393	0.654868	1.05834	0.814961	0.744839	0.689464	0.759091	0.661333	1.03393	0.567526	1.08389
	0.822661	0.617428	0.714023	0.937877	0.616158	1.62646	0.486198	0.429695	1.04667		1.14631	0.978006	0.578508	0.881388	0.570506	0.62615	0.559698	0.841139	0.777123	0.97322	0.864743	1.037	0.673572	0.818877	0.617737	0.831211	0.679652	0.829576	0.638949	0.760569	0.446307	1.19157		0.769572		0.72448	0.754708	1.00199	0.801919	0.799724	0.75576	0.744513	0.684079	1.01632	0.645877	0.941843
	0.844749	0.587505	0.717045	0.972289	0.590869	1.11565	0.429143	0.563154	0.849751		1.0512	0.751135	0.63185	1.01578	0.63034	0.66719	0.633784	0.757298	0.794243	1.05771	0.881402	1.17214	0.655263	0.860603	0.64434	0.884516	0.739523	0.851177	0.653632	0.693429	0.506332	1.01549		0.649114		0.702132	0.918806	1.09607	0.767024	0.901864	0.814312	0.674012	0.730663	1.03315	0.673428	0.821532
	0.865484	0.631492	0.742279	0.9841	0.615321	1.13432	0.487838	0.610015	0.720415		0.879315	0.586475	1.07769	0.962904	0.777092	0.659118	0.720953	0.673996	0.868738	1.061	0.942553	1.12172	0.672039	0.916035	0.683519	0.742535	0.779848	0.93343	0.742531	0.757182	0.53943	0.82369		0.666109		0.756835	0.763265	1.14269	0.735792	1.03091	0.714459	0.610159	0.785655	1.07839	0.675175	0.770652
	0.876304	0.793877	0.78989	0.921128	0.657808	1.21299	0.718525	0.600975	0.639827		0.69752	0.564292	1.28808	0.803252	0.94356	0.556245	0.746438	0.735811	0.862392	1.03956	0.898182	1.13379	0.69962	0.948584	0.727311	0.654151	0.763695	1.04248	0.865147	0.888057	0.48444	0.699955		0.75909		0.809346	0.698974	1.10824	0.752527	0.6977	0.691554	0.615243	0.844481	1.11804	0.67457	0.708955
	0.86105	0.76964	0.840027	0.874169	0.687501	1.3019	0.76219	0.539904	0.584827		0.583693	0.730916	1.23078	0.752135	1.03398	0.494683	0.684343	0.799714	1.20217	1.04772	0.852835	0.868825	0.718471	0.91637	0.953549	0.595272	0.721078	1.14024	0.908833	0.96189	0.52164	0.686799		0.821585		0.869515	0.672099	1.10647	0.864655	0.700423	0.706383	0.661397	0.889789	1.03855	0.684903	0.691585
	0.824602	0.80816	0.854533	0.747127	0.703182	1.33014	0.725727	1.19767	1.22831		0.579263	1.12934	1.08189	0.779235	0.827098	0.46326	0.616304	0.700013	1.19326	0.984834	0.834712	0.794201	0.89406	0.831363	0.672999	0.559944	0.710492	1.17424	0.968198	0.873631	0.569887	0.753268		0.794191		0.917193	0.669247	1.19427	0.800439	0.640653	0.737014	0.747974	0.895033	1.01769	0.61795	0.660982
	0.805207	0.908589	0.760538	0.902849	0.72167	1.26613	0.574696	1.14375	1.21117		0.647624	1.66282	0.865282	1.01935	0.718817	1.37454	0.618435	0.750287	1.15636	0.899349	0.845058	0.728054	0.84706	0.709945	0.576406	0.544171	0.75389	1.10542	0.70974	0.66588	0.636293	0.857193		0.718533		0.696862	0.705775	1.23984	0.784004	0.730486	0.773365	0.758811	0.777027	0.896862	0.636222	0.644071
	0.869342	1.06258	0.71581	0.902883	0.75624	1.14559	0.39115	0.975061	1.09847		0.892687	1.96843	0.667255	0.874216	0.646106	1.26105	0.689977	0.893588	1.1234	0.880907	0.853084	0.699187	0.800933	0.708495	0.569986	0.535521	0.831017	0.941601	0.591626	0.506234	0.679801	0.965302		0.640985		0.667238	0.807108	1.42139	0.785315	0.745938	0.772765	0.787517	0.738028	0.794182	0.617118	0.67007
	0.869719	1.2202	0.72475	0.860093	0.813893	1.06445	0.296789	0.798661	0.904849		1.40147	1.92392	0.579167	0.884732	0.648243	0.990205	0.808246	1.03315	1.10779	0.91281	0.850252	0.758353	0.770827	0.747088	0.593111	0.544826	0.90887	0.773661	0.5871	0.507481	0.699819	1.60792		0.762262		0.714946	0.902391	1.45758	0.75534	0.786809	0.746834	0.753315	0.736622	0.855125	0.587625	0.750397
	0.870952	1.28	0.767852	0.857937	0.88659	1.08427	0.669139	0.66462	0.790159		1.41081	1.81234	0.565474	0.940443	0.749313	0.789708	0.734726	1.04272	1.02783	0.96682	0.843423	0.901534	0.737838	0.805371	0.617733	0.587288	0.861291	0.682883	0.617912	0.632495	0.699838	1.45682		0.639702		0.778037	0.762288	1.36557	0.723594	0.863778	0.758069	0.657104	0.761807	0.699001	0.556709	0.867534
	0.874299	1.18837	0.805592	0.789352	0.926933	1.22044	0.729953	0.583237	0.670337		1.25024	1.78236	0.550224	0.925471	0.901166	0.749765	0.541305	0.904449	0.896397	0.992355	0.846156	1.0958	0.697189	0.852456	0.632223	0.667005	0.703068	0.681762	0.629932	0.776139	0.437806	1.16563		0.675085		0.888873	0.70988	1.18294	0.72178	0.97168	0.803374	0.588611	0.816033	0.686721	0.511365	1.02981
	0.880312	0.98702	0.799155	0.679836	0.973616	1.41006	0.73007	0.516643	1.29813		1.13963	1.70389	0.521417	0.804416	0.996078	0.785427	0.555336	0.751682	0.802937	1.06801	0.879661	1.2768	0.672489	0.895674	0.638734	0.769593	0.664966	0.725772	0.622252	0.902982	0.515299	0.845233		0.787656		0.881133	0.691395	1.38365	0.722353	1.0631	0.86039	0.609991	0.883385	0.756365	0.491157	0.854622
	0.888815	0.773765	0.766356	0.89754	0.831789	1.57724	0.589908	1.14507	1.3087		1.10472	1.46364	0.505333	0.624711	0.983826	0.79021	0.641493	0.686069	1.23079	0.998172	0.901025	1.31158	0.681279	0.909953	0.63756	0.867597	0.679919	0.76392	0.646035	0.837169	0.591845	0.67592		0.870337		0.70033	0.682288	1.32791	0.913578	0.63284	0.811438	0.729224	0.993018	0.879895	0.696676	0.806251
	0.901894	0.638106	0.751168	0.856659	0.701254	1.67962	0.590271	1.11298	1.19157		1.15077	1.14105	0.516828	0.565603	0.859937	0.719653	0.725807	0.692466	1.21359	0.960299	0.996331	1.11932	0.734978	0.880191	0.626696	0.805966	0.704161	0.978861	0.716358	0.676098	0.646346	0.686935		0.856452		0.660396	0.667117	1.26439	0.8109	0.658984	0.834486	0.773886	0.858011	1.00993	0.6723	0.756255
	0.880434	0.608617	0.76568	0.820618	0.608147	1.67258	0.657513	0.980856	1.02738		1.21408	0.86459	0.541225	0.677227	0.955734	0.621	0.736539	0.698987	1.18661	0.883972	0.896633	0.819598	0.924986	0.811443	0.605673	0.731284	0.707833	0.850292	0.797065	0.641841	0.666599	0.795554		0.772822		0.694584	0.663143	1.32524	0.763562	0.704342	0.880497	0.812432	0.77438	1.09862	0.705933	0.714355
	0.870907	0.67679	0.785838	0.776973	0.576566	1.66181	0.701016	0.814735	0.8556		1.22547	0.678493	0.572503	0.748739	0.69221	0.561765	0.665951	0.81854	1.1385	0.805394	0.846497	0.806669	0.882325	0.689803	0.625795	0.670567	0.693403	0.901832	1.00137	0.750314	0.520038	0.937069		0.674191		0.772319	0.700485	1.48224	0.754682	0.730232	1.11253	0.765847	0.772313	1.0995	0.779183	0.682722
	0.899338	0.820891	0.941045	0.709012	0.606833	1.21524	0.494508	0.677881	1.35324		1.1458	0.552942	0.615026	0.840896	0.89218	0.597713	0.606236	0.66806	1.04835	0.799367	0.849602	0.72754	0.839305	0.758492	0.654426	0.615887	0.69469	1.02359	0.758491	0.939006	0.587723	1.26929		0.775053		0.927643	0.795673	1.61649	0.757732	0.744529	1.00291	0.656597	0.773231	1.05789	0.733568	0.660299
	0.665084	0.847673	0.819114	0.790069	0.676687	1.22753	0.571146	0.590492	1.41524		0.985006	0.887472	1.1969	0.774865	0.726421	0.645724	0.615409	0.746623	0.980531	0.852007	0.864167	0.680439	0.797019	0.84179	0.705378	0.58528	0.728214	1.15293	0.61119	1.04741	0.843492	0.855551		0.69174		0.869942	0.77805	1.49473	0.710867	0.765925	0.932191	0.582116	0.785879	1.0169	0.655193	0.68443
	0.637899	0.943759	0.760173	0.782229	0.750483	1.23969	0.648376	0.518133	1.29133		0.810034	0.642796	1.07476	0.722621	0.660496	0.656986	0.693622	0.906897	0.911973	0.919123	0.88207	0.733347	0.759744	0.881299	0.983443	0.583247	0.786452	1.2234	0.575353	0.945801	0.817975	0.665745		0.722202		0.708626	0.709162	1.43668	0.734568	0.810009	1.02925	0.589353	0.563793	1.0358	0.624604	0.766461
	0.698366	1.09099	0.770121	0.721251	0.801744	1.3154	0.628312	1.07924	1.11861		0.692141	0.520024	1.01372	0.68926	0.663355	0.606842	0.833858	1.04393	0.836845	0.93536	0.888151	0.91391	0.933125	0.875673	0.643623	0.594048	0.853006	1.18748	0.593447	0.713298	0.763571	0.702074		0.800395		0.670026	0.681434	0.912405	0.720176	0.877745	0.938745	0.701583	0.565152	1.07671	0.65607	0.882307
	0.673911	1.25651	0.843157	0.857255	0.839939	1.41595	0.628306	1.06984	1.48208		0.654864	0.546667	0.918639	1.06059	0.706357	0.526354	0.842892	1.0213	0.763797	1.05279	0.865005	1.12794	0.902991	0.835126	0.576162	0.604247	0.783627	1.05262	0.613988	0.555342	0.749401	0.85648		0.865745		0.713383	0.683386	0.974761	0.695762	0.946995	0.879925	0.754404	0.577574	1.09129	0.721506	0.92564
	0.726685	1.34033	0.903153	0.778751	0.880033	1.49635	0.653151	0.967574	1.3578		0.686841	0.765305	0.797909	0.887168	0.964437	0.433174	0.629368	0.843385	0.754271	0.955905	0.863939	1.34897	0.87086	0.761575	0.58398	0.623317	0.661124	0.879209	0.626632	0.555392	0.741573	0.720156		0.86421		0.831739	0.69129	0.953679	0.859816	0.604649	0.848581	0.803221	0.61026	1.01359	0.76063	0.87418
	0.733998	1.26985	0.880248	0.695286	0.929695	1.48913	0.694448	0.816357	1.13615		0.738581	1.20973	0.645609	0.856868	0.770861	1.36028	0.585584	0.676667	1.21983	0.897213	0.885032	1.29182	0.73813	0.81796	0.633613	0.671398	0.630235	0.739456	0.650077	0.645264	0.741557	0.730259		0.797631		1.01977	0.678563	0.941689	0.769106	0.626422	0.983674	0.771596	0.590761	0.873768	0.691584	0.817655
	0.801743	1.06041	0.798854	1.11349	0.971721	1.40311	0.635438	0.676011	1.31321		0.816254	1.73995	0.571902	0.87317	0.643481	1.27027	0.639339	0.590062	1.2151	0.82675	0.918675	1.01268	0.759857	0.877466	0.682429	0.748312	0.634009	0.682561	0.682938	0.778139	0.884373	0.651556		0.69228		0.83689	0.649656	0.944606	0.733226	0.67991	0.925527	0.679074	0.587815	0.766903	0.621979	0.770301
	0.6244	0.824375	0.735044	1.17423	0.932089	1.30587	0.622023	0.585473	1.08119		1.37858	1.96314	0.55763	0.853622	0.596569	1.09726	0.700221	0.674626	1.2232	0.75496	1.04792	0.730666	0.785967	0.860829	0.708007	0.84811	0.649908	0.700455	1.07721	0.908742	0.75242	0.579859		0.771373		0.687565	0.658257	0.936733	0.726786	0.718962	0.868874	0.596071	0.600538	0.750316	0.587828	0.727938
	0.615048	0.67042	0.724275	1.21237	0.787412	1.30222	0.620056	0.515037	1.07642		1.45346	1.84259	0.547831	0.78471	0.614692	0.884104	0.708302	0.779174	1.19397	0.743462	0.884049	0.67837	0.789015	0.793418	0.688072	0.833767	0.660363	0.742093	0.857059	0.817089	0.702981	0.658476		0.742796		0.693645	0.717861	0.936376	0.74441	0.73147	0.826699	0.664879	0.606314	0.645534	0.61782	0.699514
	0.659491	0.639349	0.750124	1.02475	0.669612	1.41745	0.645612	0.399748	0.812475		1.33498	1.67349	0.526205	0.655393	0.665852	0.751669	0.65437	0.65414	1.16091	0.81176	0.85686	0.65189	0.812579	1.71182	0.68219	0.76038	0.673813	0.76599	0.647382	0.611348	0.685837	0.738072		0.761227		0.792497	0.865602	0.888874	0.699326	0.732983	0.785123	0.710842	0.636361	0.668694	0.695806	0.725911
	0.704132	0.715228	1.0272	1.02628	0.601455	1.59374	0.683358	1.00983	0.982072		1.25703	1.5456	0.509333	0.598135	0.943903	0.727167	0.618654	0.748073	1.05922	0.893304	0.890007	0.717716	0.771971	1.6472	0.643616	0.723884	0.709162	0.996866	0.589142	0.59241	0.691247	1.29306		0.786312		0.963049	0.740794	1.33618	0.768163	0.720599	0.864633	0.764121	0.600555	0.750594	0.8098	0.808397
	0.750976	0.878833	0.879363	1.0919	0.589014	1.72838	0.710526	1.02012	1.05963		1.22806	1.38658	0.516928	0.617375	0.950651	0.753866	0.645133	0.896483	0.949815	0.898831	0.901547	0.934242	0.728818	1.58147	0.610786	0.681425	0.758786	0.848466	0.605657	0.734308	0.741439	1.17546		0.802792		1.18163	0.667795	1.12959	0.744575	0.802096	0.832356	0.767056	0.589398	0.865597	0.777196	0.921626
	0.754632	0.944835	0.809794	1.13747	0.643255	1.77387	0.709805	0.942637	0.980302		1.23946	1.1777	0.542414	0.623507	1.22782	0.740891	0.743303	1.0135	0.873008	1.1781	0.906174	1.20012	0.740131	1.5261	0.602447	0.63355	0.701686	0.893718	0.640993	0.960985	0.888292	1.04176		0.794598		1.38788	0.649171	1.01503	0.702398	0.855766	0.811311	0.72384	0.579446	0.984221	0.719939	0.943599
	0.767101	1.07598	0.823325	1.14774	0.753071	1.71004	0.601242	0.806152	0.64984		1.25699	0.961167	0.580959	0.668586	1.04629	0.660627	0.918479	0.93106	0.830276	0.98282	0.913384	1.32556	0.736183	1.45299	0.631644	0.618283	0.616363	1.02685	0.663968	1.09376	1.12084	0.803768		0.740704		0.623907	0.679341	0.961147	0.805806	0.606679	0.765884	0.622533	0.599218	1.08073	0.64613	0.87774
	0.826631	1.22112	0.898628	1.05892	0.868191	1.31967	0.593403	0.671145	0.804213		1.23246	0.776753	0.632509	0.702725	0.827584	0.561104	0.783561	0.788708	0.780398	0.912495	0.88046	1.16142	0.707806	1.40807	0.701158	0.642647	0.599628	1.16322	0.670799	0.966921	1.27175	0.695048		0.844415		0.714526	0.720539	0.932472	0.734224	0.65403	0.730891	0.660192	0.615908	1.10781	0.585584	0.833029
	0.96555	1.301	0.952657	0.961393	0.951788	1.34041	0.615211	0.580877	0.947592		1.1478	0.6419	1.16622	0.690813	0.662543	0.538179	0.653873	0.588045	0.730537	0.865909	0.884959	0.860037	0.726636	1.34766	1.07508	0.671364	0.611133	1.21268	0.626797	0.728913	1.20769	0.637385		0.739409		0.898188	0.726665	0.889682	0.702673	0.695719	0.785557	0.716883	0.619543	1.06041	0.565229	0.790554
	0.704619	1.25075	0.909442	1.00584	1.00934	1.3675	0.664282	0.514064	1.02635		1.02381	0.794354	1.07544	0.70632	0.566034	0.609499	0.644868	0.619443	0.73617	0.800886	0.906351	0.621792	0.799738	1.24837	0.71552	0.680548	0.625881	1.12427	0.985735	0.599641	1.03638	0.597391		0.731808		1.14107	0.693125	0.866252	0.71339	0.711503	0.773607	0.758767	0.76851	0.995261	0.595191	0.760826
	0.674158	1.07364	0.797555	1.06914	1.05256	1.41883	0.715528	0.399657	0.987226		0.886195	0.603121	0.890435	1.04836	0.539708	0.708894	0.66074	0.707882	1.20015	0.74436	0.906749	0.609879	0.925493	1.29884	0.584563	0.682714	0.647685	0.950986	0.71845	0.582731	0.820083	0.622654		0.743382		1.38501	0.668667	0.886458	0.748376	0.699346	0.771916	0.579703	0.687535	1.00856	0.657616	0.785912
	0.662687	0.862093	0.712444	1.10798	1.08482	1.50365	0.738588	0.93341	0.820331		0.766756	0.532826	0.86719	0.88039	0.562286	0.724044	0.664341	0.867507	1.21586	0.735523	0.90446	0.717467	0.820885	1.27027	0.592626	0.702185	0.683079	0.786114	0.623267	0.641258	0.699736	0.777819		0.735188		1.52549	0.698992	0.891546	0.801117	0.707455	0.755415	0.6157	0.623173	1.06853	0.761298	0.852859
	0.688585	0.717093	0.689826	1.02453	1.04059	1.59152	0.689007	0.959917	0.774077		0.690904	0.590377	0.745857	0.832555	0.618235	0.653148	0.649601	0.73752	1.22437	0.810555	0.951735	0.943769	0.750529	1.23871	0.658637	0.752309	0.737941	0.687706	0.652249	0.733921	0.67193	1.11449		0.713674		0.727154	0.803078	0.886757	0.818512	0.75114	0.776163	0.687576	0.578316	1.07798	0.766407	0.869311
	0.735417	0.686136	0.724608	1.05537	0.918735	1.63203	0.614011	0.905817	0.63532		0.680513	0.811279	0.629931	0.831332	0.83876	0.530856	0.648147	0.860227	1.16194	0.883876	0.956357	1.16885	0.757805	1.17277	0.73538	0.840213	0.796305	0.66541	0.707741	1.10639	0.659434	1.40608		0.68094		1.00244	0.901666	1.25436	0.770059	0.808486	0.763571	0.751085	0.564446	0.983969	0.690943	0.862698
	0.760629	0.77142	0.920798	0.927504	0.760454	1.59639	0.591702	0.790289	0.718603		0.715664	1.21056	0.572508	0.827601	0.764675	1.34691	0.701139	0.938107	1.06468	0.848194	0.944594	1.18278	0.746912	1.08299	0.781114	0.905338	0.654118	0.692998	0.744986	0.72525	0.642089	1.30653		0.644632		1.30898	0.723153	1.13416	0.694818	0.853694	0.765093	0.742003	0.584824	0.825836	0.61435	0.84535
	0.768933	0.887875	0.846058	0.940632	0.644481	1.53341	0.581755	0.646236	0.857274		0.6686	1.62547	0.569328	0.784731	0.770422	1.1584	0.832506	0.892785	0.953796	1.06857	0.943755	0.963944	0.705732	1.06826	0.772563	0.774221	0.610859	0.735305	0.716641	0.565957	0.628123	1.08263		0.767744		1.57692	0.633765	1.03265	0.656502	0.604076	0.742375	0.815279	0.604084	0.713404	0.568455	0.848297
	0.779942	0.936336	0.848021	1.02759	0.603077	1.51833	0.608937	0.585774	0.964063		1.22982	1.75346	0.580009	0.710858	0.87733	0.95353	1.05706	0.747682	0.858003	0.920034	0.92623	0.700184	0.658856	1.12176	0.715505	0.741652	0.606321	0.756544	0.821463	0.559283	0.747513	0.929626		0.692287		1.6608	0.615878	0.954282	0.783473	0.628187	0.785703	0.861904	0.614376	0.591303	0.568181	0.864029
	0.838204	1.04663	0.901317	1.09668	0.621702	1.57602	0.673829	0.517743	0.999985		1.40981	1.62317	0.57661	0.632387	1.00648	0.78096	0.913349	0.652718	0.802874	0.887735	0.924838	0.714096	0.677252	1.17569	0.640569	0.727349	0.610411	1.0232	0.687273	0.718428	0.931841	0.827892		0.678274		0.699089	0.677644	0.906868	0.710622	0.666854	0.787392	0.955731	0.621591	0.630945	0.594232	0.951316
	0.776669	1.1618	0.929497	1.122	0.71272	1.68565	0.734986	0.404359	0.955296		1.35169	1.43902	0.559683	0.596896	1.01053	0.70063	0.761931	0.679747	0.765084	0.85272	0.949146	0.924117	0.748352	1.15733	0.588945	0.691907	0.626437	0.834557	0.715338	0.963555	1.12025	0.895653		0.667772		1.08346	0.773391	0.865279	0.696862	0.690884		0.703514	0.823979	0.723983	0.636193	0.945556
	0.749871	1.21962	0.870607	1.01418	0.855999	1.75238	0.754493	0.85852	0.836773		1.31139	1.27001	0.529791	0.561683	0.866977	0.71728	0.676022	0.804906	0.671913	0.809073	0.995549	1.04808	0.83905	1.17328	0.57717	0.653124	0.662109	0.841389	0.798182	1.06205	1.14298	0.751006		0.640579		1.4356	0.815318	0.851325	0.721997	0.681169		0.749733	0.732454	0.817769	0.707369	0.90892
	0.722476	1.17681	0.759834	0.938368	1.0142	1.36116	0.703682	0.887489	1.04177		1.30549	1.10975	0.561832	0.637794	0.700385	0.763783	0.656979	1.00673	0.684191	0.777844	0.984052	0.968081	0.835535	1.09323	0.613067	0.658396	0.721144	0.94773	0.856252	0.908867	1.03695	0.714352		0.601783		1.72001	0.779643	0.878926	0.77913	0.681253		0.75557	0.668006	0.920476	0.838824	1.01476
	0.717234	1.04696	0.681145	0.941372	1.13286	1.41168	0.633089	0.855119	0.74585		1.28405	0.951897	0.595417	0.685992	0.582472	0.746737	0.649582	0.717141	0.717775	0.761952	0.995496	0.767028	0.826807	1.08086	0.707524	0.707826	0.741609	1.07247	0.781249	0.714442	0.919477	0.667611		0.556547		1.78088	0.732597	0.848401	0.841735	0.717512		0.715878	0.612941	1.00814	0.755413	1.00337
	0.727046	0.889184	0.66552	0.847325	1.20482	1.45749	0.596423	0.771633	0.708777		1.22875	0.820685	0.651063	0.7471	0.515621	0.646638	0.658512	0.809749	1.21795	0.804821	0.973201	0.562143	0.806383	0.964501	0.789945	0.748562	0.671996	1.11544	0.874829	0.607663	0.788634	0.606526		0.717782		1.13821	0.728477	0.908905	0.846003	0.77805		0.704173	0.575709	1.01199	0.744264	0.662938
	0.754342	0.782359	0.875384	0.934149	1.24372	1.50331	0.581178	0.645008	0.810021		1.1471	0.728839	1.17486	0.990176	0.497318	0.515264	0.697348	0.847663	1.24167	0.834288	0.946733	0.845373	0.815054	0.971626	0.604258	0.75339	0.650761	1.0174	0.676798	0.5901	0.859313	0.626191		0.637987		1.52642	0.803945	0.921814	0.776174	0.838349		0.743231	0.561929	1.0218	0.667216	0.678657
	0.779297	0.772579	0.86343	1.06571	1.21306	1.55786	0.604765	0.604095	0.930657		1.06421	0.498352	1.0227	0.868683	0.517328	0.576694	0.788058	0.803502	1.21715	0.768666	0.940518	0.865828	0.80965	1.00178	0.587144	0.74186	0.63954	0.847869	0.751922	0.604128	0.656321	0.819155		0.594997		1.7966	0.947202	1.21264	0.67914	0.595924		0.801375	0.590253	0.975339	0.614046	0.799876
	0.78665	1.03386	0.837491	1.15427	0.926283	1.60748	0.669743	0.531388	0.994809		0.990418	0.646635	0.91189	0.842693	0.569083	0.704476	0.957146	0.724808	1.09808	1.02339	0.883635	0.763023	0.770895	1.07319	0.653471	0.745004	0.636747	0.707917	0.875404	0.633171	0.593946	1.16006		0.556237		1.84689	0.725381	1.11757	0.572365	0.606918		0.889922	0.60556	1.0043	0.58306	0.696471
	0.797852	1.11305	0.852503	1.16156	0.747576	1.64764	0.730896	0.411919	0.978934		0.908018	0.633261	0.808371	0.861216	0.783913	0.795561	0.871555	0.712567	0.950036	0.914614	0.974105	0.606691	0.703995	1.06248	0.748069	0.774783	0.627047	0.636525	0.652781	1.01208	0.605174	1.36737		0.520103		1.20751	0.597554	1.06625	0.779175	0.652308		1.02665	0.602263	1.06291	0.590607	0.663543
	0.854805	1.14001	0.850616	1.02011	0.634385	1.68495	0.745484	0.769925	0.908451		0.804924	0.685467	0.704951	0.88803	0.708724	0.800668	0.759027	0.804294	0.834411	0.88538	1.02944	0.686813	0.651821	1.12703	0.813989	0.823077	0.772116	0.629483	0.671419	0.692092	0.617776	1.2062		0.631716		1.58747	0.57947	1.02857	0.700813	0.685224		0.729513	0.605549	1.04899	0.612032	0.672388
	0.804991	1.09873	0.792608	0.964622	0.618604	1.47075	0.722658	0.8025	0.816943		0.698385	0.845426	0.616881	0.884396	0.640395	0.707872	0.695982	0.977689	0.743883	0.855064	0.791588	0.589324	0.654233	1.17085	0.810105	0.755186	0.74791	0.661242	0.717823	0.536164	0.612059	0.963881		0.652614		1.7986	0.66366	0.965664	0.67339	0.683866		0.772151	0.778659	0.943633	0.630988	0.714024
	0.782492	1.00672	0.708504	0.838138	0.682503	1.51945	0.729897	0.79889	0.947389		0.656158	1.11784	0.585002	0.814722	0.63952	0.517595	0.675307	1.19033	0.737796	0.830541	0.855978	1.07202	0.696355	1.09063	0.705847	0.759442	0.727746	0.699848	0.812467	0.561922	0.632345	0.821954		0.69624		1.81653	0.800157	0.91617	0.756642	0.674648		0.758826	0.696661	0.782659	0.669764	0.885593
	0.765879	0.914603	0.654755	0.793489	0.808277	1.30556	0.615216	0.753603	0.782843		0.695349	1.3751	0.61145	0.710868	0.709076	1.27193	0.70356	0.782494	0.703924	0.829698	0.934105	1.09493	0.762748	1.06601	0.621025	0.733168	0.699958	1.0509	0.961909	0.715118	0.744454	0.803402		0.691282		1.30986	0.873132	0.884856	0.831685	0.684884		0.716612	0.653372	0.541573	0.762893	0.703884
	0.765829	0.878643	0.655534	0.920786	0.978686	1.24768	0.589065	0.691959	0.801628		0.498366	1.44531	0.660676	0.632037	0.778775	1.04946	0.757101	0.774254	0.652142	0.802967	0.983351	1.00523	0.759874	0.982925	0.558822	0.727064	0.866203	0.830119	0.703875	0.918659	0.925376	0.813439		0.679498		1.62229	0.809209	0.871442	0.876495	0.735441		0.725508	0.618804	0.576836	0.7069	0.690348
	0.781874	1.09885	0.96081	1.08231	1.15082	1.12447	0.600058	0.625124	0.906085		1.06026	1.3476	0.688848	0.62137	0.766071	0.832063	0.865686	0.725814	0.640187	0.79208	0.98625	1.03537	0.765469	0.952109	0.553805	0.687735	0.873443	0.774522	0.677026	0.951917	1.04653	0.743312		0.66648		1.73809	0.787371	0.884389	0.850178	0.799689		0.768531	0.600595	0.668424	0.715712	0.695228
	0.802474	1.09069	0.806484	1.18597	1.27845	0.961755	0.650144	0.54948	1.00269		1.34149	1.19727	0.632005	0.663823	0.689891	0.687037	0.792503	0.71063	0.705277	0.757825	1.03603	0.997197	0.7875	0.960662	0.606547	0.698442	0.861937	0.82644	0.685029	0.808731	1.01122	0.737999		0.754012		1.70759	0.738448	0.902927	0.761053	0.597808		0.827237	0.60952	0.749015	0.6869	0.688679
	0.81327	1.0395	0.769752	1.13293	1.34235	0.848509	0.699068	0.427738	1.02213		1.32038	1.03591	0.619452	0.74684	0.602143	0.657934	0.779361	0.801384	1.25981	1.0197	0.712391	0.902477	0.800607	0.985433	0.722729	0.750267	0.820314	0.921888	0.698808	0.664452	0.906347	0.701846		0.766737		1.6188	0.811787	0.912079	0.662216	0.647855		0.916114	0.625371	0.827435	0.647347	0.688038
	0.833384	0.975939	0.7869	1.09004	1.31784	0.80264	0.708659	0.68086	0.961471		1.25396	0.878848	0.590829	1.18824	0.531741	0.736817	0.789294	0.977315	1.27018	0.942204	0.73284	1.00757	0.854528	1.02493	0.905715	0.793605	0.985979	0.967417	0.754422	0.594176	0.8247	0.634856		0.767244		1.64799	1.0032	0.952925	0.554811	0.693305		1.05409	0.602277	0.903723	0.622891	0.72872
	0.862411	0.950237	0.757737	0.804199	0.783542	1.28057	0.693848	0.710497	0.871818		1.22771	0.771038	0.603919	0.926678	0.489066	0.819624	0.797601	1.13196	1.17451	0.914284	0.815837	0.953649	0.844066	1.01452	0.631891	0.806565	1.01527	0.901129	0.887659	0.555367	0.754596	0.654806		0.731122		1.56597	0.735002	1.24504	0.709858	0.698277		0.665003	0.573568	0.955052	0.619564	0.71292
	0.844365	1.02028	0.715886	0.7766	0.930975	1.18579	0.726008	0.740581	0.787971		1.17806	0.71013	0.653304	0.85431	0.470242	0.789074	0.583095	0.793335	0.990122	0.880738	0.889814	1.00974	0.795787	1.14142	0.569233	0.795913	0.846721	0.771056	1.0747	0.516576	0.746379	0.836373		0.68947		1.58322	0.580001	1.09441	0.727108	0.664053		0.741872	0.576719	0.964751	0.621375	0.617549
	0.826793	1.10374	0.669674	0.880893	1.10067	1.09592	0.628789	0.743181	0.910238		1.08915	0.502569	1.00398	0.879102	0.48489	0.664711	0.592436	0.730362	0.829683	0.865327	0.924444	0.921876	0.730113	1.15188	0.61663	0.793633	0.917661	0.652945	0.717916	0.916548	0.595397	1.05693		0.780257		1.55212	0.55538	1.01462	0.794615	0.649364		0.7813	0.857395	0.949446	0.625343	0.716615
	0.810447	1.02631	0.654467	1.02313	1.25823	0.993697	0.598505	0.715056	0.849205		0.99561	0.778579	0.879586	0.943069	0.525584	0.588121	0.647023	0.675117	0.685714	0.880444	0.953748	0.839935	0.690764	1.19738	0.70575	0.810385	0.887953	0.590725	0.695616	0.627264	0.555388	1.21755		0.787791		1.45074	0.63726	0.987306	0.864204	0.691506		0.766756	0.726999	0.997363	0.651376	0.740218
	0.807775	0.635392	0.675777	1.15055	1.34809	0.903728	0.598565	0.665794	0.896518		0.946741	0.814357	0.776158	0.993653	0.758172	0.653425	0.641247	0.719144	0.688117	0.845663	1.02731	0.845705	0.671496	1.11243	0.785351	0.781893	0.800556	0.579166	0.704982	0.523197	0.574597	1.04803		0.829135		1.49733	0.767371	1.00453	0.885543	0.760201		0.753736	0.671141	1.04684	0.713068	0.759903
	0.82923	0.619676	0.902816	1.15099	1.07966	0.870105	0.605947	0.589796	0.982218		0.935955	0.823197	0.67296	0.989974	0.692951	0.771254	0.770869	0.902601	0.6731	0.786769	0.780005	1.03042	0.658205	1.02448	0.790158	0.769653	0.748186	0.599879	0.696268	0.562146	0.594807	0.846328		0.832275		1.45229	0.851592	0.987144	0.832767	0.844304		0.777778	0.646796	1.00631	0.653171	0.722081
	0.920468	0.588878	0.770988	1.04382	1.22099	0.877905	0.656822	0.461804	1.03843		0.919031	0.872586	0.602269	0.915255	0.620158	0.858636	0.633793	1.16427	0.658553	0.697702	0.646738	1.01945	0.687394	0.978473	0.703712	0.814024	0.814874	0.637096	0.703399	0.702999	0.593092	0.767481		0.751803		1.35591	0.837037	0.951993	0.73576	0.605374		0.811081	0.637275	0.892887	0.691266	0.718138
	0.911462	0.589551	0.744913	0.811458	0.789411	0.890119	0.664106	0.606316	1.01964		0.844982	1.00104	0.601467	0.804721	0.56561	0.846515	0.627696	1.42821	0.631039	1.02407	0.691644	1.03874	0.804963	0.946611	0.592112	0.833851	0.884554	0.824662	0.801352	0.835818	0.624988	0.817846		0.720978		0.989981	0.7939	0.918841	0.654201	0.650686		0.855395	0.651355	0.718096	0.705664	0.735691
	0.85906	0.609376	0.681245	0.779243	0.798003	0.876922	0.662519	0.682529	0.944811		0.734001	1.14235	0.672267	0.727007	0.559436	0.70299	0.684545	1.00866	0.641232	0.990503	0.780024	0.990241	0.977312	0.922932	0.531749	0.799907	0.872472	0.747564	0.979741	0.816507	0.74197	0.961378		0.738825		1.10881	0.778292	0.887682	0.618561	0.699697		0.933728	0.686394	0.532563	0.694118	0.989268
	0.864289	0.646605	0.664121	0.860038	0.814931	1.48931	0.723341	0.747878	0.853616		0.671577	1.19591	0.778476	0.720554	0.589386	1.19328	0.732301	1.32068	0.700347	0.961485	0.847069	0.875439	0.64903	0.917224	0.536619	0.744055	0.798842	0.704508	1.12468	0.707591	0.893422	0.781043		0.794256		0.949655	0.812975	0.861757	0.718118	0.704179		1.07737	0.677132	0.539292	0.665591	0.564657
	0.928456	0.690621	0.661784	0.944392	0.859033	1.35114	0.634198	0.771558	0.767268		0.714224	1.14131	0.853001	0.773046	0.605676	0.95666	0.711842	0.68646	1.33458	0.944989	0.873655	0.816283	0.703767	0.884278	0.603182	0.727009	0.758336	0.779162	0.883497	0.616395	0.959118	0.750584		0.864171		1.11455	0.770195	0.874756	0.75924	0.660505		0.659892	0.609348	0.604705	0.638426	0.597265
	0.969038	0.658683	0.656561	1.04825	0.90885	1.21194	0.610806	0.742998	1.03004		0.984917	1.00254	0.82611	1.12115	0.592225	0.746921	0.626629	0.702729	1.25049	0.932658	0.759671	0.863419	0.730055	0.976058	1.04026	0.742314	0.811366	0.814558	0.700247	0.544974	0.898582	0.748697		0.85873		1.25562	0.608338	0.907099	0.82509	0.635123		0.740814	0.555996	0.677106	0.620834	0.79714
		0.682946	0.710761	1.04544	0.910629	1.08229	0.606128	0.66389	0.91492		1.33984	0.830853	0.721678	0.886163	0.553851	0.629153	0.960023	0.750468	1.0741	0.929541	0.976288	1.15243	0.755351	1.12464	0.671991	0.786495	0.92978	0.786638	0.696263	0.490187	0.812899	0.712285		0.784092		0.904306	0.561511	0.958081	0.872597	0.668136		0.78793	0.546125	0.733584	0.619262	0.832882
		0.670855	0.995194	0.954534	0.834107	0.972675	0.617929	0.519459	0.907839		1.31454	0.680412	0.629441	0.847857	0.54135	0.64792	0.794536	0.786045	0.875618	0.883701	1.08907	1.00767	0.775436	1.22862	0.553638	0.834549	1.02787	0.698735	0.709412	0.586015	0.75767	0.664922		0.726375		1.10287	0.608837	1.175	0.869993	0.736314		0.791721	0.778207	0.80123	0.639397	0.873098
		0.65388	0.871075	0.779654	0.79375	0.891807	0.633531	0.624826	0.960271		1.15708	0.548854	0.594679	0.912886	0.515143	0.770961	0.692955	0.72179	0.74613	0.798189	0.718071	1.02147	0.816467	1.2497	0.569233	0.84433	0.771849	0.597263	0.682012	0.528933	0.730278	0.687081		0.748494		1.29332	0.702485	0.996873	0.776739	0.834079		0.8012	0.682835	0.86092	0.692014	0.772045
		0.635285	0.755701	0.820834	0.77973	0.868794	0.640051	0.791415	1.01035		1.0505	0.971926	0.628782	1.00806	0.484626	0.868448	0.690476	0.720269	0.681962	0.685133	0.606534	1.04529	0.828387	1.20153	0.635672	0.84165	0.84516	0.5421	0.655854	0.581429	0.888442	0.814775		0.705324		0.818347	0.770732	0.951502	0.690906	0.648605		0.826096	0.651682	0.90411	0.617714	0.73606
		0.637244	0.666427	0.880905	0.7966	0.906185	0.65218	0.883337	0.988526		0.970266	1.06703	1.02319	1.0613	0.424033	0.817666	0.755359	0.740461	0.654604	1.00443	0.664431	0.987427	0.790593	1.12933	0.70329	0.894646	0.84907	0.507454	0.716301	0.672285	0.680604	0.91817		0.777839		1.04312	0.766665	0.948679	0.643795	0.68054		0.850503	0.648489	0.895389	0.681302	0.725225
		0.631942	0.639432	0.918209	0.844753	0.957928	0.735883	0.881344	0.98844		0.906691	1.01086	0.871754	1.04468	0.474203	0.686873	0.802978	0.773379	0.649802	0.970838	0.754794	0.874452	0.754725	1.05508	0.713025	0.757383	0.799289	0.970445	0.859928	0.744556	0.596088	1.00326		0.845946		1.24543	0.738029	0.975705	0.64867	0.686341		0.878155	0.665911	0.972968	0.728766	0.716561
		0.677292	0.663167	0.911337	0.905061	0.977092	0.632501	0.782293	0.926452		0.870523	0.923031	0.757296	0.977527	0.517191	0.639115	0.779292	0.788061	0.66069	0.998413	0.815563	0.83214	0.748514	0.966563	0.648214	0.791876	0.759146	0.81709	1.00443	0.715735	0.574457	0.900053		0.823283		0.933189	0.73934	0.999404	0.818366	0.664307		0.932071	0.705189	1.01099	0.733771	0.772108
		0.705076	0.70774	0.76329	0.940269	0.953078	0.628673	0.589433	0.853296		0.883071	0.920612	0.651094	0.903055	0.723679	0.702393	0.701333	0.770703	0.67193	1.02387	0.829171	0.888123	0.720412	0.879016	0.557158	0.872397	0.78249	0.729864	0.846632	0.640195	0.584053	0.813712		0.732394		1.1328	0.782749	0.998982	0.796887	0.658495		0.656237	0.751712	0.964253	0.695357	0.524745
		0.73609	0.740559	0.782236	0.91391	0.901078	0.639981	0.893358	0.764087		0.930557	1.001	0.559542	0.872125	0.630877	0.815515	0.587009	0.689481	0.674744	1.00566	0.84158	0.934079	0.663798	0.833267	0.50994	0.913999	0.870497	0.699193	0.672197	0.553154	0.588474	0.806321		0.693598		0.809543	0.851428	0.964002	0.876366	0.68025		0.742554	0.723071	0.858356	0.642817	0.659788
		0.660828	1.18082	0.803046	0.847963	1.45684	0.653077	1.06899	1.01246		0.939296	1.05912	0.614524	0.903627	0.56708	0.881692	1.06231	0.696365	0.699467	0.957507	0.741971	1.3823	0.657499	0.886738	0.525026	0.882661	0.957004	0.694243	0.664291	0.479066	0.588735	0.886472		0.717472		1.02372	0.852638	0.911926	0.846628	0.742994		0.792633	0.62751	0.752416	0.611798	0.897162
		0.686569	0.994921	0.808706	1.0976	1.39858	0.662412	1.07618	0.934285		0.88722	1.01532	0.690037	0.859036	0.515185	0.848601	0.917528	0.744714	1.15846	0.888915	1.00262	1.06355	0.746951	0.926481	0.610883	0.801621	0.990616	0.676535	0.673104	0.598661	0.628829	0.882792		0.670216		0.953807	0.689378	0.863088	0.748961	0.83145		0.815234	0.559351	0.53431	0.613793	1.00243
		0.706688	0.812913	0.791869	0.954227	1.28304	0.679726	0.933436	0.941354		0.793033	0.858785	0.902354	0.888369	0.50189	1.32416	0.797413	0.78335	0.970302	0.78642	0.692635	0.964234	0.916103	1.05004	0.557962	0.754645	0.740314	0.628726	0.647326	0.569813	0.744837	0.778342		0.73416		1.09631	0.603148	0.860098	0.663452	0.634806		0.831542	0.537247	0.558834	0.641343	0.94082
		0.713137	0.679637	0.744527	0.853668	1.1451	0.767461	1.05028	0.968923		0.737001	0.566274	1.03862	0.848785	0.519792	1.12711	0.744081	0.789982	0.812617	0.672425	0.586967	0.996688	0.562782	1.17541	0.539153	0.765249	0.79925	0.558276	0.618192	0.611317	0.869376	0.758986		0.794707		1.12759	0.605325	0.918439	0.641613	0.653222		0.849672	0.953757	0.606749	0.685075	0.827282
		0.722901	0.634095	0.763281	0.788776	1.00465	0.666151	1.26832	0.975738		0.756256	1.17003	1.01136	0.920445	0.535303	0.870051	0.769795	0.78069	0.724835	0.939926	0.641063	0.96307	0.6117	1.26646	0.571606	0.80661	0.814385	0.487527	0.657333	0.664839	0.890369	0.741389		0.74924		1.1465	0.653723	0.981445	0.676619	0.668651		0.858201	0.733076	0.658529	0.656447	0.761496
		0.724747	0.670135	0.769984	0.766552	0.886137	0.675033	1.26537	0.961951		1.0005	1.3507	0.83952	1.01722	0.541652	0.692217	0.829197	0.769701	0.677045	0.938682	0.736822	1.01736	0.675539	1.30795	0.608051	0.853132	0.783436	1.16213	0.767185	0.688263	0.824365	0.702602		0.663665		0.97251	0.703314	0.978312	0.892693	0.689847		0.848224	0.649189	0.708792	0.616507	0.736172
		0.718188	0.733082	0.756239	0.781456	0.824304	0.673946	1.06915	0.934704		1.39235	1.25205	0.665474	1.06307	0.533122	0.621831	0.856462	0.781366	0.656121	0.991767	0.79422	0.930483	0.696778	1.2736	0.612614	0.860112	0.734815	1.00764	0.891073	0.650824	0.754425	0.686417		0.655386		1.03868	0.697097	1.08469	0.911627	0.722097		0.590916	0.63214	0.787418	0.683171	0.726992
		0.689744	0.762556	0.813252	0.824879	0.849333	0.716573	1.15522	0.901006		1.34576	1.04134	0.572588	1.04364	0.521163	0.673101	0.820989	0.652331	0.66413	1.05018	0.793615	0.89428	0.707264	1.15174	0.572896	0.847202	0.726354	0.832814	0.850641	0.590224	0.724446	0.708798		0.966301		1.10192	0.67149	0.921197	0.898422	0.775316		0.659562	0.650548	0.843201	0.744821	1.10929
		0.707722	1.15455	0.821479	0.874779	0.928036	0.732653	1.36837	0.859051		1.09519	0.859337	0.582973	1.01282	0.50566	0.798134	0.640831	0.681841	0.702697	1.02229	0.788454	0.914628	0.72624	0.98445	0.517228	0.734273	0.781613	0.699548	0.651063	0.515565	0.793065	0.749557		0.682002		1.1354	0.677977	0.926623	0.835275	0.585166		0.729028	0.687157	0.879906	0.752375	0.633779
		0.726752	0.899363		0.904538	0.999907	0.741491	1.3658	1.01623		0.916895	0.93056	1.10427	1.01916	0.490428	0.862142	0.628631	0.772787	0.725221	0.945502	0.833801	0.922228	0.756863	0.843061	0.491444	0.789091	0.86853	0.620663	0.617203	0.652715	0.656241	0.786479		0.638075		0.915308	0.734819	0.956944	0.743813	0.603777		0.773813	0.738359	0.932823	0.700704	0.613124
		0.767506	0.718208		0.892268	1.0162	0.741578	1.13818	0.96335		0.815665	0.988918	0.88579	1.08918	0.484812	0.796267	0.521031	0.836534	0.709917	0.86142	0.943474	1.25516	0.756984	0.766378	0.517018	0.890594	0.941805	0.58063	0.614205	0.661734	0.618785	0.82291		0.694528		0.992651	0.812456	0.982542	0.676293	0.650655		0.803626	0.774134	0.967381	0.63451	0.7932
		0.645999	0.646058		0.842989	0.985776	0.787842	1.09695	0.953627		0.799523	0.969032	0.749178	1.06766	0.50049	0.693801	1.00788	0.826959	0.703293	0.762781	0.713401	0.972637	0.742895	1.13137	0.591489	0.954158	0.952998	0.547475	0.603165	0.6695	0.615325	0.867338		0.74901		1.06247	0.672605	1.01828	0.662763	0.704959		0.82729	0.736587	0.936367	0.597683	0.983885
		0.698594	0.676241		0.769421	0.931582	0.824647	1.30951	0.946498		0.831902	0.651387	0.633852	0.940296	0.874075	0.66912	0.869373	0.787601	1.06908	0.873717	0.598967	0.896019	0.752445	0.898472	0.540271	0.925362	0.715364	0.494744	0.597808	0.647421	0.613058	0.914997		0.697305		0.762795	0.635151	1.02862	0.691443	0.757069		0.837769	0.64922	0.83709	0.627906	1.02743
		0.719514	0.748934		1.17199	1.21089	0.833186	1.32542	0.917467		0.89616	1.31201	0.567935	0.871815	0.697923	0.730166	0.787048	0.758857	0.881009	0.881463	0.641057	0.945869	0.785739	0.87557	0.537227	0.788558	0.746486	1.39741	0.635789	0.617509	0.598239	0.962234		0.618415		0.859812	0.666294	0.997091	0.762801	0.826764		0.82457	0.585921	0.534734	0.661652	0.937928
		0.760687	1.29799		1.00711	1.24705	0.808198	1.10575	0.85228		0.944087	1.48786	0.574558	0.910417	0.594761	0.752347	0.776947	1.03271	0.787396	0.938886	0.729304	1.04926	0.779769	0.942063	0.538676	0.732721	0.762805	1.26044	0.716915	0.554282	0.593134	0.990443		0.634865		0.937957	0.695808	0.95175	0.974922	0.561162		0.740911	0.55783	0.561113	0.686779	0.82064
		0.796119	0.992459		0.901164	1.27235	0.816006	1.17194	0.863481		0.94829	1.51129	0.765022	0.974081	0.529707	0.884953	0.831234	0.737207	0.727583	0.997661	0.771656	1.10041	0.721257	1.07006	0.527058	0.770349	0.748827	1.00653	0.809568	0.762284	0.646348	1.14153		0.745242		0.975607	0.66825	0.909866	0.82612	0.62811		0.636505	0.945363	0.60263	0.674491	0.772143
		0.823917	0.778028		0.823469	1.25386	0.896812	0.963098	0.860824		0.901486	1.15259	0.992721	1.0109	0.488423	1.35699	0.892388	0.640149	0.692472	0.973912	0.764031	1.05703	0.682554	1.17142	0.502519	0.804445	0.704672	0.767242	0.905944	0.725626	0.762976	0.862936		0.901876		0.705532	0.632473	0.892707	0.845604	0.695623		0.667269	0.719563	0.647762	0.630171	0.740589
		0.815924	0.680112		0.772691	1.18318	0.94451	1.00033	1.02432		0.835051	0.956523	1.1841	1.0185	0.485837	1.07443	0.897738	0.688221	0.666726	0.886583	0.755203	0.989101	0.719995	1.30185	0.477777	0.862576	0.671077	0.597448	0.655773	0.680204	0.863951	0.788916		0.640819		0.808311	0.642762	0.890352	0.770294	0.771039		0.695084	0.631019	0.709878	0.684936	0.714703
		0.780036	0.693518		0.753618	1.06832	0.934945	0.922688	0.992387		0.797863	0.895396	1.16386	1.05256	0.533092	0.801457	0.843149	0.798938	0.685824	0.810094	0.808615	0.941814	0.832212	1.30749	0.4718	0.83317	0.696599	0.506766	0.575106	0.630512	0.861229	0.760894		0.606929		0.878623	0.700671	0.988153	0.731148	0.879832		0.717545	0.580016	0.781766	0.745003	0.78172
		0.743881	0.764975		0.767153	0.929195	1.03734	0.867298	0.969194		0.811175	0.938217	0.93392	1.17265	0.586518	0.665632	0.753033	0.877194	0.736621	0.732499	0.661018	0.889903	0.994876	1.21217	0.502844	0.706789	0.784276	0.462789	0.569328	0.516715	0.791037	0.722333		0.683644		0.666697	0.775036	0.99766	0.722978	0.607474		0.755121	0.64082	0.829791	0.752639	0.685156
		0.73967	1.37046		0.80296	0.827222	0.836599	0.767038	0.931425		1.02624	0.824365	0.691964	0.917738	0.604831	0.641406	0.655502	0.854363	0.743836	0.829012	0.681132	1.45935	0.612354	0.971771	0.56461	0.744951	0.889683	1.48063	0.583222	0.862833	0.729727	0.691528		0.749089			0.707166	0.923594	0.73927	0.687673		0.790473	0.688782	0.825888	0.688189	0.780889
		0.777535	1.07447		0.839332	0.792973	0.925878	0.699566	0.876741		1.436	1.34032	0.556603	0.90056	0.575307	0.705645	0.584158	0.790033	0.705197	0.860555	0.735831	1.09781	0.594927	0.793355	0.53458	0.847943	0.959271	1.18622	0.60615	0.792016	0.723751	0.696177		0.701787			0.721967	0.93058	0.79082	0.786662		0.796583	0.743483	0.925273	0.623624	0.969338
		0.860984	0.851858		0.860761	0.838099	0.992006	0.937725	0.817414		1.35627	1.70544	0.562856	0.912688	0.524247	0.786704	0.594508	0.734169	0.686446	0.896112	0.751594	0.861058	0.631865	0.698641	0.50886	0.917958	0.945298	0.871863	0.645657	0.689889	0.78801	0.697631		0.620036			0.724904	0.975938	0.82183	0.69843		0.754645	0.768234	0.900724	0.617165	1.07065
		0.68341	0.734628		0.857433	0.924653	1.0443	0.931754	0.773246		1.10215	1.6847	1.23119	0.920963	0.495812	0.80397	1.14467	0.696477	0.824111	0.87268	0.740264	0.803649	0.65453	1.02994	0.47869	0.904274	0.69544	0.610663	0.703611	0.814201	0.668326	0.660484		0.629624			0.690693	1.00991	0.868756	0.797331		0.721664	0.736039	0.803323	0.659801	1.01971
		0.742922	0.720027		0.827797	0.983267	0.812678	0.936603	1.02951		0.890987	1.36696	0.915049	0.878214	0.505095	0.746559	0.965464	1.18264	0.759188	0.797841	0.757778	0.886861	0.65536	0.885696	0.454467	0.841396	0.698033	1.31246	0.756349	0.71214	0.640337	0.661069		0.720449			0.657141	1.03149	0.823316	0.801717		0.661537	0.668956	0.549706	0.708212	0.902582
		0.785238	1.12867		0.775536	0.994916	0.850849	0.902907	1.00672		0.77298	0.932778	0.745284	0.791864	0.530942	0.688464	0.844318	0.877455	0.71652	0.727338	0.849397	1.05375	0.671711	0.839056	0.447064	0.746291	0.712147	0.971172	0.686713	0.947095	0.629119	0.796028		0.836401			0.663338	1.03514	0.801979	0.795871		0.651437	0.625883	0.569193	0.707775	0.816885
		0.846853	0.923234		1.21941	0.976246	0.876599	0.815516	0.956045		0.769702	1.53756	0.622545	0.760426	0.555531	0.685831	0.782092	0.6793	0.688361	0.672886	0.785163	1.20912	0.683682	0.86139	0.457854	0.79026	0.710959	0.757071	0.565192	0.834337	0.616553	0.992128		0.602938			0.706156	1.02289	0.794197	0.833785		0.663575	0.597249	0.600527	0.679725	0.764025
		0.893117	0.802199		1.01746	0.948095	0.91119	0.721929	0.858095		0.83259	1.48078	0.557505	0.73404	1.06719	0.671947	0.793214	0.63353	0.681508	0.788873	0.774146	1.23242	0.674607	0.931005	0.563235	0.821692	0.681027	0.657823	0.565795	0.791304	0.596054	1.12982		0.599569			0.712976	1.00923	0.800633	0.853588		0.664765	0.950747	0.644402	0.6416	0.717194
		0.900648	1.99978		0.884548	1.01202	0.966124	0.889989	0.788942		0.904889	0.810098	0.598485	0.699354	0.835067	0.800425	0.850672	0.662467	0.706988	0.7675	0.785257	1.12584	0.685188	1.19733	0.520697	0.869965	0.640367	0.578651	0.604663	0.806483	0.600603	1.16818		0.701535			0.706752	0.990605	0.834418	0.846502		0.698081	0.722419	0.704212	0.669854	0.682676
		0.853887	1.6936		0.813353	0.995074	0.7308	0.898033	1.0687		0.918906	0.766191	0.764395	0.648153	0.663795	1.39836	0.91196	0.813536	0.736523	0.77132	0.756479	0.978947	0.735207	1.31212	0.474506	0.829473	0.646059	0.540241	0.639245	0.889011	0.668888	1.0699		0.780657			0.744777	0.967423	0.836587	0.777765		0.736991	0.624242	0.753877	0.732746	0.884979
		0.791896	1.30226		0.768255	1.01363	0.767929	0.970342	0.994305		0.891715	0.661248	0.951191	0.84321	0.569905	0.998018	0.916917	0.880997	0.712764	0.748069	0.715554	0.830078	0.804671	1.3339	0.435124	0.668984	0.721453	0.548024	0.664236	0.890352	0.781448	1.10939		0.734166			0.755119	0.950361	0.850888	0.765336		0.741869	0.602623	0.732793	0.733898	0.698903
		0.765011	1.02422		0.74026	1.04841	0.772232	0.935621	1.02288		0.847679	0.600512	1.2355	0.970448	0.527518	0.745615	0.852278	0.856636	0.664447	0.696358	0.747473	1.23171	0.828028	1.19671	0.430212	0.672891	0.837194	0.586859	0.690056	0.758692	0.856112	0.873752		0.637433			1.04007	0.9611	0.859686	0.792781		0.701384	0.622719	0.850198	0.668298	0.740586
		0.789849	1.17598		0.734769	1.06913	0.782257	0.852826	0.940353		0.831862	0.690541	1.21339	1.00115	0.514649	0.652772	0.763867	0.779015	0.64368	0.63464	0.93198	0.898522	0.784435	0.907895	0.926652	0.751207	0.935227	0.76981	0.603292	0.781212	0.843119	0.796719		0.621939			0.968788	0.97633	0.86619	0.809547		0.649272	0.667706	0.834872	0.591366	0.943285
		0.876457	1.28377		0.748038	1.04316	0.811492	0.741156	0.809941		0.828218	0.935922	0.963625	0.977843	0.544253	0.5844	0.682977	0.712874	0.824562	0.683279	0.916897	0.73549	0.724708	0.718447	0.956074	0.821597	0.968132	0.673847	0.613512	0.848865	0.783888	0.74975		0.691514			0.962869	0.956088	0.874066	0.860135		0.659891	0.727286	0.738372	0.627958	1.15107
		0.741102	1.96831		0.776132	0.957779	0.875287	0.64643	1.05965		0.876884	1.20562	0.703535	0.930818	0.629622	0.698363	0.635391	0.679091	0.715303	0.654723	1.02179	0.719415	0.709551	0.637824	0.926698	0.842204	0.671566	0.603356	0.665153	0.895062	0.736428	0.705061		0.593161			0.965167	0.975924	0.886717	0.825545		0.663782	0.76241	0.600536	0.696015	1.18264
		0.805442	1.80091		0.801217	0.845479	0.732975	0.846427	1.06419		0.932776	0.866462	0.560401	0.853379	0.720943	0.740161	0.658548	0.992014	0.672735	0.627853	1.00538	0.836846	0.757013	0.908999	0.851355	0.823208	0.664107	0.563842	0.686519	0.88722	0.737797	0.685909		0.613099			0.898303	1.02676	0.789001	0.794271		0.656861	0.73756	0.569174	0.76962	1.0468
		0.863119	1.36174		0.820389	0.777158	0.724063	0.911848	1.03595		1.40931	0.965074	0.574481	0.677093	0.737894	0.738385	0.947124	0.736587	0.671057	0.599828	1.00845	0.984488	0.870164	0.864788	0.61827	0.815499	0.678964	0.566887	0.66266	0.866507	0.715594	0.681763		0.720917			0.854991	1.02654	0.858809	0.783821		0.66318	0.687365	0.560236	0.667526	0.878264
		0.921478	1.01068		0.826618	0.780181	0.706897	0.955009	1.24875		1.36049	1.03673	0.962249	0.615651	0.654741	0.707246	0.857847	0.622024	0.694396	0.512337	1.02474	1.3086	0.603041	0.84579	0.736582	0.829282	0.687832	0.604613	0.695434	0.874069	0.645804	0.64022		0.789263			0.838017	1.00112	0.893737	0.771938		0.67862	0.659038	0.575517	0.638732	0.776603
		0.941517	0.905098		0.815329	0.834751	0.710232	0.94303	1.13115		1.16304	0.990136	0.752149	0.735301	0.538498	0.681705	0.797966	0.629708	0.722517	1.49809	1.08744	1.26343	0.592563	0.853472	0.804954	0.859615	0.679323	0.653146	0.726619	0.926147	0.614918	0.592356		0.742062			0.880765	1.01414	0.9224	0.766934		0.619748	0.643577	0.623604	0.673083	0.726466
		0.908105	0.979644		0.775794	0.890832	0.744181	0.869099	1.11031		0.935417	0.830763	0.627501	0.918711	0.48908	0.677948	0.800101	0.715258	0.708728	1.50029	1.09011	1.24974	0.598392	0.954303	0.833763	0.803539	0.645734	0.709757	0.721515	0.666087	0.577898	0.675645		0.648732			0.843304	1.0303	0.755402	0.788849		0.666331	0.961926	0.66546	0.714893	0.679513
		0.838812	1.11429		1.23584	0.915589	0.810764	0.754253	0.784238		0.786851	0.663107	0.559829	1.08495	0.528081	0.685308	0.845801	0.80963	0.652679	1.46194	1.10281	0.995131	0.604103	1.15955	0.838056	0.633666	0.638377	0.689811	0.822888	0.64935	0.575874	0.93353		0.626649			0.787918	1.03104	0.824803	0.7704		0.69646	0.727892	0.708698	0.709144	0.641813
		0.796858	1.22852		1.06514	0.92283	0.927603	0.65677	0.711661		0.740624	0.613821	0.589106	1.16947	0.593721	1.37046	0.893002	0.853751	0.595339	1.38809	1.13466	0.759504	0.630176	1.36224	0.832756	0.603143	0.692243	0.6152	0.879357	0.830555	0.598713	1.19702		0.668371			0.635513	1.00115	0.950552	0.78351		0.690288	0.623324	0.744859	0.649361	0.688926
		0.81247	1.96196		0.887043	0.932796	0.732156	0.810505	0.844396		0.785374	0.757755	0.741729	1.17348	0.624709	0.928416	0.893505	0.826923	0.719531	1.3005	1.21364	0.985277	0.636631	1.37654	0.488954	0.6525	0.797116	0.585573	0.916347	0.978053	0.679559	1.27561		0.749093			0.738379	0.940418	0.918439	0.797095		0.666722	0.590101	0.72773	0.604521	0.642757
		0.901407	1.87851		0.788733	0.944884	0.694684	0.862051	0.808889		0.830427	1.084	0.916604	1.11417	0.961029	0.716695	0.836504	0.764763	0.63763	1.35412	1.19123	0.727636	0.625311	1.13927	0.550559	0.722538	0.906814	0.599275	0.820967	0.972742	0.775633	1.29663		0.609209			0.803405	0.910366	0.86706	0.806		0.610756	0.60178	0.663191	0.631926	0.778834
		0.796776	1.52356		0.739994	0.963583	0.650674	0.860252	0.774833		0.822427	0.830204	1.17273	1.00481	0.752316	0.636509	0.761784	0.708812	0.641286	1.29009	1.19957	0.628811	0.65237	0.837732	0.618768	0.772014	0.969617	0.650451	0.766221	0.83216	0.821352	1.09464		0.634399			0.885516	0.956501	0.914365	0.799084		0.680577	0.649345	0.559492	0.714131	1.04565
		0.863301	1.09306		0.715065	0.860934	0.66438	0.916401	0.651737		0.780524	0.952103	1.13888	0.856139	0.610049	0.622636	0.704817	0.696576	0.685367	1.23378	1.22121	0.604673	0.721964	0.65034	0.68771	0.809009	0.647761	0.705918	0.866388	0.719521	0.805035	1.07232		0.713174			0.851725	1.01594	0.912785	0.774286		0.742284	0.714526	0.526271	0.808671	1.29283
		0.915304	0.811897		0.703176	0.815564	0.698559	0.864116	0.879718		0.760869	1.11808	0.922046	0.68687	0.561103	0.644147	0.690382	1.1546	0.704798	1.19462	1.29711	0.825826	0.806505	0.583497	0.744335	0.843955	0.649431	0.732359	0.713655	0.73467	0.768829	0.87284		0.751141			0.770798	0.980293	0.873348	0.745856		0.762389	0.750591	0.551549	0.643757	1.312
		0.949876	0.750088		0.706332	0.817719	0.763953	0.740902	0.897417		0.793607	1.24222	0.702837	0.84579	0.582509	0.678324	0.745257	0.826899	0.66022	1.17355		1.08283	0.852334	0.889764	0.795512	0.893612	0.665657	0.743789	0.793991	0.844075	0.749605	0.785675		0.712536			0.704072	0.98944	0.82407	0.763441		0.618399	0.755338	0.586888	0.633488	1.11282
		0.935456	0.837947		0.722307	0.850675	0.856249	0.698413	0.874597		0.847846	1.19021	0.588934	1.00908	0.629511	0.697078	0.948845	0.645522	0.586302	1.15543		1.3606	0.810899	0.821048	0.838409	1.00732	0.688128	0.766942	0.866828	0.699556	0.746734	0.728618		0.65205			0.659457	1.04078	0.898618	0.732729		0.70071	0.695752	0.616797	0.671715	0.794683
		0.880661	0.975751		0.74605	0.884615	0.696277	0.6635	0.852225		0.925956	0.97753	0.626286	1.18312	0.692148	0.693659	1.14477	0.583856	0.508675	1.07612		1.46716	0.734083	0.861499	0.857535	0.750555	0.695766	0.660316	0.911576	0.567358	0.601329	0.658524		0.641334			0.668257	1.03288	0.923186	0.738535		0.792236	0.668416	0.626712	0.702703	0.731114
		0.832463	1.0943		0.768265	0.87797	0.675644	0.788741	0.773829		1.30644	0.734942	0.797207	1.30564	0.779692	0.677576	0.842348	0.629424	0.665644	1.0386		1.16112	0.691069	0.893236	0.468092	0.590046	0.672331	0.598187	0.60663	0.693883	0.576207	0.669467		0.668807			0.747029	0.993485	0.907475	0.756258		0.634095	0.676584	0.596312	0.689813	0.680633
		0.843046	1.14959		0.787212	0.811601	0.646557	0.806842	0.778459		1.44336	0.598067	0.6658	1.33216	0.795765	0.635856	0.804991	0.7233	0.626992	1.04042		0.970147	0.701442	0.911943	0.506879	0.560596	0.65226	0.612426	0.769387	0.958604	0.543859	0.64043		0.612962			0.874896	0.996694	0.843168	0.78809		0.717785	0.979125	0.537538	0.636447	0.645834
		0.945218	1.91509		0.798883	0.742833	0.640613	0.842252	0.816565		1.22456	0.661264	0.593496	1.26663	0.784527	1.30573	0.825524	0.80106	0.650446	1.08779		0.692614	0.775701	0.976225	0.53313	0.591215	0.683723	0.662206	0.851321	1.13893	0.52665	0.579795		0.629126			1.05064	1.01695	0.76555	0.797173		0.842309	0.732501	0.505451	0.607103	0.62127
		0.840366	1.63743		0.800713	0.728909	0.657752	0.85781	0.91872		0.988119	0.977819	0.598424	1.12639	0.707517	0.91401	0.851279	0.818858	0.650709	0.955767		0.797327	0.641594	1.13483	0.563645	0.652262	0.773764	0.779691	0.976272	1.03678	0.582776	0.591534		0.678473			0.888573	1.00778	0.907102	0.773655		0.674442	0.621891	0.527766	0.637215	0.612631
		0.901062	1.24706		0.773835	0.77234	0.723694	0.843715	0.972205		0.802698	0.711125	0.71069	0.949105	0.548411	0.709977	0.846627	0.790032	0.594561	0.880384		0.615028	0.567519	1.31159	0.610047	0.724969	0.888513	0.820483	0.551566	0.771895	0.668655	0.803417		0.696781			0.758323	0.952293	0.966028	0.75646		0.757654	0.584797	0.541741	0.709765	0.624264
		0.938161	0.904156		1.14509	0.82668	0.783725	0.809454	0.965135		0.717085	0.85474	0.899147	0.755235	0.508004	0.611043	0.806039	0.752089	0.513276	0.872432		0.566212	0.542443	1.2088	0.6716	0.800755	0.980798	0.792721	0.785046	0.621053	0.742147	1.13311		0.691666			0.722947	0.882926	0.95382	0.756825		1.00762	0.596447	0.529851	0.799606	0.79316
		0.945993	0.706653		0.938382	0.844891	0.848101	0.75016	0.945182		0.713716	1.02744	1.02404	0.98453	0.582973	0.570076	0.757486	0.72756	0.647985	0.93001		0.575053	0.559552	1.0126	0.739128	0.89399	1.00662	0.749771	0.943516	0.6614	0.76575	1.35624		0.686131			0.624388	0.866974	0.867234	0.795313		0.870534	0.654962	0.766713	0.635615	1.08188
		0.912143	0.678124		0.791285	0.837903	0.67184	0.749672	0.936848		0.737404	1.2441	0.984436	0.883983	0.659005	0.585099	0.73365	0.721635	0.604634	1.03002		0.847226	0.600388	0.809209	0.813628	0.839382	0.625436	0.737976	0.998634	0.823037	0.750516	1.39701		0.690438			0.629165	0.960676	0.758875	0.724573		1.11807	0.73517	0.924484	0.676412	1.35587
		0.878196	0.754169		0.725143	0.844919	0.664704	0.798237	0.757725		0.730939	1.41238	0.834735	0.932916	0.834013	0.637957	0.75262	0.738638	0.577308	1.09299		1.12945	0.618412	0.610179	0.873968	0.675039	0.642755	0.841525	0.824798	0.849555	0.738473	1.29129		0.705223			0.645627	1.06127	0.707741	0.704902		0.976541	0.808156	0.960354	0.70038	1.34224
		0.90121	0.866538		0.695314	0.876918	0.645795	0.750933	0.738026		0.711664	1.35925	0.702594	1.07629	0.655097	0.682566	0.96115	0.962178	0.526728	0.8203		1.3842	0.618061	0.534405	0.462826	0.581863	0.6658	0.675749	0.97073	0.584203	0.750307	1.07662		0.577846			0.731092	1.02453	0.9006	0.708964		0.833107	0.770682	0.783083	0.683749	1.16961
		1.03691	0.968902		0.679619	0.940302	0.639748	0.756528	0.828681		0.722816	1.08743	0.658767	1.24616	0.565721	0.694369	0.902922	0.718551	1.05756	0.751344		1.43382	0.650286	0.822098	0.50414	0.54976	0.696163	0.63267	0.967125	0.5484	0.600095	1.00039		0.594856			0.874674	1.07682	0.975259	0.739369		1.08499	0.696673	0.916769	0.638928	0.877243
		0.898498	0.97355		0.673918	1.10175	0.65503	0.783666	0.965173		0.785664	0.785475	0.745253	1.3873	0.588101	0.661535	0.823996	0.596333	1.06437	0.766421		1.21525	0.716171	0.802221	0.527194	0.57239	0.678906	0.690099	0.870116	0.742792	0.528339	0.843034		0.636983			1.01569	1.03513	0.974381	0.771722		0.968295	0.671524	0.939033	0.623551	0.688433
		0.933011	1.70202		0.676779	0.895261	0.685098	0.754893	1.05059		0.869831	0.608588	0.664897	1.43684	0.703259	1.22652	0.810279	0.571987	1.01163	0.854896		0.888003	0.793752	0.888779	0.534286	0.621793	0.690073	0.817967	0.962016	1.11175	0.468918	0.753718		0.681365			1.10854	0.992325	0.904983	0.765018		1.12087	0.709253	0.891752	0.654457	0.630903
		0.952965	1.33819		0.694263	0.756407	0.720586	0.796419	1.06831		1.10612	0.639122	0.631369	1.35978	0.820174	0.933124	0.81497	0.633035	0.944547	0.966262		0.630869	0.837749	0.955956	0.541773	0.700349	0.657999	0.921138	0.889859	1.22225	0.496151	0.69501		0.72712			0.971643	0.996759	0.804864	0.757191		0.961736	1.02675	0.786773	0.704988	0.63868
		0.947089	1.0163		0.718034	0.696225	0.766994	0.888183	1.04363		1.45713	0.944463	0.677655	1.19912	0.893378	0.727091	0.801	0.661286	1.16507	1.00834		0.55804	0.792733	0.968441	0.564654	0.81251	0.672895	0.914599		1.07771	0.548359	0.665064		0.755508			0.832215	1.00664	0.735536	0.75307		0.971466	0.754547	0.686236	0.755605	0.665991
		0.946802	0.770334		0.740998	0.696666	0.615806	0.845543	1.0196		1.29971	0.727534	0.782828	0.990794	0.923258	0.595424	0.775406	0.793416	1.14967	0.86524		0.535463	0.704616	0.989444	0.613012	0.82743	0.757274	0.819337		0.726454	0.633389	0.623432		0.764296			0.741919	0.958733	0.758965	0.76948		1.05557	0.635889	0.754725	0.652778	0.613856
		0.827641	0.676646		0.763618	0.724433	0.655782	0.731278	0.696208		1.04833	0.905031	0.802184	0.785686	0.916066	0.542531	0.755079	0.798373	1.14491	0.756951		0.627308	0.666141	1.10157	0.68308	0.697487	0.885058	0.698078		0.559648	0.695217	0.599007		0.533732			0.672913	0.876085	0.939187	0.726213		1.00233	0.603427	0.859617	0.690585	0.642731
		0.768505	0.671935		0.783326	0.751492	0.663625	0.712729	0.723676		0.872116	1.10702	0.821903	1.15716	0.832705	0.564391	0.759629	0.778952	1.11061	0.76079		0.771275	0.681108	1.27606	0.772081	0.615077	1.00306	0.656109		0.621206	0.709724	0.556693		0.550799			0.652797	0.809871	0.948166	0.68316			0.627562	0.920127	0.703354	0.805296
		0.72501	0.726394		0.791599	0.731587	0.657114	0.666571	0.83915		0.787656	1.35435	0.754704	0.97671	0.686596	0.623695	0.81124	0.765757	1.03295	0.826692		1.16625	0.742461	1.31705	0.860271	0.572467	1.05483	0.69278		0.799541	0.697596	0.661783		0.627268			0.654216	0.831678	0.919067	0.665803			0.708532	0.907212	0.685648	1.0721
		0.731053	0.802789		0.764132	0.684527	0.651015	0.702429	0.988644		0.766506	1.51598	0.723946	0.905084	0.563145	0.669198	1.01387	0.756353	0.957063	0.854704		1.36102	0.870458	1.1165	0.467619	0.564504	0.610857	0.812023		0.990262	0.69256	0.968438		0.725704			0.676955	0.962548	0.869905	0.693314			0.810175	0.85279	0.658418	1.32774
		0.985686	0.868044		1.23555	0.654465	0.647296	0.807509	1.11488		0.763917	1.42644	0.778316	0.957046	0.552897	0.654757	0.987979	0.741724	0.920701	0.931522		1.30955	0.574541	0.82811	0.495764	0.579452	0.628972	0.705357		0.712305	0.423574	1.27651		0.826816			0.749323	1.08227	0.820622	0.733759			0.832694	0.835232	0.659264	1.3796
		0.981147	0.922767		1.05233	0.688356	0.661545	0.934659	1.14355		0.75215	1.13446	0.852941	1.08363	0.633718	1.15767	0.862994	0.728451	0.962771	0.82851		1.05402	0.533456	0.608504	0.525017	0.623026	0.659224	0.709246		0.560435	0.413402	1.39412		0.86418			0.865246	1.05564	0.802153	0.743351			0.761683	0.707753	0.691523	1.18409
		0.927008	1.38356		0.842497	0.763694	0.704372	1.00083	1.1431		0.745013	0.802541	0.767168	1.23313	0.721763	0.958373	0.820523	0.826426	1.26099	1.09353		0.76586	0.537472	0.494686	0.540109	0.703052	0.691446	0.812666		0.601608	0.476501	1.33273		0.598231			0.98264	1.13495	0.847545	0.744292			0.69456	0.710163	0.684201	0.892197
		0.869799	1.06065		0.727345	0.820135	0.654955	0.873694	0.756641		0.778247	0.622706	0.687022	1.38055	0.973743	0.755692	0.799742	0.656511	1.22733	0.906732		0.513908	0.587514	0.836334	0.544587	0.830621	0.703088	0.960706		0.918351	0.574915	1.19708		0.542903			0.990561	1.07944	0.881611	0.729661			0.693322	0.773004	0.721698	0.671199
		0.862104	0.845544		0.684402	0.816128	0.702098	0.736509	0.676889		0.86375	0.64884	0.651135	1.45266	0.726229	0.617919	0.769762	0.590549	1.1871	0.827621		0.59873	0.622372	0.820057	0.541229	0.680167	0.678533	1.03381		1.1581	0.642252	1.04417		0.557433			1.0904	1.02771	0.903634	0.714797			0.766343	0.784574	0.70562	0.604099
		0.929798	0.721631		0.670404	0.792006	0.69312	0.613494	0.731884		1.1472	0.952156	0.669465	1.38583	0.582111	0.570741	0.741495	0.591795	1.11206	0.800507		0.775891	0.636364	0.930378	0.540639	0.608299	0.638853	0.957795		1.33479	0.662203	1.15107		0.667701			0.91146	1.03107	0.907283	0.701271			1.12183	0.855636	0.708239	0.665549
		1.08667	0.683927		0.663627	0.79237	0.657968	0.79389	0.848745		1.2778	0.532839	0.692537	1.12251	0.551178	0.599057	0.743282	0.621488	1.0077	0.812438		1.0407	0.655602	0.985444	0.565026	0.581212	0.649557	0.804344		1.08075	0.654334	0.921059		0.824592			0.789319	1.03716	0.884777	0.671517			0.806501	0.934399	0.695618	0.784203
		1.09262	0.700506		0.658199	0.841925	0.624417	1.00246	0.992071		1.15703	0.629289	0.697779	0.98561	0.657263	0.642059	0.788255	0.687174	0.924986	0.78963		1.27152	0.69289	0.969693	0.624684	0.576092	0.738326	0.681588		0.704329	0.85902	0.795354		0.970615			0.708001	0.967373	0.84286	0.654298			0.684312	0.988757	0.685411	0.671614
		1.06506	0.735622		0.659335	0.950261	0.6202	0.968766	1.13316		1.07237	0.796813	0.720193	0.780521	0.861508	0.63955	1.11078	0.786571	0.894768	0.903246		1.13532	0.75475	0.957296	0.715988	0.582577	0.881629	0.645044		0.537902	0.756277	0.707995		0.712232			0.683407	0.842654	0.82128	0.685881			0.667376	0.932126	0.709768	0.69489
		1.00803	0.774866		0.671562	1.33958	0.669557	0.972787	1.22173		1.02234	0.992402	0.806259	1.7423	1.04158	1.11089	0.968453	0.796245	0.919711	1.32133		0.871818	0.795521	1.05836	0.827429	0.601963	1.01353	0.697045		0.601253	0.694356	0.655539		0.604781			0.693909	0.769888	0.78437	0.721681			0.723988	0.840328	0.743154	0.825554
		0.976016	0.81328		0.696313	1.13685	0.849866	0.756146	0.742024		0.999808	1.21387	0.948264	1.5935	1.09471	0.976571	1.00724	0.79237	0.951763	1.07707		0.646703	0.749093	1.25778	0.886758	0.651002	1.0858	0.772154		0.773106	0.919373	0.650134		0.598534			0.713072	0.813518	0.844523	0.732508			0.824818	0.789164	0.754759	1.02667
		1.18271	0.855963		0.726095	0.877589	0.757041	1.04345	0.697073		0.951576	1.4587	0.876327	1.21514	1.01272	0.809139	0.832098	0.790026	0.936279	0.902852		0.564336	0.665934	1.33223	0.486185	0.684637	0.610635	0.738268		0.955606	0.821495	0.649193		0.646025			0.732083	0.97056	0.884153	0.661601			0.885885	0.775055	0.722517	1.21874
		1.17058	0.895617		0.756823	0.69777	0.74411	1.11093	0.765276		0.903567	1.58912	0.748753	0.963502	0.868698	0.592903	0.775479	0.77482	0.907157	0.794393		0.783697	0.645905	1.14206	0.511576	0.942768	0.612069	0.799887		0.894686	0.759554	0.615697		0.757816			0.771311	1.10527	0.87899	0.707118			0.823153	0.745508	0.709415	1.18863
		1.13167	1.11536		0.784779	0.637338	0.683814	0.911752	0.868495		0.880643	1.47195	0.637292	0.86886	0.668194	0.668275	0.732055	0.739255	1.31911	0.75861		0.991471	0.684396	0.852545	0.535459	0.714294	0.637059	0.94088		0.631012	0.730479	0.606227		0.949715			0.837593	1.12529	0.846217	0.679884			0.730471	0.72228	0.717881	1.13896
		1.24827	0.866164		0.801793	0.652064	0.628164	0.736799	0.992281		0.928861	1.11028	0.590035	0.908515	0.619357	0.684974	0.738312	0.702935	1.27497	0.796496		1.11533	0.75337	0.613835	0.546617	0.601671	0.662478	1.06637		0.585472	0.996362	0.761092		0.640573			0.909372	1.1273	0.837156	0.669718			0.702144	0.779161	0.703949	0.891912
		1.22703	0.741106		1.20792	0.692009	0.613397	1.08861	1.06659		1.08446	0.784669	0.601446	1.008	0.577762	0.691324	0.807181	0.631311	1.19634	0.853808		0.946561	0.890319	0.457177	0.550073	0.566907	0.670631	1.07218		0.7526	0.860381	1.07684		0.625471			0.918476	1.09403	0.780953	0.671652			0.747456	0.88648	0.719769	0.668328
			0.698433		0.981813	0.70423	0.660901	0.949332	0.76503		1.29661	0.628839	0.657524	1.12299	0.618156	0.831132	0.833696	0.631953	1.08525	1.46108		0.710473	0.572	0.894409	0.542604	0.566499	0.645223	0.933209		1.05638	0.779998	1.31744		0.663672			1.06224	1.07151	0.822936	0.683371			0.888119	1.01789	0.766606	0.601847
			0.7121		0.782259	0.66395	0.835788	0.986771	0.747899		1.35867	0.664648	0.780166	1.26083	0.714494	0.815773	0.855203	0.606338	0.969175	1.16833		0.541743	0.546989	0.893493	0.526771	0.584124	0.606046	0.750947		1.30681	0.740869	1.33919		0.739509			0.859303	1.06062	0.822187	0.718623			0.776484	1.10507	0.804343	0.688893
			0.738459		0.686628	0.613381	0.795692	0.78215	0.815584		1.37557	0.967409	0.975845	1.3714	0.961788	0.811722	0.774041	0.625165	0.892134	0.962161		0.713599	0.584863	0.951827	0.527588	0.607218	0.619868	0.627189		1.26064	0.739961	1.22878		0.873521			0.741321	0.997682	0.813538	0.747542			0.785704	1.09313	0.806024	0.755872
			0.753721		0.657757	0.611231	0.728391	1.1543	0.906842		1.33017	1.21567	0.970251	1.34597	0.684756	0.820263	0.683233	0.674595	0.874543	0.822982		0.900758	0.628703	0.96634	0.565515	0.64091	0.71516	0.602715		1.03218	1.13246	1.09927		0.642243			0.684048	0.880287	0.839863	0.736511			0.87122	0.961224	0.741633	0.745296
			0.766774		0.655783	0.675253	0.666742	1.09142	0.992719		1.25385	1.13149	0.805531	1.08983	0.550588	0.789321	0.617895	0.73575	0.895612	0.767356		0.920201	0.645522	0.911254	0.6575	0.708545	0.864992	0.655339		0.699929	0.896395	1.02092		0.659555			0.680244	0.816206	0.687184	0.719056			0.963486	0.833619	0.705059	0.827977
			0.785986		0.658186	0.762131	0.647107	0.920928	1.08204		1.15863	0.930977	0.640755	0.957896	0.564578	0.801114	0.649344	0.774277	0.898645	0.802248		0.783473	0.639581	0.887631	0.779868	0.728758	1.01172	0.740942		0.548679	0.782881	0.849325		0.72247			0.727188	0.862522	0.73708	0.707536			0.928148	0.796158	0.707935	0.948913
			0.822444		0.658444	0.81496	0.687956	0.708986	0.794578		1.11307	0.793721	0.564447	0.769735	0.7347	0.899902	0.699838	0.765074	0.87728	0.845474		0.605999	0.64316	1.01183	0.885644	0.8329	1.0889	0.75938		0.600699	0.723465	0.747608		0.82167			0.770815	1.00412	0.746636	0.692588			0.790172	0.796178	0.744892	1.0013
			0.881387		0.65882	0.815928	0.818864	0.487469	0.794399		1.01999	0.763921	0.602701	1.79601	1.01455	0.837584	0.773964	0.799193	0.853066	1.44656		0.723537	0.683472	1.23975	0.496837	0.647803	0.592097	0.725311		0.745138	0.707534	0.66215		0.691561			0.770914	1.05257	0.760459	0.655734			0.715753	0.781178	0.815424	1.11805
			0.971637		0.667657	0.792764	0.825907	1.17929	0.872913		1.27428	0.810403	0.732243	1.97356	1.24919	0.752381	0.809087	0.794739	1.36089	1.17368		0.729531	0.719662	1.3194	0.522158	0.569885	0.602191	0.765133		0.910275	0.738917	0.615243		0.707501			0.77145	1.06413	0.826875	0.674794			0.744637	0.740308	0.839864	1.04365
			0.763058		0.688367	0.796021	0.768679	1.09936	0.949749		1.32065	0.829593	0.953172	1.68914	1.26722	0.700225	0.793735	0.763688	1.2737	1.00095		0.655787	0.688985	1.12648	0.537126	0.557426	0.620712	0.877738		0.765257	1.02688	0.646577		0.772587			0.79959	1.07191	0.620623	0.712163			0.842596	0.71127	0.801803	0.86414
			0.697863		0.72317	0.86043	0.719442	0.937419	1.00542		1.32539	0.763408	1.02116	1.24041	1.05357	0.695602	0.789405	0.724757	1.16938	0.89421		0.871932	0.63299	0.797008	0.523371	0.572625	0.626457	1.02653		0.578627	1.03774	0.672997		0.766696			0.83686	1.04843	0.64967	0.757429			0.978218	0.740286	0.692964	0.684631
			0.712071		0.764435	1.44631	0.701928	0.749944	0.839247		1.3496	0.71579	0.739975	0.91879	0.772228	0.747976	0.828251	0.701747	1.04295	0.826242		0.869679	0.631658	0.598748	0.549518	0.601162	0.610545	1.03275		0.628411	1.10394	0.689988		0.773291			1.01661	1.04268	0.694436	0.775686			0.892891	0.794588	0.867352	0.631015
			0.713158		0.807331	1.43138	0.72501	0.550702	0.928485		0.641789	0.773673	0.656119	0.792904	0.591398	1.03755	0.909871	0.598794	0.939504	0.862694		0.809853	0.679604	0.411123	0.540137	0.64017	0.580718	1.03344		0.86951	1.18134	0.689609					0.812106	0.87316	0.780374	0.749981			0.925203	0.949279	0.741982	0.757504
			0.782482		0.829655	1.20007	0.803428	0.313965	0.996337		0.971703	0.924214	0.621537	0.812381	0.542357	1.2199	0.88837	0.615923	0.87688	0.857119		0.962616	0.756326	0.924023	0.514629	0.705432	0.601976	0.860106		1.16876	1.092	0.827147					0.704144	0.939258	0.576045	0.727145			1.00917	1.13998	0.631862	0.824827
			0.768798		1.16908	0.894194	0.970493	1.13485	1.01976		1.07391	1.12768	0.726698	0.88403	0.589324	1.06314	0.697656	0.655877	0.869107	1.32649		0.974175	0.908387	0.910605	0.494325	0.792105	0.694694	0.684268		1.30711	0.871106	1.0919					0.66664	0.981248		0.687344			1.03329	1.22059	0.787411	0.754663
			0.754854		0.920578	0.683907	0.788712	1.04415	0.9654		1.07634	1.34927	0.663087	0.958676	0.682786	0.845497	0.651993	0.705063	0.874301	1.1165		0.936112	0.627807	0.937715	0.514502	0.780165	0.841417	0.579452		1.20186	0.716703	1.27058					0.682169	0.965316		0.707697			0.91185	1.18009	0.945422	0.790832
			0.756093		0.745361	0.624508	0.750563	0.900841	1.02115		1.11679	1.55255	0.662143	1.0772	0.788641	0.740189	0.675747	0.741116	0.855076	1.01654		0.834753	0.555916	0.906636	0.597093	0.632504	0.992111	0.565392		0.936647	0.654361	1.16216					0.733538	0.927188		0.673626			0.774052	1.05394	0.842476	0.859608
			0.821914		0.667539	0.677115	0.732277	0.739499			1.18756	1.58467	0.797681	1.13016	1.00009	0.722205	0.717812	0.766034	0.825742	0.963654		1.04715	0.568897	0.828638	0.733979	0.578286	1.06886	0.612666		0.68035	0.666452	1.15395					0.779088	0.960484		0.688179			0.747568	0.944764	0.670104	0.925188
			0.898344		0.640768	0.739882	0.741868	0.567336			1.28658	1.32542	0.827789	1.25956	0.694567	0.709251	0.762202	0.752291	0.80835	0.931889		1.02929	0.603446	0.810057	0.861968	0.575031	0.569606	0.696666		0.575099	0.738473	1.04156					0.772583	0.974324		0.725602			0.828857	0.897695	0.585467	0.912835
			0.918037		0.644319	0.739781	0.788067	0.359671			1.30292	1.02996	0.677488	1.12661	0.549722	0.664563	0.785384	0.78791	0.821288	0.909901		1.0289	0.620307	0.963672	0.509155	0.596313	0.560821	0.661563		0.60918	1.02059	1.15462					0.74834	0.889355		0.764558			0.950291	0.853101	0.717818	0.916276
			0.735304		0.659537	0.674679	0.877703	1.03132			0.740878	0.752618	0.632127	0.932779	0.568766	0.620287	0.784484	0.768938	1.27063	0.861332		0.979113	0.608462	1.19716	0.529978	0.631138	0.576149	0.693529		0.722757	1.09245	0.904984					0.761191	0.959562		0.777159			1.06516	0.813869	0.89339	0.811585
			0.708548		0.671545	0.609968	1.03287	0.946599			1.04444	0.631749	0.65999	0.774185	0.775554	0.609138	0.775111	0.732957	1.13986	1.15838		0.871958	0.579419	1.24203	0.540989	0.690093	0.588144	0.785367		0.867516	1.12772	0.797459					0.792684	0.937867		0.753618			0.995708	0.754185	1.08998	0.701185
			0.764085		0.671977	0.615037	0.773033	0.835567			1.06964	0.676315	0.724623	0.740157	1.13427	0.661165	0.797811	0.705771	1.0352	1.02892		0.7465	0.585492	1.04807	0.546238	0.770657	0.585574	0.927924		1.06112	1.16284	0.720119					0.762557	0.825036		0.728647			1.02206	0.711361	0.784823	0.676324
			0.824945		0.672655	0.682687	0.741391	0.707578			1.0494	0.964271	0.808897	1.62959	1.43808	0.847972	0.884032	0.563256	0.95073	0.983488		1.16552	0.614219	0.791631	0.546426	0.892917	0.578806	1.05663		0.671799	1.13895	0.634888					0.677147	1.01075		0.726155			1.04723	0.724965	0.639736	0.789863
			0.825437		0.690627	0.768601	0.696977	0.5575			1.06866	0.961044	1.01507	1.9358	1.41023	0.926956	0.977226	0.60628	0.890576	0.95439		1.06957	0.622842	0.557971	0.532825	0.670929	0.614419	1.07368		0.544296	0.985618	0.602994					0.66788	1.02493		0.734928			0.993272	0.668941	0.595759	0.726665
			0.771016		0.728169	0.821683	0.731293	0.370694			1.11005	0.90427	0.780207	1.93851	1.06584	1.08419	0.898973	0.682089	0.865135	0.912842		1.04722	0.60646	0.889064	0.489599	0.627783	0.710189	0.954307		0.656718	0.775812	0.676773					0.684527	1.03586		0.734245			0.870782	0.803103	0.680689	0.735483
			0.719834		0.782313	0.83188	0.762532	0.899525			1.13801	0.852067	0.684501	1.62734	0.637193	0.952261	0.717489	0.739012	0.852146	0.875616		1.03233	0.614633	0.871686	0.468518	0.62232	0.847925	0.774862		0.941601	0.641566	0.767619					0.718667	1.00955		0.71804			0.800217	1.02258	0.83731	0.776976
			0.739395		0.842148	0.827651	0.818609	0.838976			1.1336	0.878468	0.667699	1.20562	0.50385	0.751941	0.670326	0.762647	0.820421	0.830555		0.975391	0.658874	0.87881	0.475858	0.64423	0.989526	0.627553		1.20882	0.605901	0.779075					0.748725	0.915343		0.715197			0.834412	1.20091	0.996206	0.814638
			0.829816		0.867711	0.849446	0.905839	0.768584			1.03372	0.981314	0.670326	0.859785	0.509848	0.646978	0.687759	0.767733	0.786533	0.968389		0.875484	0.733987	0.835145	0.547913	0.687732	0.514639	0.55058		1.245	0.650543	0.75736					0.743366	0.956725		0.733003			0.945659	1.26167	0.850419	0.819874
			0.939417		1.09926	0.932178	0.739936	0.66609			0.418552	1.05908	0.677066	0.707586	0.613241	0.628474	0.729671	0.759441	0.773558	0.899058		0.783205	0.58586	0.753325	0.694345	0.752097	0.533109	0.523466		1.05869	0.75576	0.831286					0.723636	0.957897		0.755823			1.048	1.22654	0.739298	0.792489
			0.924123		0.859386	1.5234	0.699767	0.530205			0.850335	1.04189	0.694135	0.707909	0.735079	0.625485	0.770871	0.771028	0.817077	0.879439		1.14845	0.538388	0.748201	0.547908	0.848177	0.560652	0.58158		0.821031	0.892545	0.990596					0.728777	1.04805		0.746098			1.15958	1.14296	0.629065	0.742966
			0.761962		0.720291	1.53548	0.686394	0.350766			1.18255	0.985999	0.743051	0.757138	0.819571	0.596587	0.784584	0.726826	1.18194	0.845041		1.07696	0.544274	0.907277	0.550697	0.779613	0.578478	0.660532		0.654748	0.981537	1.11203					0.755027	1.12055		0.720765			1.05525	1.08331	0.590085	0.703858
			0.759893		0.658079	1.29565	0.698664	0.736835			1.20642	0.995709	1.21699	0.805055	1.05075	0.557055	0.771815	0.69938	1.08098	0.783315		1.05045	0.57125	1.10012	0.549767	0.724124	0.609556	0.608918		0.592462	1.03782	1.11712					0.705655	1.00619		0.717446			1.01143	1.0129	0.653003	0.716148
			0.827627		0.641567	0.945588	0.727687	0.704903			1.17056	1.10428	0.897978	0.899541	0.715619	0.555122	0.75676	0.68983	0.999091	0.746835		1.01629	0.579649	1.0816	0.544936	0.705078	0.675044	0.6769		0.616403	1.0839	1.1201					0.693124	1.07621		0.734477			0.964269	0.898437	0.77844	0.807553
			0.878539		0.650991	0.696366	0.769319	0.633559			1.13849	1.28368	0.753612	0.989141	0.549195	0.604937	0.779285	0.549131	0.912961	0.73827		0.948389	0.541464	0.936687	0.525765	0.724351	0.776646	0.798307		0.695459	1.10235	1.00754					0.697963	1.12549		0.757713			0.894634	0.79737	0.888994	0.691887
			0.845425		0.673289	0.643514	0.824872	0.502893			1.09926	1.47416	0.743846	1.14137	0.53993	1.00335	0.846767	0.545036	0.852409	0.741452		0.858348	0.510463	0.720341	0.490504	0.77275	0.904709	0.948514		0.821922	1.02883	0.993547					0.703188	1.12696		0.743989			0.84537	0.743553	0.982792	0.68342
			0.75147		0.689112	0.726364	0.899063	0.657482			1.04652	1.58916	0.764593	1.06248	0.762546	0.895083	0.930963	0.703426	0.812246	0.728525		0.777801	0.516721	0.512488	0.454269	0.573068	1.03036	1.05431		0.974863	0.855861	0.826211					0.71256	1.06288		0.686602			0.864908	0.730217	0.770061	0.71256
			0.691326		0.685905	0.811576	0.642108	0.660166			0.992662	1.51228	0.740335	0.874141	1.20636	0.789053	0.919939	0.771985	0.770825	0.721224		1.23032	0.54778	0.790892	0.447232	0.639991	0.488567	1.02686		0.615558	0.684274	0.777298					0.714842	0.972891		0.688134			0.95692	0.608255	0.700863	0.738782
			0.722894		0.680982	0.806238	0.632608	0.620106			0.94219	1.23778	0.666839	0.797075	1.57545	0.743541	0.710677	0.786921	0.756828	0.689709		1.10041	0.574181	0.789438	0.511051	0.674589	0.544694	0.887833		0.526663	0.603662	0.722983					0.709423	0.954621		0.72497			1.0807	0.620352	0.624939	0.72204
			0.835534		0.692445	0.722981	0.649263	0.882347			0.53048	0.929159	0.618542	0.787985	1.48849	0.768142	0.651448	0.79254	0.771177	0.62691		1.07596	0.596638	0.750308	0.589659	0.651985	0.606733	0.723849		0.666717	0.617257	0.638533					0.710456	0.992477		0.73626			1.10253	0.816455	0.591995	0.691872
			0.979673		0.734436	0.643267	0.680998	0.79496			0.944822	0.72032	0.652894	1.62938	1.03373	0.865035	0.66497	0.787646	0.843996	0.580957		1.07435	0.635235	0.701454	0.571197	0.625855	0.688139	0.601768		0.946468	0.699182	0.611675					0.7741	1.07316		0.749921			1.05943	1.06351	0.630198	0.677142
			0.977578		0.799559	0.635695	0.719081	0.671231			1.32898	0.637062	0.713818	1.7839	0.590138	0.92198	0.715365	0.770082	1.18657	0.512468		1.03713	0.714194	0.717191	0.553236	0.677411	0.788247	0.529233		1.15947	0.930262	0.707628					0.739481	1.16269		0.702453			0.926124	1.22597	0.714062	0.695075
			0.816792		0.867414	0.6986	0.76238	0.51352			1.38185	0.69022	1.42958	1.68275	0.475149	0.826731	0.757823	0.71623	1.0789	0.533688		0.950471	0.533239	0.85054	0.537939	0.818204	0.902618	0.53759		1.11817	0.921005	0.807229					0.705312	1.07179		0.717679			0.846233	1.26963	0.805135	0.743286
			0.815667		1.01884	0.775953	0.829786	0.32193			1.33062	0.775428	1.0781	1.43902	0.504239	0.676453	0.757421	0.671826	0.94306	0.530369		0.843386	0.500898	0.976733	0.516667	0.788979	1.01481	0.57486		0.913566	0.938235	0.819593					0.694741	0.974791		0.755324			0.819324	1.22461	0.899757	0.82809
			0.871783		0.801883	0.830699	0.562199	0.983404			1.24221	0.841757	0.818396	1.09041	0.649681	0.60144	0.726911	0.676304	0.843057	0.481209		0.744823	0.530118	0.958483	0.484988	0.607259	0.541751	0.654453		0.721197	0.971014	0.770654					0.702165	1.03561		0.750504			0.854028	1.16793	0.704016	0.700172
			0.899996		0.695244	0.857847	0.574572	0.910712			1.11465	0.93033	0.757305	0.783003	0.766704	0.58774	0.711407	0.570897	0.77776	1.3592		1.11718	0.577227	0.824108	0.445098	0.583492	0.671104	0.594011		0.636966	0.980386	0.783867					0.713668	1.16358		0.677216			0.95253	1.02775	0.666182	0.661268
			0.83649		0.65719	0.883251	0.594594	0.821542			1.01137	0.959086	0.832259	0.642352	1.02172	0.585847	0.734193	0.621737	0.74786	1.28183		1.03096	0.550816	0.641964	0.420232	0.61179	0.810569	0.66793		0.605018	0.899483	0.931841					0.706261	1.22949		0.666203			1.08846	1.05293	0.616329	0.691416
			0.723736		0.657139	0.929862	0.625865	0.732621			0.939602	0.956492	0.902221	0.640085	0.734052	0.5595	0.793041	0.72379	0.748197	1.21232		1.06654	0.484076	0.459326	0.590047	0.649915	0.950497	0.79871		0.609908	0.723809	1.08523					0.840178	1.18356		0.690833			1.18826	0.895276	0.588286	0.699104
			0.666918		0.676328	1.41452	0.662839	0.645007			0.905348	1.00739	0.834993	0.668043	0.537425	0.526659	0.887532	0.797159	0.790899	1.17437		1.11971	0.448269	0.687613	0.542437	0.65726	1.0659	0.953334		0.657806	0.64279	1.13646					0.740604	1.06771		0.720728			1.03525	0.740941	0.610483	0.668813
			0.709334		0.698211	1.61139	0.700206	0.553936			0.893594	1.14448	0.679079	0.690909	0.50627	0.531584	0.94235	0.81934	0.903754	1.12317		1.10628	0.471885	0.685687	0.51622	0.638191	1.04111	1.0496		0.747696	0.628547	1.07982					0.695586	0.962624		0.714742			0.849146	0.671408	0.672839	0.640438
			0.83476		0.70631	1.63632	0.741378	0.430828			0.624865	1.28565	0.575931	0.767449	0.735655	0.591	0.682986	0.822331	1.31366	1.09223		0.988055	0.525353	0.66958	0.498454	0.61329	0.769988	0.960175		0.941555	0.698487	0.904581					0.702059	0.953037		0.701559			0.778431	0.664758	0.764713	0.653823
			1.00049		0.693565	1.40684	0.820649	0.979242			1.00579	1.32743	0.599742	0.909996	1.21155	0.697057	0.615345	0.818724	1.14456	1.08564		0.834707	0.576318	0.654304	0.476195	0.636483	0.96916	0.881935		0.596216	0.809163	0.798145					0.720457	0.999924		0.702893			0.795511	0.715751	0.874995	0.705419
			1.04372		0.684228	1.02309	0.50849	0.88938			1.40277	1.28957	0.711142	0.959109	1.57765	1.02008	0.625766	0.771489	0.963812	0.971451		0.69674	0.643199	0.695973	0.440272	0.715703	1.13193	0.727827		0.530069	0.95217	0.7899					0.968577	1.04221		0.745573			0.887884	0.573422	0.658211	0.777742
			0.86594		0.696942	0.732284	0.538545	0.817769			1.46051	1.26434	0.817257	0.978884	1.42218	0.939169	0.674918	0.70098	0.837815	0.985774		0.972396	0.748323	0.778813	0.507254	0.820507	1.22635	0.594049		0.655864	0.860242	0.737736					0.918071	1.06633		0.79007			1.02897	0.64796	0.664796	0.854525
			0.845353		0.740481	0.671687	0.571201	0.762947			1.40309	1.31031	1.44936	0.89761	0.934129	0.86323	0.705681	0.653954	0.762448	1.01939		0.949454	0.552223	0.865523	0.473338	0.717427	1.20047	0.551514		0.883063	0.820942	0.675463					0.893095	1.04718		0.692593			1.16221	0.859944	0.65328	0.684321
			0.876842		0.810596	0.764353	0.605248	0.727865			1.28881	1.41912	1.25328	0.837989	0.579556	0.789016	0.694709	0.67636	0.736206	0.850393		1.05107	0.6176	0.833698	0.46384	0.639517	1.11863	0.549572		1.02411	0.821617	0.631763					0.884377	0.963319		0.671456			0.840586	1.1052	0.624563	0.687882
			0.880964		0.875244	0.859845	0.63529	0.69576			1.12464	1.51784	0.94861	0.858106	0.49333	0.722545	0.665486	0.603115	0.772979	0.894466		1.18463	0.59395	0.722219	0.454916	0.647104	1.27336	0.593045		0.951009	0.826646	0.707057					1.08665	1.0634		0.677724			0.786791	1.25524	0.600774	0.677426
			0.808788		0.95073	0.859764	0.661142	0.625446			1.0069	1.50168	0.773225	1.3945	0.571474	0.694552	0.655864	0.647633	0.849989	0.970599		1.1964	0.485207	0.573455	0.421179	0.678216	1.31816	0.677888		0.78601	0.782308	0.796325					0.940166	1.23842		0.694889			0.82371	1.27652	0.611574	0.655627
			0.710087		0.750737	0.771396	0.710078	0.460169			0.939954	1.31957	0.7847	1.48068	0.696945	0.7096	0.682926	0.683578	1.20632	0.823629		1.03201	0.413858	0.572936	0.413432	0.691991	0.730866	0.598011		0.674947	0.706131	0.806132					0.850428	1.32206		0.699277			0.926796	1.22563	0.662954	0.655037
			0.667253		0.666847	0.680864	0.476919	0.940014			0.899027	0.995426	0.923594	1.44044	0.781686	0.745755	0.746583	0.818221	0.990033	0.931168		0.807365	0.424604	0.577781		0.661775	0.770954	0.657075		0.631718	0.671111	0.745413					0.838298	1.21139		0.689326			1.05182	1.13321	0.745649	0.694166
			0.71596		0.650881	0.66022	0.520929	0.85059			0.890904	0.826346	1.01164	1.34084	0.9249	0.743085	0.857906	0.847925	0.848169			0.63533	0.482445	0.604515		0.668566	0.77564	0.782197		0.610064	0.707366	0.719614					0.855813	1.03792		0.693692			1.10062	1.13366	0.850603	0.753293
			0.827785		0.671874	0.709584	0.557348	0.798425			0.605364	0.694311	0.905573	1.1645	0.695151	0.668669	0.658477	0.845167	0.770473			0.82981	0.56189	0.670258		0.659415	0.756417	0.942176		0.590416	0.809468	0.824223					0.868372	0.938859		0.727839			0.88152	1.01921	0.654446	0.819066
			0.991049		0.702218	0.779475	0.583461	0.776688			0.939353	0.654345	0.686714	0.913172	0.524769	0.597415	0.586947	0.814989	0.757507			0.875415	0.679508	0.749919		0.677372	0.765672	0.990058		0.543697	0.960349	0.972801					1.12725	0.936654		0.738987			0.853425	0.847753	0.639169	0.883729
			1.10743		0.717975	0.83595	0.601036	0.777536			1.35017	0.727618	0.551568	0.698994	0.506075	0.581225	0.598408	0.752408	0.809625			1.05117	0.657331	0.785081		0.717172	1.3616	1.03823		0.883046	0.799174	1.04294					0.940544	0.971649		0.695522			0.880763	0.661998	0.662284	0.701737
			0.899943		0.71172	0.885468	0.626806	0.77292			1.40419	0.69957	0.572512	0.61339	0.740751	0.593478	0.636537	0.689114	1.03739			1.24204	0.539862	0.740695		0.769913	1.38195	0.921915		0.606309	0.715156	0.89168					0.80835	0.965726		0.684871			0.917978	0.595552	0.645022	0.66835
			0.845695		0.694643	0.93806	0.531253	0.720737			1.34253	0.812658	0.685518	0.616213	1.15781	0.592583	0.658831	0.655099	0.873554			1.24425	0.442642	0.633754		0.831323	1.15547	0.767757		0.537592	0.689054	0.828792					0.777226	0.942032		0.68154			0.833999	0.670926	0.622041	0.684429
			0.848513		0.686223	1.48154	0.558869	0.573184			1.24899	0.942423	0.727	0.624671	1.33746	0.562277	0.645663	0.702478	0.781401			1.02826	0.418577	0.487483		0.833625	0.854214	0.63861		0.634971	0.695012	0.845679					0.805388	0.923064		0.683494			0.851714	0.65171	0.627954	0.742462
			0.835521		0.7009	1.68417	0.567871	0.893548			1.11524	1.00281	1.23697	0.622373	1.15142	0.529686	0.62238	0.619534	0.761255			0.758374	0.461097	0.536681		0.686275	0.686308	0.553014		0.775055	0.711544	0.833025					0.847353	0.930478		0.684254			0.8959	0.584647	0.66341	0.813337
			0.780315		0.744707	1.7219	0.57669	0.808146			1.00093	1.01336	1.02939	0.663173	0.793784	0.535003	0.616261	0.656373	0.802611			0.566296	0.546616	0.627927		0.679229	0.686217	0.571763		0.848234	0.724681	0.709925					0.860085	1.0499		0.696618			0.933154	0.708869	0.741484	0.857142
			0.712676		0.806146	1.51566	0.576137	0.776907			0.932048	1.07783	0.835243	0.739186	0.552721	0.58882	0.657425	0.735741	0.930687			0.836852	0.688291	0.71311		0.728651	0.726163	0.621629		0.783602	0.757988	0.641041					0.799676	0.97074		0.801432			0.825923	0.919417	0.823813	0.868572
			0.689951		0.908057	1.11401	0.586939	0.786112			0.878224	1.24263	0.757172	0.855923	0.528288	0.687677	0.743888	0.819395	0.793739			1.05231	0.649841	0.734307		0.77197	0.743843	0.711049		0.688593	0.821177	0.674716					0.732603	1.09715		0.738855			0.755889	1.14482	0.67492	0.651038
			0.731674		0.715833	0.787112	0.576319	0.807167			0.847824	1.43951	0.820964	0.878922	0.621337	1.10764	0.87687	0.853028	0.743404			1.24372	0.696991	0.678861		0.749232	0.753532	0.610192		0.638763	0.900406	0.738021					0.76467	1.29136		0.725793			0.793689	1.29314	0.683264	0.727761
			0.823955		0.639337	0.709478	0.650361	0.806424			0.844605	1.54942	0.967722	0.873558	0.734753	0.96609	0.716116	0.828644	1.16867			1.21086	0.690668	0.575654		0.76083	0.784685	0.645425		0.62557	0.707604	0.737968					0.820092	1.3697		0.722346			0.900006	1.31807	0.680435	0.87681
			0.971745		0.638487	0.79406	0.717551	0.751298			0.795706	1.55791	1.02776	0.886285	0.820634	0.845495	0.642056	0.77386	1.21831			0.980522	0.704312	0.673715		0.744564	1.29712	0.752077		0.607783	0.605102	0.670242					0.851799	1.20437		0.713917			1.1103	1.26826	0.658672	0.983372
			1.16327		0.670965	0.884414	0.547633	0.61443			1.20141	1.52594	0.887892	1.34763	0.633631	0.76596	0.637717	0.724089	0.953805			0.692185	0.711213	0.694802		0.74633	1.2574	0.858123		0.496427	0.571005	0.636259					0.719948	0.99787		0.70717			1.16376	1.19929	0.637901	0.945215
			0.925571		0.706714	0.882643	0.629391	0.320893			1.29807	1.50752	0.667378	1.23557	0.523751	0.714126	0.655862	0.698043	1.03639			0.514837	0.702276	1.67031		0.755408	1.03963	0.979353		0.653625	0.600067	0.965952					0.782976	0.914002		0.710725			1.19174	1.1101	0.645025	0.738764
			0.841523		0.71706	0.802381	0.687728	0.841861			1.21706	1.49519	0.539308	1.11694	0.554016	0.674307	0.672755	0.700751	1.08367			1.03994	0.742821	1.45426		0.760345	0.791356	1.04961		0.589592	0.687076	0.90784						0.856986		0.772693			0.950997	0.917189	0.689054	0.682716
			0.812841		0.704428	0.699811	0.722251	0.771238			1.16173	1.43012	0.563787	1.02113	0.768408	0.652951	0.659995	0.651389	1.11543			1.15937	0.666629	1.16405		0.768707	0.658927	0.949369		0.608814	0.787549	0.928521						0.90954		0.810884			0.75432	0.760352	0.744559	0.841082
			0.79238		0.68651	0.659968	0.736001	0.770472			1.08737	1.28019	0.672515	0.904868	1.05639	0.649254	0.633142	0.726973	1.12437			1.08687	0.689859	1.45858		0.792997	0.655736	0.792806		0.658316	0.867306	0.923047						0.86552		0.841309			0.682904	0.591176	0.797917	0.650344
			0.761126		0.686768	0.696312	0.59844	0.80029			0.992717	1.02165	0.731162	0.75831	1.14399	0.638418	0.638315	0.806789	0.868445			0.866861	0.733376	1.16636		0.850925	0.691199	0.623149		0.682108	0.928965	0.795507						0.836955		0.822139			0.725531	0.544879	0.684399	0.62722
			0.731353		0.710377	0.767378	0.672088	0.824697			0.907651	0.826384	0.805502	0.648969	0.936373	0.599423	0.697626	0.830791	0.919489			0.629682	0.726858	0.943046		0.739592	0.712778	0.588317		0.655555	0.7174	0.615536						0.847872		0.770988			0.876251	0.646287	0.691801	0.704368
			0.722633		0.750103	0.841681	0.72108	0.810988			0.839035	0.738892	1.02334	0.625671	0.668976	0.541542	0.802451	0.782881	0.956818			0.96554	0.662941	0.848075		0.676429	0.728936	0.590807		0.615834	0.865267	1.02959						0.907864		0.733256			1.28092	0.603823	0.684942	0.804657
			0.751182		0.773618	1.5299	0.743279	0.742983			0.800809	0.682084	0.833182	0.637719	0.541171	0.532381	0.940677	0.722301	1.00915			0.99494	0.610446	0.88992		0.736058	0.780106	0.648768		0.60078	0.967218	1.0272						1.00647		0.95314			1.25078	0.600003	0.659304	1.02469
			0.825083		0.887992	1.72531	0.739748	0.602117			0.80542	0.692129	0.737173	0.62642	0.56203	0.57729	0.784376	0.707943	1.06788			0.925965	0.969466	0.957732		0.83427	0.863528	0.73651		0.597072	0.892298	1.01001						0.982095		1.04802			1.09401	0.756227	0.641746	0.736514
			0.948659		0.693155	1.77874	0.688744	0.80842			0.826009	0.908178	0.74324	0.594567	0.657957	0.634046	0.73583	0.744578	1.07771			0.7518	0.819362	1.49809		0.907341	1.12328	0.616645		0.517288	0.815909	1.03485						1.11067		1.01229			0.87211	0.979726	0.660772	0.614205
			0.97623		0.6151	1.61078	0.640968	0.753203			0.598835	0.665925	0.836076	0.595443	0.736102	0.642625	0.736711	0.805597	0.851096			0.792651	0.690736	1.17306		0.915067	1.06766	0.600673		0.754186	0.750819	0.742543						1.27657		0.890275			0.692666	1.19565	0.711517	0.619761
			0.860446		0.618935	1.22068	0.705157	0.776033			1.02206	0.680753	0.938643	0.656126	0.984005	0.599315	0.751308	0.652017	0.813812			0.754745	0.652513	0.955559		0.881584	0.864417	0.70911		0.643333	0.981844	0.75687						1.31825		1.1421			0.600669	1.33651	0.764282	0.573743
			0.801404		0.656361	0.860783	0.74326	0.815752			1.19578	0.803694	0.936594	0.730225	0.752595	0.553722	0.73597	0.726261	0.837735				0.694608	0.826388		0.857433	0.7231	0.796592		0.590553	0.860254	0.797063						1.15878		1.28733			0.663625	1.36513	0.801627	0.779042
			0.76765		0.688871	0.745615	0.758808	0.830376			1.12455	0.927079	0.798952	0.784099	0.585572	0.546734	0.699254	0.802719	0.893331				0.735336	0.779452		0.851309	0.635909	0.968242		0.56672	0.796508	0.756593						0.972598		1.24612			0.834519	1.3171	0.651755	0.887489
			0.754013		0.693803	0.797713	0.747706	0.745767			1.07834	0.96994	0.623444	0.842036	0.530006	0.590714	0.704345	0.806806	0.967818				0.708985	0.80668		0.8364	0.636077	0.937742		0.564648	0.772471	0.704004						0.8542		1.05136			1.48282	1.1435	0.679363	0.704872
			0.752165		0.680348	0.863309	0.708076	0.703414			1.04672	0.978584	0.52964	0.94085	0.597165	0.687891	0.776398	0.735866	1.05195				0.630601	0.848391		0.807017	0.662514	0.908799		0.566265	1.02465	0.719081						0.897717		1.50124			1.33794	1.07623	0.684029	0.652817
			0.751929		0.672036	0.854621	0.671691	0.541965			0.999063	1.06205	0.556155	1.22562	0.779255	1.07298	0.903286	0.683538	0.758137				0.57075	0.868891		0.78406	0.679214	0.766032		0.564196	1.0809	0.783987						0.857346		1.44903			1.16684	0.904485	0.670363	0.632236
			0.773667		0.684112	1.27076	0.704817	0.802545			0.921433	1.25727	0.670969	1.04069	0.916686	0.885829	0.821645	0.716537	0.748629				0.565704	0.88452		0.789638	0.705553	0.645311		0.543038	1.02694	0.784297						0.794818		1.62617			0.975334	0.70319	0.66582	0.631421
			0.829391		0.715703	1.56482	0.75873	0.749473			0.852805	1.4963	0.773642	0.895897	0.887075	0.777765	0.83731	0.838688	0.791774				1.11676	1.19074		0.842119	0.769386	0.59295		0.892729	0.906642	0.748821						0.785444		0.785043			0.781879	0.546176	0.6954	0.619465
			0.92816		0.745774	1.75097	0.736797	0.781801			0.795961	1.66218	0.798311	0.816083	0.727302	0.719489	0.870155	0.747364	0.875386				0.881699	0.948578		0.863485	0.852783	0.606357		0.704596	0.820312	0.768832						0.826233		0.772481			0.63431	0.529822	0.744022	0.834162
			1.0796		0.885378	1.80072	0.749956	0.822019			0.781079	1.72911	1.13776	0.757208	0.583847	0.682865	0.853624	0.783565	0.995134				0.735131	0.835938		0.676994	0.905479	0.667507		0.577085	0.783621	0.742257						0.903553		0.715768			0.574903	0.654211	0.796804	1.12885
			0.930404		0.686313	1.66309	0.722707	0.824519			0.794873	1.67758	0.87672	0.702998	0.539971	0.637331	0.816828	0.789357	0.693985				0.659406	0.768385		0.687315	0.865836	0.756972		0.493469	0.784969	0.687683						0.965087		0.734687			0.631865	0.845504	0.825639	0.786585
			0.827104		0.599189	1.32432	0.696142	0.765818			0.822974	1.65773	0.704422	0.678636	0.583698	0.608776	0.804873	0.714419	0.725203				0.661572	0.739821		0.813764	0.745181	0.619954		0.472809	0.868847	0.698422						0.939554		0.738376			0.789007	0.574433	0.658505	0.730333
			0.738122		0.603816	1.5698	0.746231	0.638102			0.537923	1.48449	0.661698	0.6911	0.662822	0.601361	0.853574	0.671012	0.792477				0.714076	0.753592		0.972262	0.670561	0.612852		0.500598	0.858827	0.76041						0.970741		0.637889			1.58575	0.606579	0.689413	0.736598
			0.751148		0.638981	1.72933	0.764125	0.84641			0.845722	1.23916	0.71569	0.698242	1.04045	0.58578	0.848173	0.747977	0.915725				0.742186	0.766912		1.07831	0.627733	0.659767		0.505221	0.880682	0.85581						1.07623		0.566289			1.28797	0.775553	0.697604	0.662632
			0.761141		0.661785	1.7686	0.757766	0.753422			1.09566	0.998027	0.80997	0.669725	0.719127	0.540637	0.897689	0.94783	0.651971				0.70536	0.828259		1.07847	0.630978	0.713181		0.781273	0.906692	0.884634						1.17332		0.574851			1.0237	1.01217	0.708115	0.580406
			0.773913		0.664226	1.5512	0.722019	0.771954			1.09979	0.785803	0.856672	0.60997	0.561794	0.501013	0.906778	0.785969	0.711313				0.638868	0.869532		1.0219	0.641928	0.848205		0.566958	0.881562	0.762669						1.17706		0.672739			0.829095	1.22397	0.733133	0.617182
			0.796475		0.649681	1.66292	0.720461	0.807884			1.04424	0.724203	0.809704	0.571045	0.537238	0.518152	0.860662	0.819512	1.22034				0.592881	0.925438		0.969468	0.649963	0.871119		0.423901	0.827562	0.696862						1.06296		0.803149			0.67836	1.34217	0.774982	0.741164
			0.838153		0.642878	1.52888	0.755925	0.804672			1.03242	0.690673	0.695974	0.596152	0.585312	0.60173	0.816135	0.781738	1.13601				0.590703	0.913475		0.932483	0.670551	0.805273		0.366409	0.790399	0.705585						0.935599		0.683837			0.580724	1.36297	0.820706	0.970982
			0.904887		0.66423	1.54063	0.766833	0.728929			1.03382	0.707298	0.573316	0.655794	0.73127	0.698686	0.706656	0.705764	1.20637				0.595113	0.817172		0.88708	0.759704	0.697222		0.930752	0.782495	0.805147						0.888043		0.686318			0.56316	1.31072	0.844006	0.747316
			1.03872		0.910264	1.53814	0.748762	0.551788			1.00924	0.877881	0.514324	0.726975	0.772619	0.717694	0.6707	0.672644	1.20385				1.28394	0.782469		0.839527	0.846549	0.614554		0.704376	0.800623	0.883309						0.894061		0.702532			0.624511	1.17595	0.66414	0.780005
			0.884178		0.689855	0.951461	0.725188	0.768721			0.94262	0.655445	0.55772	0.818058	0.708936	0.650462	0.947513	0.739547	1.03678				0.972105	0.756276		0.804415	0.723532	0.58874		0.60566	0.98043	0.788503						0.854383		0.658546			0.738873	1.03102	0.704309	0.806855
			0.781023		0.600417	0.99817	0.701956	0.738062			0.855964	0.67211	0.668248	0.976367	0.606183	0.580206	0.793034	0.76072	1.1005				0.789614	0.735202		0.80462	0.706818	0.61056		0.997347	0.902129	0.701048						0.808503		0.593624			1.52656	0.87011	0.723187	0.688808
			0.744697		0.602494	1.09585	0.679396	0.759493			0.78059	0.734025	0.778215	1.12444	0.543363	0.563498	0.732987	0.726527	1.14843				0.68359	0.744731		0.751345	0.6646	0.673152		0.795841	0.812163	0.678971						0.820271		0.613145			1.15208	0.681821	0.734158	0.558214
			0.757823		0.631577	1.23342	0.761694	0.754622			0.766064	0.797183	0.822717	0.93599	0.536658	0.606948	0.723692	0.730177	0.931195				0.657164	0.785872		0.642736	0.630371	0.751943		0.630191	0.754044	0.72835						0.870913		0.680874			0.86559	0.546605	0.751318	0.579008
			0.786944		0.645221	1.3711	0.771226	0.678529			0.80316	0.852785	1.10366	0.799826	0.573977	1.1783	0.705389	0.746623	0.976394				0.687217	0.827297		0.721865	0.625717	0.611522		0.603063	0.74315	0.842423						0.930081		0.763041			0.686862	0.55104	0.780609	0.654032
			0.821432		0.629911	1.47975	0.730493	1.01855			0.870754	0.891402	0.812654	0.744146	1.0268	0.995978	0.930684	0.738072	1.05468				0.741717	0.858999		0.912756	0.631024	0.595028		0.703535	0.75385	1.03837						0.96738		0.714318			0.58412	0.698394	0.815111	0.837174
			0.855202		0.594244	1.55903	0.710986	0.920941			0.572203	1.03959	0.645724	0.734473	0.708521	0.814935	0.777859	0.733379	0.826226				0.768293	0.889077		1.12955	0.62541	0.593384		0.964675	0.759127	0.891848						0.812937		0.673707			0.557523	0.892805	0.828625	0.890152
			1.09911		0.588642	1.47946	0.682241	0.785293			0.746176	1.28162	0.614067	0.75184	0.555514	0.721985	0.740815	0.716007	0.85818				0.751378	0.997389		1.24703	0.637958	0.666469		0.841066	0.755153	0.763169						0.920409		0.681412			0.591714	0.573389	0.70839	0.764593
			0.942514		0.621156	1.58685	0.67344	0.99449			1.01037	1.52735	0.677965	0.757987	0.50982	0.687071	0.753895	0.687624	0.964501				0.704612	0.789557		1.22307	0.674075	0.718849		0.713334	0.7658	0.672662						0.993517		0.695686			0.647681	0.60582	0.709462	0.815863
			0.800697		0.626718	0.93813	0.775599	0.925409			1.10421	1.63875	0.762247	0.814604	0.589594	0.665725	0.742733	0.663889					0.666208	0.733912		1.12757	0.753611	0.696849		0.629253	0.789819	0.680786						1.02266		0.671238			0.709715	0.763196	0.705753	0.82768
			0.73658		0.641596	0.841786	0.749603	0.847899			1.07756	1.81359	0.778288	0.807393	0.649419	0.635707	0.690064	0.74502					0.644616	0.770538		1.03327	0.851216	0.686573		0.639185	0.742265	0.817364						0.989071		0.639977			0.756124	0.977617	0.708669	0.694746
			0.743794		0.635206	0.820174	0.710477	0.771895			1.07075	1.83639	0.71738	0.751481	0.654343	0.60651	1.08953	0.751101					0.623611	0.776601		0.957733	0.62246	0.624183		0.732249	1.06269	0.946798						0.927535		0.630421			1.35933	1.17642	0.72189	0.576605
			0.79234		0.600444	0.850349	0.678011	0.685278			1.09963	1.69842	0.627631	0.663157	0.60811	0.604214	0.917961	0.771019					1.44931	0.783011		0.870363	0.618226	0.581773		0.861624	0.924321	0.881844						0.86871		0.696951			0.989885	1.26883	0.744235	0.610501
			0.84331		0.921397	0.937766	0.663128	0.96731			1.10215	1.37954	0.545186	0.60184	0.552246	0.616651	0.780814	0.768187					1.11494	0.810879		0.850597	0.604656	0.577442		1.06998	0.786877	0.741496						0.873865		0.753205			0.74161	1.27609	0.772053	0.696661
			0.866814		0.843483	1.08614	0.670396	0.919635			1.04539	1.01515	0.503338	0.602133	0.51826	0.605248	0.746665	0.836891					0.861896	0.844941		0.825711	0.602623	0.612978		0.900234	0.683773	0.664785						0.903453		0.804642			0.598435	1.22641	0.769996	0.844997
			1.20354		0.823469	1.26479	0.75874	0.856068			0.936926	0.755787	0.548917	0.651206	0.500774	0.579736	0.763023	0.582728					0.719922	0.854892		0.830214	0.615976	0.670922		0.790331	0.640041	0.691602						0.89724		0.731356			0.546566	1.10579	0.686402	1.05569
			0.977192		0.825916	1.42573	0.749718	0.804545			0.833754	0.643525	0.657195	0.729534	1.00222	0.589817	0.754645	0.612282					0.66218	0.842513		0.937044	0.632457	0.592771		0.72656	0.653171	0.821443						0.887494		0.729344			0.574022	0.970349	0.647313	0.868878
			0.81113		0.840716	1.45606	0.720929	0.761478			0.779773	0.646908	0.774595	0.846086	0.709552	0.663012	0.696339	0.712726					0.673599	0.826105		0.673685	0.63773	0.603283		0.68681	0.678473	1.14421						0.905659		0.729816			0.634971	0.842194	0.639027	0.806182
			0.725945		0.876387	1.51088	0.697048	0.715757			0.792738	0.704828	0.844421	1.20365	0.578996	0.753025	1.05402	0.763026					0.720093	0.900075		0.62966	0.643733	0.624223		0.673005	0.705979	1.00561						0.929887		0.720039			0.681557	0.694563	0.649359	0.820718
			0.726823		0.910233	1.67814	0.678935	0.617989			0.834867	0.912234	1.13086	1.07699	0.543832	0.757053	0.92098	0.797146					0.774368	0.755962		0.765739	0.680877	0.639193		0.696296	0.745042	0.904954						0.936358		0.701051			0.708808	0.579639	0.665033	0.800329
			0.785734		0.916352	1.70131	0.671228	0.916021			0.891239	0.686977	0.819803	0.915238	0.55741	0.671866	0.793117	0.812631					0.818832	0.746241		1.01501	0.755397	0.633139		0.756823	0.795027	0.790527						0.933776		0.679727			0.732472	0.599645	0.677346	0.692776
			0.851755		1.00915	1.70222	0.721066	0.854398			0.551477	0.663121	0.639679	0.80444	0.576075	0.598225	0.753425	0.811405					0.759854	0.77783		1.26226	0.856238	0.608067		0.859708	1.11922	0.689092						0.885987		0.684808			1.15942	0.729243	0.598756	0.620853
			1.18639		0.875659	1.07535	0.744197	0.808404			0.721712	0.68365	0.590259	0.782896	0.576244	0.582163	0.767779	1.19058					0.806713	0.835112		1.36369	0.592928	0.575822		0.982451	0.949103	0.699595						0.900587		0.713492			0.845339	0.917949	0.532421	0.663501
			0.97502		0.811801	0.920452	0.739999	0.777401			0.9976	0.69368	0.641152	0.813132	0.551889	0.639099	0.757916	0.802996					0.746646	0.905964		1.29072	0.584847	0.558281		1.09117	0.775781	0.863031						0.891193		0.754845			0.66823	0.627355	0.523888	0.767709
			0.808674		0.781491	0.809908	0.72295	0.755659			1.13278	0.720924	0.709075	0.875297	0.520648	1.09216	0.705838	0.631274					0.686875	0.956778		1.14549	0.577747	0.571064		0.885981	0.639157	1.02691						0.864617		0.784554			0.57878	0.606512	0.533162	0.866311
			0.71659		0.764671	0.760944	0.708538	0.712021			1.12445	0.844514	0.74004	0.946887	0.475258	0.899169	1.04716	0.6237					0.625396	0.95488		1.01843	0.582459	0.605271		0.745986	0.586227	0.981768						0.833312		0.737345			0.563233	0.717005	0.53892	1.07779
			0.702455		0.768624	0.760939	0.687207	0.610459			1.10743	1.08464	0.685451	0.988374	0.716624	0.76059	0.935265	0.706668					0.566666	0.883964		0.936047	0.601641	0.637863		0.689943	0.613633	0.797252						0.812868		0.758207			0.612974	0.866976	0.356136	0.832228
			0.752952		0.798474	0.779	0.665197	0.399079			1.11709	1.36788	0.604461	0.966873	0.602713	0.685178	0.822545	0.802003					1.24471	0.794557		0.886623	0.62445	0.666622		0.691803	0.653334	0.669862						0.839139		0.772417			0.668589	1.01921	0.356206	0.797609
			0.933762		0.857641	0.862309	0.747791	0.85808			1.11005	1.5946	0.534353	0.874585	0.562799	0.662374	0.76511	0.862578					0.958752	0.732298		0.831884	0.639842	0.663573		0.719825	0.688215	0.672824						0.906987		0.767138			0.699606	1.11006	0.361421	0.830377
			0.794906		0.911605	0.998399	0.755183	0.80234			1.06408	1.73189	0.506266	0.752521	0.550141	0.673597	0.775619	0.875983					0.771344	0.85131		0.819628	0.657194	0.641318		0.733849	0.725967	0.812265						0.94293		0.74802			0.728992	1.15734	0.778069	0.804696
			0.696129		0.93381	1.17997	0.752068	0.780453			0.985748	1.75594	0.54273	0.631291	0.539604	0.67032	0.784583	0.874907					0.680446	0.755313		0.821656	0.694926	0.606209		0.73858	1.12926	1.04625						0.952803		0.72046			0.767911	1.13959	0.825197	0.751346
			1.0779		0.909187	1.37032	0.735004	0.770839			0.904422	1.79919	0.634745	0.649854	0.526172	0.668327	0.749771	0.903072					0.657694	0.750529		0.61671	0.767401	0.571459		0.76291	0.952195	0.970019						0.955944		0.700263			0.995578	1.03137	0.939827	0.688014
			0.952049		1.2563	1.52576	0.713084	0.748672			0.836142	1.58651	0.743484	0.690054	0.510596	0.69522	1.06618	1.40672					0.691826	0.811369		0.630605	0.574574	0.555738		0.828206	0.76066	0.933401						0.946315		0.71446			0.74365	0.892232	0.733233	0.668221
			0.911599		1.05785	1.638	0.687696	0.687974			0.801169	1.20918	0.834468	0.786218	0.472508	0.748127	1.02421	1.02238					0.739009	0.942799		0.804436	0.574178	0.55089		0.899143	0.617379	0.855848						0.918078		0.749646			0.627026	0.784478	0.738748	0.710176
			0.942356		0.903715	1.71297	0.762373	0.569449			0.800743	0.843846	0.841712	0.931547	0.741242	0.771442	0.85069	0.733469					0.795014	1.09523		1.0729	0.568594	0.840611		0.926404	0.581637	0.754474						0.888792		0.771324			0.587758	0.699292	0.787709	0.783421
			1.09882		0.822515	1.77332	0.779889	0.34295			0.831885	0.620221	0.879653	1.14827	0.631432	0.750442	0.781106	0.605092					0.866425	1.15611		1.30887	0.575119	0.801226		0.735563	0.627848	0.753397						0.901087		0.710777			0.605893	0.637745	0.897863	0.863146
			0.911956		0.778914	1.81661	0.770866	0.978377			0.874152	0.567154	0.665969	1.04728	0.59142	0.72992	0.791898	0.614326					0.848127	1.06939		1.36214	0.594288	0.722281		0.661115	0.686456	0.905047						0.861299		0.731762			0.645282	0.649879	0.701081	0.916504
			0.813055		0.742665	1.73177	0.757196	0.804572			0.69041	0.660293	0.582073	0.926755	0.566878	0.735166	0.823299	0.724498					0.896584	0.890708		1.2422	0.616854	0.639088		0.679613	0.713725	1.07242						0.82249		0.768035			0.671536	0.730903	0.722899	0.771782
			0.788638		0.710514	1.00093	0.736679	0.75889			1.03164	0.798977	0.616211	0.87709	0.526329	0.753813	0.809947	0.86602					0.803819	0.727661		1.07723	0.636446	0.580954		0.746922	0.706124	1.04377						0.802143		0.797606			0.692263	0.891952	0.78669	0.831843
			0.831183		0.702419	0.896455	0.714431	0.762357			1.13643	0.99862	0.708266	0.902414	0.480519	0.725168	1.01345	0.959045					0.693751	0.637445		0.95899	0.659644	0.559312		0.801024	1.0323	0.853409						0.795222		0.790736			0.745809	0.635337	0.890641	0.819417
			0.911011		0.728811	0.801411	0.701483	0.762576			1.07989	0.75746	0.746636	0.971374	0.788284	0.654926	0.882411	0.963637					0.604242	0.815503		0.900766	0.709882	1.10805		0.794818	0.899589	0.704726						0.820225		0.750316			0.8294	0.663181	0.982487	0.781483
			1.19489		0.794849	0.740896	0.799006	0.729323			1.03617	0.663734	0.697726	1.05323	0.679612	0.612453	0.809732	0.922023					0.552896	0.752057		0.882165	0.782031	1.0107		0.749976	0.721349	0.699316						0.896446		0.715235			0.910869	0.718197	0.670162	0.738136
			0.939491		0.876846	0.726348	0.7928	0.648119			1.02024	0.609392	0.608027	1.13133	0.639311	0.62225	0.80997	0.913428					1.10028	0.774535		0.886766	0.556235	0.86666		0.734537	0.60852	0.844275						0.959151		0.726689			0.681524	0.81434	0.722589	0.709327
			0.78598		0.953457	0.742599	0.77453	0.507542			1.01105	0.582283	0.538163	1.18395	0.595491	0.692693	0.852671	1.15803					0.850987	0.834696		0.899217	0.563375	0.715082		0.763773	0.606311	1.10048						0.969869		0.77104			0.598438	0.934754	0.795441	0.703321
			0.719865		0.981068	0.751176	0.754024	0.928815			1.00727	0.646543	0.519325	1.16538	0.504969	0.965951	0.851521	0.844383					0.703886	1.05823		0.721873	0.584511	1.32609		0.804393	0.67929	0.894322						0.958084		0.800648			0.588629	1.04401	0.891196	0.715401
			0.719193		1.10639	0.826797	0.731701	0.755254			0.998533	0.859516	0.553209	1.03574	0.74471	0.800868	1.05256	0.655905					0.649604	1.31186		0.59036	0.609656	1.21428		0.799732	0.751213	0.924232						0.918663		0.669378			0.625314	1.01873	0.953977	0.748646
			0.755803		0.919276	0.935977	0.711197	0.72373			0.971044	1.17705	0.611615	0.865316	0.707437	0.713338	0.937482	0.587856					0.660112	1.28867		0.633009	0.62706	1.03017		1.0877	0.765334	0.947882						0.885283		0.680484			0.651715	0.970239	0.643279	0.81098
			0.817724		0.820942	1.10416	0.811241	0.739463			0.913382	1.46927	0.687855	0.710903	0.732643	0.664041	0.855847	0.636001					0.706609	1.08594		0.803151	0.642317	1.23586		0.790343	0.605004	0.926115						0.862132		0.73818			0.652549	0.827577	0.713265	0.864753
			0.873564		0.780821	1.29848	0.794317	0.741554			0.852225	1.54808	0.782971	0.707524	0.856735	0.665058	0.842004	0.785334					0.741973	0.827234		1.04328	0.667035	1.27978		0.638624	0.647743	0.839816						0.881129		0.794453			0.667208	0.741051	0.796605	0.79471
			1.32855		0.752487	1.47378	0.767069	0.695619			0.810004	1.62028	0.850836	0.746	0.662613	0.707759	0.860797	0.960863					0.79733	0.655306		1.21898	0.720504	1.22552		0.634557	0.730295	0.811525						0.949194		0.795615			0.731548	0.724699	0.884613	0.786503
			1.0416		0.715116	1.60641	0.734479	0.593565			0.801025	1.68874	0.983022	0.88232	0.637075	0.763231	1.03051	1.07063					0.886071	0.551918		1.21956	0.811541	1.31039		0.734925	0.800452	0.920062						0.855393		0.757854			0.886265	0.708223	0.938592	0.779112
			0.835052		0.675027	1.71247	0.706856	0.432035			0.801662	1.5997	0.701691	1.12342	0.690229	0.802732	0.93349	1.04938					0.956181	0.78509		1.09674	0.525274	1.33838		0.856286	0.84418	1.0705						0.817614		0.73727			0.664136	0.715419	0.612162	0.762246
			0.724571		0.657398	1.80484	0.679059	0.891171			0.706821	1.35595	0.586496	1.01707	0.888257	0.850164	0.687822	0.951256					0.92999	0.755888		0.969525	0.555425	1.28604		0.903485	0.785072	1.06218						0.849002		0.767498			0.582939	0.756719	0.694979	0.755668
			0.688148		0.682776	1.8584	0.811023	0.716817			1.05226	1.02506	0.606286	0.937578	1.14465	0.930634	0.639602	0.869032					0.813895	0.772167		0.897607	0.604408	1.12722		0.834264	0.729645	0.890617						0.885574		0.815491			0.572821	0.87447	0.788629	0.747882
			0.693585		0.75041	1.78866	0.770993	0.685442			1.07862	0.740902	0.708378	0.961246	0.849306	0.990849	0.646272	0.997067					0.681467	1.02017		0.876435	0.646822	0.900244		0.724093	0.71386	0.759264						0.934199		0.849447			0.60424	0.710656	0.877257	0.729488
			0.720523		0.848486	1.47101	0.729199	0.703186			0.980796	0.588117	0.774291	1.05657	0.742308	0.963464	0.760748	0.725991					0.58974	1.23321		0.894149	0.664969	0.710075		0.667707	0.739796	0.769099						0.970755		0.701168			0.623632	0.637991	0.932954	0.705552
			0.755085		0.946798	0.993124	0.697638	0.699104			0.91338	0.597848	0.728045	1.16586	0.636203	0.873314	0.693398	0.597403					0.557101	1.50945		0.931518	0.6714	0.616815		0.682062	0.775995	0.928929						0.965774		0.643331			0.623946	0.619007	0.664739	0.699671
			0.80742		1.01235	0.888535	0.669436	0.643283			0.884511	0.776814	0.619081	1.24809	0.537179	0.767951	0.649659	0.586298					1.02611	1.44467		0.665442	0.693479	0.626077		0.719857	0.782343	0.901599						0.940282		0.660503			0.640942	0.664035	0.774941	0.841879
			1.14318		1.00533	0.798194	0.769772	0.527121			0.906703	1.1173	0.541533	1.312	0.635761	0.684766	0.613399	0.629023					0.791295	1.15903		0.575054	0.751983	0.685854		0.732666	0.868746	0.772247						0.895608		0.717712			0.703568	0.797606	0.875824	0.770665
			0.918197		1.16553	0.738495	0.722921	0.338511			0.965059	0.863572	0.531823	1.37152	0.789751	0.640386	0.618636	0.817222					0.663797	0.837966		0.625218	0.624034	0.712083		0.964354	0.823285	0.862377						0.866553		0.760285			0.90092	0.949544	0.941759	0.746664
			0.783203		0.965643	0.711227	0.691952	0.696679			1.02132	0.695401	0.563285	1.3438	0.983038	0.626392	0.705091	1.07212					0.626387	0.613386		0.757654	0.6965	0.698827		0.652143	0.870484	0.935751						0.866528		0.766166			0.677558	0.998982	0.639193	0.741075
			0.736412		0.820236	0.724191	0.67376	0.646628			1.03567	0.599192	0.593976	1.17963	1.12494	0.642047	0.81455	1.17181					0.656029	0.507914		0.924622	0.729117	0.682299		0.585626	0.845154	0.949207						0.89554		0.757506			0.560936	0.918414	0.771214	0.749185
			0.736816		0.76528	0.749645	0.669759	0.651059			1.00116	0.569766	0.636668	0.976683	1.12308	0.683788	0.6948	1.11997					0.703236	0.78597		1.0277	0.739723	1.11071		0.645614	0.789123	0.875486						0.968461		0.762916			0.565731	0.782191	0.88193	0.771213
			0.737039		0.751264	0.773935	0.747357	0.635891			0.940444	0.658135	0.722149	0.827708	0.84946	0.76155	0.65121	0.975328					0.730171	0.775584		1.00787	0.763323	1.22123		0.810022	0.737032	0.828191						0.892784		0.7991			0.571004	0.710234	0.947523	0.778864
			0.729192		0.732207	0.775298	0.724521	0.573854			0.8745	0.899291	0.79878	0.769671	0.743626	1.10145	0.628778	0.855409					0.784015	0.895676		0.9327	0.807487	1.25686		0.963588	0.712741	0.910099						0.865444		0.836069			0.58701	0.742916	0.623268	0.72957
			0.73611		0.69654	0.886898	0.700644	0.448009			0.810039	1.22714	0.757022	0.80699	0.652551	0.866329	0.612547	0.844322					0.870328	1.15595		0.874813	0.739878	1.2074		0.971982	0.731613	1.03889						0.917666		0.697616			0.605531	0.762999	0.779515	0.70008
			0.785199		0.656457	1.03199	0.686067	0.70788			0.742311	1.47285	0.601973	1.11226	0.58307	0.73189	0.63488	0.904419					0.925873	1.48343		0.861794	0.812196	1.06785		0.83204	0.777484	1.03925						0.983032		0.66415			0.64077	0.772014	0.889633	0.664967
			0.877361		0.63958	1.21752	0.680157	0.604955			0.840948	1.54895	0.613666	0.987395	0.555863	0.669809	0.72042	0.667374					0.888324	1.65593		0.878497	0.848024	0.867781		0.668751	0.837347	0.897354						1.00919		0.686006			0.696621	0.799883	0.93016	0.811176
			0.963028		0.663886	1.40067	0.691739	0.579595			1.11621	1.52358	0.717216	0.945768	0.587958	0.668961	0.996863	0.541715					0.776272	1.50248		0.921872	0.880915	0.7057		0.592073	0.884896	0.79974						0.996476		0.71232			0.938305	0.879282	0.783674	0.744377
			0.82218		0.730082	1.55322	0.735195	0.555101			1.07859	1.45247	0.796025	1.01834	0.674406	0.708136	0.797582	0.548136					0.665049	1.1467		0.987552	0.978159	0.626073		0.608736	0.853558	0.845095						0.962185		0.726567			0.712535	0.639916	0.888367	0.733916
			0.732214		0.82973	1.68751	0.722161	0.492702			0.974363	1.31757	0.752522	1.15716	0.797255	0.801551	0.668231	0.747414					0.598728	0.816404		0.664388	1.02296	0.629479		0.653711	0.865743	1.02247						0.923009		0.736039			0.62029	0.63595		0.731205
			0.799703		0.938205	1.79934	0.703554	0.359455			0.888221	1.10526	0.632696	1.29637	0.927296	0.905798	0.622593	0.961385					0.584343	0.602283		0.591688	0.7173	0.673867		0.68765	0.809989	0.952628						0.871564		0.719665			0.574756	0.624232		0.735648
			0.840987		1.01915	1.85763	0.684821	0.579388			0.853664	0.874005	0.547643	1.39048	1.02738	0.98806	0.617719	1.16951					0.598083	0.479858		0.611991	0.63139	0.697045		0.857797	0.756719	0.757394						0.848381		0.785356			0.554599	0.743291		0.762248
			0.831467		1.03432	1.79623	0.667158	0.500467			0.898921	0.706559	0.53544	1.45637	1.0266	1.05432	0.632269	1.25319					0.778193	1.02245		0.682736	0.773398	0.687687		0.620922	0.717011	0.688769						0.872087		0.80401			0.566436	0.867966		0.78242
			0.779221		1.05627	1.53477	0.746443	0.458944			0.990728	0.643423	0.561847	1.49514	0.889823	1.11579	0.679853	1.17096					0.657004	0.803436		0.774087	0.758336	0.670728		0.562571	0.708032	0.791214						0.920812		0.806468			0.615847	0.902021		0.762632
			0.756033		0.860037	1.02668	0.724076	0.404099			1.06546	0.718623	0.582258	1.43866	0.768938	1.14666	0.773	0.999119					0.626667	0.813665		0.827387	0.773131	0.933331		0.664811	0.709665	0.875419						0.954959		0.758128			0.68222	0.829305		0.709422
			0.800088		0.759561	0.925704	0.695695				1.07925	0.981546	0.615284	1.2658	0.892612	1.08436	0.968095	0.879317					0.655029	0.960377		0.826241	0.786065	1.03988		0.860685	0.783625	0.893969						1.00056		0.718678			0.747877	0.732103		0.667308
			0.899244		0.734874	0.829739	0.657442				1.05292	0.782354	0.693194	1.06005	0.757117	0.924204	0.810455	0.887096					0.693528	1.17285		0.815796	0.749724	1.07926		1.00629	0.845451	0.811033						1.07103		0.725383			1.00501	0.706492		0.789692
			0.750156		0.731546	0.746903	0.583914				1.00631	0.695174	0.827068	0.911228	0.656962	0.726133	0.694633	0.827608					0.71577	1.49044		0.823139	0.680302	1.04815		0.93084	0.87622	0.804652						1.09053		0.724175			0.77102	0.743814		0.739822
			0.697741		0.716615	0.705108	0.737422				0.945607	0.661332	0.833693	0.845475	0.597907	0.599915	0.615316	0.629772					0.763982	1.71684		0.855317	0.615697	0.95421		0.770909	0.864705	0.898599						1.03257		0.717659			0.660866	0.776051		0.741847
			0.77298		0.684267	0.708223	0.707014				0.852282	0.744001	0.628069	0.886519	0.573886	0.582966	0.607599	0.597685					0.75915	1.51379		0.905769	0.570853	0.830826		0.608576	0.778392	1.01986						0.983382		0.725908			0.59266	0.799375		0.739248
			0.866102		0.654302	0.740028	0.666692				0.743161	0.92818	0.634489	1.11649	0.540621	0.63319	0.66047	0.670273					0.860152	1.12921		0.964122	0.787421	0.72604		0.559809	0.718658	1.00492						0.927927		0.738759			0.560579	0.832074		0.724871
			0.946666		0.644879	0.743734	0.599715				0.616019	1.1769	0.731818	0.991831	0.567411	0.698068	0.750434	0.831034					0.805595	0.805309		0.735115	0.777329	0.661997		0.586379	0.687101	0.875751						0.85319		0.814615			0.589707	0.858597		0.724171
			0.93023		0.666527	0.785976	0.737905				1.04357	1.33749	0.812906	0.961945	0.581971	0.762557	0.853487	1.05152					0.711652	0.605978		0.626434	0.748416	0.643503		0.625671	0.694697	0.816058						0.829947		0.814916			0.676131	0.634717		0.755417
			0.845948		0.726789	0.753775	0.718237				1.21056	1.35426	0.78848	1.03244	0.632897	1.08105	0.929132	1.24937					0.637832	0.512617		0.599217	0.723747	0.6608		0.636922	0.692264	0.895317						0.862781		0.785013			0.79124	0.669715		0.761192
			0.792767		0.817025	0.845162	0.687004				1.14904	1.28439	0.672126	1.15792	0.737552	0.824951	0.830578	1.30693					0.612269	1.08853		0.617052	0.70694	0.679425		1.1345	0.745131	1.09756						1.05859		0.837392			0.887212	0.74995		0.727819
			0.820189		0.92067	0.95799	0.639168				1.07607	1.17812	0.562809	1.29689	0.868626	0.686274	0.740313	1.1686					0.612045	0.858495		0.652144	0.679179	0.677832		0.776452	0.820329	0.810364						1.09176		0.770656			0.840734	0.791938		0.691063
			0.921015		1.00687	1.12598	0.736278				0.991518	1.03998	0.528213	1.42535	0.937817	0.643829	0.660858	1.01388					0.617357	0.81787		0.686459	0.640735	0.661422		0.578494	0.848233	0.673494						1.09399		0.765199			0.700032	0.768304		0.816773
			0.832097		1.04113	1.31302	0.723483				0.942962	0.889029	0.545768	1.51828	0.874859	0.687282	0.641031	0.911288					0.686917	0.990593		0.71451	0.611152	0.802569		0.55083	0.850459	0.643564						1.0396		0.757091			0.611924	0.711929		0.762959
			0.736423		0.975975	1.49441	0.692375				0.957659	0.766071	0.578198	1.54053	0.769976	0.798005	0.708941	0.946982					0.654515	1.26767		0.754525	0.586077	0.857828		0.668862	0.745137	0.729811						0.97126		0.731299			0.59124	0.644868		0.763515
			0.698823		0.789342	1.65301	0.777165				1.01366	0.711924	0.623076	1.45494	0.740525	0.943478	0.829449	1.09089					0.675061	1.57558		0.815541	0.701922	0.876819		0.857211	0.688072	0.793598						0.917286		0.733547			0.66128	0.691542		0.74851
			0.759218		0.717115	1.77824	0.76286				1.04988	0.747282	0.709496	1.29292	0.812631	1.10446	0.95593	0.741046					0.705436	1.69568		0.888641	0.756758	0.866196		0.951615	0.667716	0.787148						0.84788		0.789106			0.802182	0.725761		0.706373
			0.890162		0.708692	1.83826	0.848654				1.04418	0.951596	0.656128	1.1187	0.662262	1.22552	0.876038	0.592071					0.719009	1.47564		0.96226	0.738522	0.83959		0.82662	0.677815	0.709317						0.734242		0.84767			0.96043	0.751231		0.681155
			0.994238		0.710619	1.79902	0.785582				1.00801	0.919857	0.661115	0.995399	0.587782	1.26097	0.83083	0.612379					0.750725	1.09199		0.825581	0.70576	0.804664		0.674257	0.711609	0.759424						1.01422		0.851711			0.713224	0.781926		0.715743
			0.982205		0.69953	1.59453	0.697136				0.981182	0.89063	0.753713	0.959635	0.583383	1.22665	0.789125	0.73815					0.7847	0.783177		0.670328	0.674014	0.762346		0.578722	0.764961	0.890519						1.12426		0.824002			0.623452	0.827496		0.749894
			0.892604		0.645848	0.994713	0.675261				0.942436	0.877834	0.848592	1.04467	0.622131	1.14992	0.741672	0.936374					0.778788	0.598246		0.600756	0.645264	0.706226		0.592105	0.817793	1.00439						1.14148		0.874867			0.648745	0.771987		0.74539
			0.822054		0.656356	0.945327	0.730116				0.88741	0.940545	0.865435	0.999358	0.640471	1.01348	0.748782	1.15949					0.714691	0.524719		0.571045	0.630107	0.639966		0.634204	0.67197	0.939023						0.952805		0.79326			0.783992	0.779627		0.728697
			0.834639		0.656221	0.879385	0.687159				0.802299	1.08146	0.764283	1.02681	0.60064	0.816576	0.81987	1.32606					0.645372	1.08052		0.577846	0.622869	0.652193		0.635537	0.653912	0.846083						0.965648		0.791692			0.971699	0.735053		0.799588
			0.913628		0.677388	0.793396	0.677394				0.74527	1.18306	0.620585	1.09806	0.537601	0.642535	0.949589	1.28205					0.612142	0.862222		0.606345	0.588618	0.660226		1.05636	0.617156	0.817522						1.06334		0.788091			1.13969	0.64746		0.781622
			0.869994		0.706795	0.71943	0.69301				1.17025	1.17316	0.533265	1.21339	0.529295	0.569036	1.04845	1.19959					0.610668	0.847442		0.66071	0.57692	0.666341		0.716074	0.615848	0.918864						1.0849		0.742322			0.909357	0.595544		0.746356
			0.69376		0.79972	0.685802	0.68783				1.3279	1.06228	0.529228	1.36844	0.60683	0.611809	0.778233	1.02279					0.618055	0.982889		0.749327	0.648562	0.653419		0.554825	0.691479	1.1259						1.10149		0.730402			1.12346	0.610538		0.689635
			0.661742		0.893717	0.711362	0.679387				1.27012	0.9058	0.573649	1.49938	0.727498	0.706922	0.816613	0.929366					0.627592	1.23301		0.859086	0.696262	0.728015		0.537533		1.01161						0.986639		0.787173			1.23561	0.641397		0.653669
			0.73362		0.980809	0.759142	0.680689				1.20761	0.776599	0.641836	1.53387	0.804564	0.789246	0.862072	0.960751					0.704869	1.51059		0.885623	0.684671	0.756118		0.646478		0.683473						0.92302		0.849113			0.924859	0.663134		0.679486
			0.865467		1.03251	0.799436	0.684474				1.1264	0.705457	0.735029	1.45205	0.784127	0.827429	0.905573	1.08326					0.702105	1.59846		0.715874	0.659406	0.755168		0.79754		0.618688						0.948051		0.875703			0.810238	0.688534		0.727209
			0.964118		0.917155	0.804977	0.680307				1.03543	0.692394	0.685332	1.29443	0.729587	1.47953	0.987594	0.693443					0.725749	1.37105		0.610465	0.631786	0.737903		0.834837		0.635291						0.999847		0.88502			1.34341	0.728619		0.754139
			0.96551		0.742422	0.794204	0.694746				0.967604	0.735667	0.682309	1.14009	0.722146	1.09804	1.09435	0.562824					0.750248	1.01334		0.552369	0.612706	0.727026		0.727563		0.692234						1.02827		0.867179			1.13182	0.787613		0.768897
			0.894682		0.681564	0.803494	0.686879				0.938038	1.17412	0.78164	1.05927	0.777674	0.804515	0.92381	0.531636					0.739122	0.736197		0.543898	0.588636	0.750974		0.612149		0.697551						1.04073		0.78779			0.927978	0.902512		0.81766
			0.833114		0.679478	0.876804	0.672551				0.919911	1.23862	0.903671	1.12405	0.981244	0.659067	1.00052	0.788433					0.720652	0.582807		0.577821	0.626113	0.744013		0.600003		0.687987						0.994663		0.788763			0.771527	0.835933		0.779549
			0.833141		0.683836	1.01824	0.65925				0.892848	1.16901	0.979346	1.05537	0.737512	0.631485		1.04032					0.682565	0.528733		0.651191	0.64409	0.75182		0.674605		0.656579						1.0667		0.788012			1.41074	0.723517		0.732366
			0.887598		0.672038	1.20489	0.688195				0.867059	1.03718	0.919357	1.02544	0.579413	0.716043		1.27717					0.628046	1.03484		0.784556	0.612677	0.737642		0.738816		0.721217						0.956411		0.745081			1.13673	0.626378		0.673806
			0.855132		0.655281	1.40985	0.66301				0.858191	0.952797	0.733126	1.03445	0.535721	0.891303		1.39451					0.604677	0.864261		0.867601	0.633013	0.675743		0.997356		0.868525						0.924932		0.72689			0.898717	0.55586		0.641873
			0.640497		0.653063	1.59956	0.64679				0.867003	1.00289	0.573713	1.12198	0.602378	1.11905		1.35319					0.591739	0.840448		0.728873	0.630655	0.621994		0.677474		0.927618						0.956448		0.772599			0.724419	0.561164		0.656507
			0.627718		0.665313	1.7432	0.638174				0.876143	1.0854	0.525333	1.28483	0.720959	1.29337		1.20153					0.583007	0.958605		0.611372	0.617427	0.621807		0.541192		0.882903						0.99042		0.821289			0.667528	0.574068		0.704061
			0.721998		0.685913	1.81176	0.683904				0.890446	1.05906	0.566839	1.44836	0.766094	1.46863		1.02763					0.592741	1.19009		0.549559	0.603561	0.654586		0.526421		0.821208						0.973566		0.869503			1.31581	0.582872		0.754591
			0.825245		0.718929	1.79729	0.658617				0.93167	0.892012	0.655439	1.51865	0.684942	1.41684		0.916142					0.622808	1.42537		0.543027	0.600229	0.648755		0.611354		0.825719						0.955753		0.916412			1.06343	0.604738		0.763433
			0.896184		0.77512	1.66567	0.648698				1.19418	0.652465	0.767229	1.44734	0.570108	1.23578		0.885637					0.745697	1.46183		0.584433	0.619996	0.757811		0.710571		0.934018						0.910263		0.836715			0.859393	0.655035		0.715421
			0.899471		0.858293	0.936306	0.656529				1.44175	1.27596	0.701607	1.28877	0.52631	1.02332		1.00065					0.756641	1.21508		0.684957	0.652203	0.761835		0.717901		1.12649						0.896509		0.760981			0.700799	0.736545		0.670902
			0.859957		0.953849	0.911986	0.664894				1.37041	1.52272	0.798645	1.06705	0.573611	0.828951		0.561426					0.788501	0.893687		0.795485	0.689575	0.730556		0.646081		0.874935						0.926188		0.765032			0.634815	0.787741		0.647739
			0.827668		1.03248	0.886076	0.671162				1.26438	1.45084	0.934481	1.15892	0.652821	0.678255		0.607573					0.749678	0.669769		0.694998	0.719734	0.683405		0.603965		0.62145						1.00106		0.779314			1.12899	0.706039		0.650527
			0.831853		1.1327	0.834164	0.692668				1.15947	1.20336	1.06781	1.1038	0.689834	0.607104		0.79686					0.670566	0.55635		0.598942	0.576382	0.664098		0.656684		0.588419						0.94377		0.743266			0.965539	0.62291		0.677533
			0.870663		0.870366	0.758114					1.01892	0.971728	1.06883	1.05006	0.675283	0.636966		1.09481					0.612417	0.532212		0.553084	0.588089	0.697761		0.77849		0.638499						0.942983		0.727796			0.831431	0.555582		0.731144
			0.80155		0.698191	0.698301					0.870143	0.950584	0.866856	1.0183	0.665615	0.731382		1.356					0.59785	0.93354		0.560748	0.587005	0.751241		0.854006		0.699076						0.954668		0.745398			0.711054	0.52958		0.696871
			0.722475		0.647068	0.683855					0.76536	1.03412	0.640403	1.07242	0.700491	0.843577		1.44523					0.605453	0.88469		0.621323	0.585646	0.734322		0.965367		0.70709						0.945256		0.783037			0.635797	0.528359		0.67955
			0.697996		0.650949	0.719106					0.717404	1.00677	0.542418	1.21962	0.788494	0.916366		1.35974					0.58656	0.855717		0.572651	0.602227	0.731831		0.678713		0.657152						0.910815		0.834305			0.973255	0.545594		0.670614
			0.737836		0.656187	0.777565					0.710204	1.57034	0.567626	1.38469	0.911276	1.46407		1.18397					0.558303	0.949527		0.563923	0.642772	0.672567		0.55828		0.636698						0.821346		0.793671			0.87618	0.600051		0.669349
			0.793091		0.644714	0.819599					0.719281	1.57293	0.634214	1.48846	0.669219	1.08606		0.928413					0.560054	1.11181		0.601063	0.70189	0.638063		0.533588		0.698891						0.850126		0.727311			0.808507	0.601382		0.669877
			0.823407		0.63185	0.771012					0.735913	1.27933	0.801452	1.47102	0.521503	0.787788		0.867682					0.60863	1.33928		0.671957	0.764502	0.636987		0.581666		0.810558						0.857165		0.740055			0.732429	0.538687		0.70727
			0.821171		0.642137	0.784333					0.778125	0.928182	0.736375	1.13676	0.500498	0.647822		0.824127					0.830052	1.30407		0.663968	0.800954	0.645493		0.640259		0.85941						0.930208		0.760249			0.660383	0.529707		0.708646
			0.811992		0.666479	0.754123					0.855586	0.871624	0.79546	1.09744	0.628112	0.633715		0.894644					0.823076	1.05072		0.673189	0.528599	0.637926		0.649042		0.821008						1.08733		0.741327			0.908309	0.547888		0.692453
			0.818613		0.685244	0.780422					0.988629	0.965996	0.910107	1.09614	0.823125	0.740684		0.595986					0.757912	0.776279		0.679992	0.562737	0.703161		0.625738		0.795206						0.982736		0.723094			0.82741	0.672854		1.52228
			0.847972		0.704557	0.887797					0.995864	0.569157	1.05217	1.1041	0.909805	0.968995		0.55912					0.653012	0.60009		0.66828	0.570063	0.766312		0.636923		0.840896						0.958521		0.720835			0.791789	0.6249		1.53728
			0.883194		0.74871	1.07301					1.52324	0.578676	1.09577	1.1277	0.816877	1.28718		0.772955					0.586363	0.526086		0.648301	0.576775	0.780021		0.723682		0.958153						0.959248		0.741104			0.750486	0.667314		1.25198
			0.923286		0.828484	1.30639					1.45982	0.618784	0.925211	1.1974	0.677113	1.58416		1.08207					0.591752	1.03781		0.62634	0.603908	0.745383		0.863472		0.778215						0.929286		0.784215			0.694688	0.630909		1.32554
			0.730394		0.938719	1.52745					1.22552	0.578171	0.692211	1.30609	0.622247	1.66898		1.37081					0.612915	0.964769		0.720949	0.67543	0.688834		0.739581		0.600759						0.884773		0.74526			0.907705	0.622954		1.40808
			0.753263		1.03238	1.69364					1.08142	0.587732	0.570098	1.37471	0.642253	1.46797		1.45857					0.585108	0.904582		0.721267	0.774518	0.654089		0.612457		0.613696						0.861856		0.690833			0.809905	0.659571		1.36809
			0.768298		1.0964	1.78436					0.90772	0.616095	0.585766	1.1522	0.652199	1.15533		1.3452					0.546148	0.88687		0.697269	0.871278	0.667443		0.567545		0.689865						0.84366		0.713461			0.776906	0.707257		1.1377
			0.778319		0.8135	1.80945					0.750165	0.634581	0.715417	1.1159	0.618494	0.873397		1.13752					0.540042	0.927051		0.675203	0.914115	0.704483		0.575355		0.740502						0.824415		0.740011			0.757678	0.741585		1.02687
			0.769224		0.656396	1.73692					0.634619	0.618635	0.872672	0.875921	0.591435	0.68636		0.881928					0.755567	1.12281		0.657129	0.544271	0.717144		0.605278		0.723217						0.846991		0.740395			0.729055	0.644246		1.14778
			0.762482		0.624047	0.862097					0.606425	0.549227	0.815636	0.885535	0.616506	0.619622		0.798407					0.652255	1.17427		0.635343	0.560577	0.687259		0.624548		0.671087						0.917908		0.729879			0.933568	0.652332		1.27655
			0.777881		0.639132	0.850348					0.626781	0.579751	0.783921	0.886632	0.695671	0.657406		0.743384					0.592381	1.15349		0.612567	0.566108	0.649371		0.636834		0.65193						1.00517		0.714264			0.799386	0.667414		1.28726
			0.822782		0.64889	0.834259					0.677278	0.635792	0.840494	0.882837	0.805708	0.753488		0.805887					0.59546	0.919903		0.603197	0.607572	0.633093		0.674822		0.683498						1.12395		0.713953			0.75887	0.674804		1.42659
			0.87623		0.636001	0.786698					0.710407	0.676321	0.943213	0.872581	0.815752	0.881584		0.590129					0.604679	0.689982		0.618506	0.712878	0.638771		0.761066		0.692973						1.04201		0.710616			0.755586	0.691788		0.98533
			0.94456		0.62676	0.723752					0.763179	0.610261	0.982355	0.979715	0.612172	1.01843		0.727783					0.579772	0.542413		0.725471	0.864145	0.646319		0.857781		0.735295						1.01594		0.660162			0.759395	0.717215		0.860467
			0.795369		0.639793	0.687115					0.848888	0.586003	0.873096	0.9973	0.48357	1.06236		0.929794					0.550318	0.480121		0.758538	0.9989	0.673078		0.705123		0.733758						1.01356		0.682862			0.956379	0.736499		1.00561
			0.758631		0.661928	0.69748					1.26446	0.543009	0.699985	1.00279	0.480834	1.51621		1.3015					0.553591	0.976686		0.750735	1.05601	0.753354		0.619097		0.767797						0.966673		0.71992			0.793439	0.719181		1.14902
			0.786502		0.673702	0.746353					1.41085	0.61407	0.600822	0.98035	0.642008	1.35639		1.39025					0.649574	0.913151		0.726411	0.544707	0.783612		0.582421		0.859079						0.895637		0.740718			0.745686	0.710031		1.18311
			0.766031		0.690828	0.799663					1.20174	0.713698	0.630594	0.921726	0.88596	0.996335		1.26694					0.602021	0.894567		0.687825	0.602108	0.762247		0.585972		0.983628						0.84947		0.748846			0.752708	0.671827		1.07655
			0.7409		0.737109	0.827484					0.997974	0.752466	0.794576	0.851082	0.955054	0.763785		1.06018					0.577031	0.909312		0.646254	0.754256	0.709093		0.625177		0.761914						0.856474		0.738139			0.7852	0.686435		1.28408
			0.741821		0.811867	0.813358					0.855689	0.681077	0.7871	0.813444	0.962804	0.649509		0.866567					0.558125	0.977654		0.613304	0.96482	0.662141		0.672562		0.692666						0.856061		0.723394			0.974565	0.666765		0.88127
			0.77611		0.943975	0.759046					0.73762	0.560708	0.763317	1.16804	0.841424	0.641644		0.732738					0.537376	1.0767		0.590106	1.14183	0.647439		0.696342		0.745387						0.828787		0.68582			0.784539	0.683271		0.778711
			0.837709		1.03754	0.698578					0.679624	0.617138	0.81338	1.14621	0.785831	0.762116		0.67669					0.534278	1.11142		0.586801	1.19906	0.653585		0.939014		0.796816						0.836756		0.643146			0.732713	0.733478		0.914567
			0.906387		1.01774	0.687784					0.685965	0.569315	0.837747	1.16752	0.758981	1.02558		0.743444					0.58805	1.01222		0.616785	0.569211	0.628752		0.800343		0.79069						0.878324		0.677628			0.750272	0.797724		1.04483
			1.02696		0.742571	0.767573					0.74145	0.662904	0.778475	1.18236	0.684248	1.42744		0.602569					0.52787	0.833336		0.740052	0.791001	0.63277		0.681113		0.738807						0.950351		0.730249			0.800826	0.832398		1.08461
			0.860239		0.62385	0.950657					0.800882	0.789117	0.678505	1.1699	0.538676	1.77393		0.671881					0.772719	0.65486		0.758025	1.06483	0.621223		0.60166		0.687156						1.01583		0.762207			0.996333	0.795465		1.04334
			0.801685		0.622254	1.20339					0.826985	0.818106	0.628397	1.10286	0.550133	1.77781		0.903706					0.806707	0.5147		0.762832	1.26411	0.631627		0.566138		0.674024						0.97641		0.768625			0.783523	0.702628		1.5532
			0.77127		0.663005	1.45677					0.820693	0.706713	0.687602	0.989093	0.603561	1.44547		1.14					0.842072	0.81165		0.739474	0.903342	0.653983		0.569019		0.669901						1.00229		0.761713			0.727405	0.645299		1.11769
			0.750994		0.688276	1.64892					0.896216	0.541693	0.868878	0.864022	0.713583	1.05474		1.21164					0.708981	0.848688		0.694315	0.870287	0.667876		0.692341		0.647492						1.0474		0.655438			0.74471	0.856374		0.80638
			0.739907		0.675604	1.76476					1.17567	0.88098	0.709472	0.786049	0.859597	0.77412		1.1145					0.71114	0.888109		0.639809	0.753262	0.636006		0.969345		0.623896						1.06315		0.634103			0.809308	0.7955		0.764513
			0.762383		0.663251	1.81972					1.14994	0.640338	0.702648	0.794423	0.729774	0.646482		0.939071					0.713556	0.951522		0.597364	0.761701	0.717422		0.791671		0.645082						0.986041		0.705382			0.80015	0.743729		0.882136
			0.807674		0.653195	1.7952					1.00362	0.590962	0.712124	1.33447	0.528286	0.645128		0.78039					0.726331	0.998674		0.578441	0.741634	0.757459		0.722504		0.727678						0.890754		0.791383			0.720115	0.707759		0.977791
			0.867598		0.655098	0.858464					0.905587	0.688621	0.688921	1.20477	0.465774	0.716826		0.678173					0.797573	0.980809		0.584856	0.709214	0.752814		1.00647		0.850616						0.840694		0.826358			0.736211	0.70918		1.01343
			0.915987		0.660582	0.802937					0.850185	0.829437	0.644797	1.24455	0.478252	0.839296		0.642209					0.936208	0.900655		0.635344	0.928242	0.712431		0.834087		0.868279						0.847918		0.806835			0.813061	0.785977		1.02577
			0.849961		0.686141	0.793916					0.855134	0.857231	0.639905	1.32348	0.647132	0.994952		0.614542					0.919638	0.789596		0.725919	0.949505	0.660973		0.644102		0.916447						0.853992		0.727619			0.711337	0.898921		1.37227
			0.778744		0.748523	0.779063					0.914452	0.724035	0.722288	1.38268	0.900254	1.14845		0.775212					0.824243	0.66831		0.735182	0.877256	0.629228		0.645218		0.968414						0.840953		0.628172			0.719207	0.945979		0.867616
			0.747365		0.85204	0.733428					1.01532	0.534532	0.87232	1.40191	1.07828	1.46846		0.896279					0.724137	0.51397		0.748532	0.803875	0.614707		0.759688		0.941741						0.829698		0.608024				0.864112		0.737508
			0.750129		0.982802	0.687					1.08065	0.764721	0.679436	1.37491	1.0945	1.4464		0.972506					0.695719	0.729853		0.752625	0.77053	0.604352		0.968349		0.832966						0.84806		0.755936				0.716873		0.762889
			0.7776		0.924614	0.685204					0.801935	0.622827	0.61972	1.26139	1.0268	1.20753		0.900572					0.676893	0.771427		0.733888	0.759823	0.600703		0.845531		0.71693						0.91014		0.87783				0.621112		0.875066
			0.822343		0.681969	0.7292					1.00436	0.580593	0.617107	1.07518	0.95427	0.898849		0.749406					0.663974	0.830557		0.68621	0.741565	0.611695		0.726035		0.669394						0.949963		0.905195				0.903552		0.946413
			0.864783		0.607834	0.78178					1.05242	0.672235	0.608301	0.886806	0.85663	0.73371		0.687985					0.709657	0.882468		0.628057	0.678036	0.643178		0.618135		0.676852						0.856495		0.847705				0.834013		0.976985
			0.895267		0.646236	0.813519					1.02469	0.812562	0.602342	0.761723	0.668863	0.657623		0.637225					0.834204	0.90312		0.585983	0.947026	0.682029		0.609142		0.626904						0.944685		0.765519				0.823084		1.00703
			0.896134		0.709988	0.809727					1.02475	0.843193	0.619677	0.73706	0.576225	0.659984		0.654607					0.742735	0.882554		0.571262	0.853028	0.606312		0.728149		0.581581						1.03918		0.620533				0.788669		1.71977
			0.84224		0.776109	0.776907					1.06654	0.726792	0.682317	1.79484	0.55814	0.787826		0.747465					0.775579	0.835223		0.591583	0.843568	0.670056		0.890621		0.531694						1.05493		0.644048				0.748343		1.28406
			0.773933		0.774703	0.713657					1.16341	0.532898	0.460365	1.41297	0.632153	1.09191		0.750632					0.740486	0.7834		0.676223	0.774591	0.710725		0.922807		0.557909						1.01286		0.791768				0.753526		0.840509
			0.763322		0.732069	0.648592					1.23288	0.629691	0.461529	1.16175	0.758724	1.53842		0.694147					0.707374	0.7066		0.71611	0.751583	0.718139		0.792406		1.07033						0.905593		0.921642				0.839656		0.676763
			0.789208		0.684977	0.630011					1.15471	0.685546	0.45478	1.17175	0.926573	1.87726		0.630686					0.671249	0.668477		0.713218	0.761256	0.692684		0.743016		1.19943						0.842757		0.93576				0.960537		0.741661
			0.844473		0.65547	0.704287					1.20641	0.646735	0.596011	1.33172	0.663146	1.70043		0.606902					0.644743	0.731008		0.72419	0.762338	0.65137		0.689886		1.22306						0.832183		0.863691				0.999121		0.863191
			0.896399		0.659879	0.891143					1.25214	0.562438	0.563111	1.47856	0.528086	1.32656		0.619152					0.650785	0.781897		0.730703	0.706701	0.614983		0.614858		1.04033						0.833601		0.639815				0.899529		0.935499
			0.926241		0.705613	1.15582					1.25027	0.533528	0.820036	1.57327	0.452864	0.955523		0.607142					0.73444	0.81469		0.709808	0.809629	0.594014		0.599173		0.855946						0.837836		0.664328				0.747265		0.959445
			0.920265		0.792136	1.41947					1.43149	0.620127	0.72731	1.62647	0.486582	0.744309		0.592679					0.947437	0.825012		0.665743	0.871276	0.588421		0.683094		0.658878						0.852069		0.794045				0.645941		0.9826
			0.839898		0.908644	1.62582					1.49843	0.744599	0.662221	1.60457	0.656283	0.668627		0.533994					0.466864	0.823912		0.616147	0.784343	0.600076		0.805838		0.618835						0.870211		0.883471				0.886247		1.71698
			0.829204		1.03154	1.75295					1.31617	0.785314	0.624885	1.43646	0.902533	0.675667		0.505569					0.608407	0.808111		0.576751	0.726116	0.623609		0.906069		0.666718						0.891435		0.885014				0.830563		1.33948
			0.858806		0.837585	1.8241					1.07678	0.709579	0.608757	1.16704	1.09967	0.747271		0.531386					0.715347	0.59027		0.568535	0.718397	0.661883		0.990865		0.641032						0.906732		0.822231				0.834758		0.855962
			0.906364		0.632685	1.80364					0.85513	1.39737	0.588807	0.909377	1.1862	0.862289		0.763151					0.745268	0.676746		0.604284	0.752594	0.713117		0.767569		0.516623						0.899762		0.671848				0.806247		0.669358
			0.951904		0.602522	0.846343					0.697409	1.29956	0.552595	0.736123	1.17189	1.02785		0.760304					0.729157	0.745467		0.665913	0.780338	0.585239		0.71164		1.43963						0.792498		0.687669				0.784137		0.716674
			0.96989		0.68099	0.758956					0.816161	1.02411	1.03142	0.678869	1.06816	1.43601		0.778675					0.701959	0.806173		0.66932	0.753532	0.629575		0.741069		1.41648						0.868449		0.763441				0.814453		0.837506
			0.93553		0.794575	0.738935					1.29927	0.772608	0.922855	0.75145	0.880485	1.33082		1.17145					0.668233	0.844188		0.688887	0.782756	0.661389		0.757162		1.21732						0.981918		0.807881				0.821894		0.926082
			0.96523		0.87221	0.698821					1.39434	0.648373	0.880885	1.69715	0.655068	1.06366		0.879775					0.645323	0.632743		0.700456	0.684917	0.674599		0.693393		0.84263						1.06939		0.754207				0.895946		0.962916
			0.923462		0.86909	0.677146					1.23161	0.630498	0.808685	1.48964	0.578798	0.81857		0.721769					0.697026	0.753051		0.683355	0.660647	0.666425		0.610373		0.769273						1.03032		0.683163				0.98496		1.71568
			0.91429		0.795958	0.655762					1.02439	0.625079	0.734297	1.17756	0.594837	0.700107		0.76012					0.886874	1.35445		0.645317	0.668974	0.637464		0.617677		0.84109						0.928109		0.716192				0.902149		1.4405
			0.932516		0.699892	0.654471					0.856954	0.571739	0.679401	1.08102	0.688328	0.661698		0.773312					0.408268	1.18679		0.601432	0.726141	0.606867		0.700465		0.793197						0.862595		0.728201				0.794689		1.00133
			0.964249		0.67125	0.758054					0.729495	0.491496	0.650434	1.18855	0.82622	0.693046		0.786165					0.537744	1.10146		0.56965	0.802007	0.592404		0.805039		0.775605						0.841669		0.710311				0.717202		0.760601
			0.971821		0.688029	0.80534					0.645114	0.472181	0.630928	1.39628	0.879182	0.854626		0.845596					0.65454	1.04051		0.564437	0.817964	0.600078		0.879721		0.945833						0.843351		0.660703				0.674739		0.745044
			0.921572		0.755953	0.806706					0.737907	0.553572	0.597328	1.5754	0.620503	1.18609		0.955553					0.727363	1.04088		0.598255	0.595764	0.621896		0.703049		0.840889						0.867636		0.657469				0.915167		0.828408
			1.08421		0.858855	0.768598					1.21354	0.658022	0.544799	1.7005	0.496497	1.57252		1.36606					0.754068	1.16085		0.610338	0.5662	0.652781		0.718119		0.801773						0.902986		0.67177				0.871657		0.92004
			0.990326		0.98377	0.719253					1.31602	0.711677	0.483454	1.72859	0.443459	1.7856		1.07885					0.743412	1.36298		0.644032	0.589909	0.695939		0.840852		0.791564						0.909604		0.739416				0.862754		0.97162
			0.938161		1.06356	0.667234					1.20952	0.693845	1.17473	1.71805	0.500455	1.53785		0.859886					0.714411	1.32592		0.669011	0.674123	0.583239		0.939169		0.929161						0.89647		0.894769				0.823316		1.49948
			0.924673		0.771588	0.627979					1.0597	1.25509	1.00932	1.58002	0.680653	1.15613		0.795546					0.677824	1.14121		0.668461	0.810789	0.601995		0.842618		0.816688						0.890302		0.964514				0.802415		1.21108
			0.931316		0.594061	0.633364					0.930548	1.24861	0.918293	1.23233	0.920451	0.879789		0.81409					0.698103	1.06478		0.636571	0.838963	0.622782		0.638735		0.793256						0.885853		0.915895				0.862323		0.960277
			0.932404		0.592855	0.729829					0.822688	1.13409	0.884437	0.857131	1.12558	0.735916		0.830405					0.840037	1.00297		0.599369	0.861535	0.641625		0.555977		0.8073						0.746792		0.832561				0.949706		0.863016
			1.00584		0.702106	0.928651					0.74066	0.964188	0.84638	0.689437	1.23609	0.687034		0.840106					0.395887	0.942589		0.562415	0.600392	0.651257		0.602222		1.16256						0.788388		0.695127				0.976314		0.866491
			0.926683		0.812845	1.18979					0.821939	0.815703	0.778713	0.628403	1.21854	0.690743		0.89571					0.472933	0.917869		0.551341	0.61722	0.644095		0.712224		0.902808						0.89606		0.643312				0.943836		0.915487
			0.876424		0.921715	1.44121					1.23423	0.742721	0.70882	0.687107	1.06251	0.734151		0.999338					0.588018	0.957517		0.543609	0.654929	0.628963		0.813012		0.782815						0.996657		0.744031				0.896989		1.54521
			0.85535		0.90582	1.63274					1.33232	0.710471	0.664513	1.46602	0.825321	0.831466		1.10891					0.692132	1.05393		0.558601	0.935862	0.618516		0.68522		0.766854						1.00893		0.849282				0.855115		1.39262
			1.45059		0.817593	1.75725					1.25437	0.660237	0.640105	1.43015	0.646843	0.964435		1.39414					0.760504	1.185		0.59832	0.913554	0.629882		0.765387		0.817202						0.947729		0.898628				0.815876		1.21692
			1.32668		0.709117	1.81086					1.14199	0.559603	0.615546	1.16781	0.595558	1.46395		1.25885					0.781203	1.11133		0.623223	0.790713	0.654767		0.980614		1.18573						0.888042		0.923255				0.760042		1.06834
			1.26115		0.70331	1.73747					1.02177	0.45172	0.588392	1.03002	0.641775	1.26206		0.993486					0.767686	1.01695		0.658051	0.66804	0.695983		1.14264		0.907718						0.86985		0.904895				0.969451		0.970561
			1.27384		0.741754	0.866411					0.92609	0.426126	0.563072	1.04998	0.755805	0.967155		0.858442					0.737623	0.997057		0.644935	0.61453	0.739141		0.984575		0.762129						0.895174		0.845576				0.94137		0.903901
			1.40385		0.827397	0.72905					0.863041	0.497175	0.541905	1.20956	0.927904	0.757239		0.849424					0.728982	0.970628		0.604508	0.626379	0.592818		0.670866		0.738309						0.899577		0.742847				0.909187		1.52181
			1.35215		0.941009	0.690114					0.604195	0.588138	1.14064	1.41981	0.810708	0.660777		0.891064					0.808948	0.92572		0.501472	0.656896	0.595834		0.515768		0.812848						0.948121		0.704201				0.845894		1.43958
			1.27919		1.02265	0.655568					1.02328	0.65233	0.945064	1.58641	0.582473	0.651921		0.92053					0.437249	0.879569		0.561589	0.658089	0.606691		0.529399		0.917403						0.921577		0.759491				0.808334		1.31324
			1.26655		0.768816	0.650119					1.32976	0.689476	0.866482	1.7152	0.478769	0.74226		0.941909					0.379275	0.864427		0.531146	1.01122	0.633043		0.641029		1.56981						0.886396		0.804632				0.852537		1.13387
			1.28171		0.566959	0.648294					1.38101	1.13933	0.859171	1.83146	0.446746	0.959327		0.984421					0.399633	0.880727		0.522337	0.930469	0.667575		1.08329		1.25367						0.877291		0.828119				0.921331		1.61236
			1.39862		0.576003	0.646134					1.31503	1.1445	0.842207	1.83697	0.522834	1.297		1.00145					0.50528	0.950949		0.569355	0.797482	0.688044		0.766463		0.934353						0.866025		0.881686				0.923496		1.60727
			1.29953		0.679688	0.76152					1.20346	1.14461	0.762584	1.60907	0.720696	1.5551		1.0783					0.634416	0.98167		0.614574	0.681669	0.692381		0.673884		0.753095						0.712218		0.848272				0.886876		1.5191
			1.25193		0.825558	0.795243					1.08493	1.09054	0.701742	1.24593	0.982109	1.51539		1.06018					0.725341	0.960274		0.646971	0.635488	0.684303		0.794236		0.71458						0.715169		0.804196				0.889076		1.28478
			1.23312		0.903128	0.774082					0.981529	0.988088	0.643227	0.916146	1.18928	1.24385		1.29698					0.792563	0.982694		0.647259	0.647144	0.683223		1.05805		0.798837						0.817212		0.741205				0.916067		1.67037
			1.28138		0.883695	0.717786					0.918408	0.906331	0.61778	0.695241	1.25604	0.976466		1.09478					0.798769	0.987526		0.60628	0.671895	0.69567		1.22831		0.929457						0.903573		0.732803				0.91137		1.58133
			1.38975		0.80829	0.664572					0.814309	0.868728	0.609811	0.599117	1.15694	0.808897		0.908607					0.77267	0.951515		0.588675	0.66999	0.732529		0.98874		1.51379						0.95648		0.764004				0.838234
			1.49384		0.722712	0.637421					1.17465	0.825118	0.616185	0.62574	0.931216	0.728626		0.859369					0.742523	0.890909		0.549542	1.04627	0.614381		0.677456		1.63991						0.936114		0.773993				0.720374
			1.52193		0.753471	0.64064					1.38363	0.731817	0.632378	0.778824	0.718506	0.690051		0.904803					0.779696	0.824923		0.538986	0.909818	0.619061		0.494959		1.29756						0.891553		0.755155				1.01889
			1.15936		0.820489	0.699029					1.40162	0.602817	0.636733	1.36782	0.616669	0.672868		0.976775					0.353815	0.78197		0.557956	0.779055	0.660787		0.485888		0.938118						0.886591		0.820044				0.993895
			1.1949		0.916567	0.835023					1.33066	0.466533	0.59975	1.15521	0.620293	0.685201		1.02107					0.328848	0.799511		0.590441	0.687985	0.725241		0.588799		0.726499						0.925731		0.779387				0.949225
			1.30851		0.999412	1.04547					1.22239	0.41276	1.04269	0.954499	0.692271	0.70223		1.05266					0.414775	1.05544		0.627564	0.651923	0.782037		1.00756		0.688533						0.951924		0.744269				0.876754
			1.46602		0.747913	1.28521					1.11097	0.465293	0.865578	0.930849	0.821114	1.52054		1.06092					0.555942	0.913362		0.631658	0.663984	0.805938		0.727003		0.781655						0.944456		0.721082				0.812071
			1.60401		0.567227	1.50312					0.999315	0.553262	0.824615	1.03024	0.733542	1.26292		1.08342					0.688149	0.952696		0.62408	0.691358	0.79624		0.6534		0.902						0.895832		0.736562				0.807393
			1.62906		0.559045	1.66612					0.883376	0.636641	0.842444	1.20871	0.553096	0.921781		1.04643					0.76592	1.00896		0.58788	0.691214	0.765867		0.779234		1.07361						0.856789		0.749233				0.840441
			1.0532		0.657976	1.75778					0.770611	0.720305	0.830696	1.37688	0.471856	0.781694		0.916454					0.783133	1.03581		0.571766	0.866015	0.740451		1.01964		1.57644						0.83331		0.736753				0.84447
			1.15634		0.774168	1.75332					0.790727	1.0738	0.729634	1.49995	0.464123	0.618922		0.979784					0.755511	0.980747		0.570546	0.749855	0.679069		1.13976		1.56784						0.68911		0.760579				0.846411
			1.34112		0.841308	0.738813					0.963413	1.00739	0.654432	1.6015	0.569325	0.638751		0.93872					0.727759	0.919853		0.586206	0.680273	0.736206		0.939388		1.23335						0.763695		0.717414				0.895047
			1.5547		0.837403	0.700754					1.24609	1.03902	0.591588	1.70422	0.808167	0.796734		0.816751					0.761469	0.823391		0.639108	0.657225	0.824527		0.641581		0.869806						0.835083		0.702797				0.971233
			1.71442		0.799912	0.691244					1.36698	1.0973	0.577498	1.66381	1.10251	1.07599		0.841606					0.888826	0.742724		0.624734	0.675021	0.90882		0.483102		0.666625						0.88243		0.71918				0.969274
			1.71459		0.785635	0.674968					1.34509	1.1113	0.594039	1.53085	1.29349	1.32062		0.939343					0.386944	0.714899		0.617532	0.709548	0.953078		0.475778		0.661532						0.889306		0.73006				0.866621
			1.11783		0.799905	0.669205					1.27299	1.07429	0.625016	1.21623	1.25076	1.34863		1.04777					0.297338	0.923535			0.713908	0.944903		0.930999		0.770757						0.859922		0.721334				0.724538
			1.39133		0.905656	0.696778					1.20184	1.02802	0.660066	0.912003	1.00565	1.16548		1.11788					0.339544	0.882787			0.809285	0.850783		0.679445		0.883365						0.868161		0.685567				1.02175
			1.65431		0.991344	0.69566					1.13644	0.990909	0.679044	0.704708	0.746048	0.96803		1.14421					0.45719	0.970792			0.713059	0.952198		0.623283		1.07678						0.905923		0.706015				1.00882
			1.68334		0.810946	0.759588					1.04383	0.923245	0.655107	0.599975	0.60923	0.836458		1.18045					0.610256	1.05804			0.666539	1.04497		0.727786		0.833707						0.905815		0.671584				0.955221
			1.62606		0.606691	0.69932					0.873881	0.806633	1.11007	0.594677	0.597138	0.757851		1.12761					0.694334	1.0964			0.653395	1.10418		0.901408		0.879657						0.875804		0.684387				0.886328
			1.48567		0.556394	0.674023					0.698956	0.657658	0.936752	0.69684	0.6584	0.713846		1.01768					0.707442	1.05739			0.670071	1.05034		0.9482		1.26379						0.844298		0.714974				0.80268
			1.47669		0.619019	0.633085					0.833525	0.516562	0.812936	1.30777	0.753902	0.680292		0.871751					0.682779	0.957499			0.704858	0.897541		0.781467		1.47889						0.821221		0.723564				0.748101
			1.65313		0.712689	0.633714					0.832279	0.443894	0.813403	0.974118	0.856945	0.625063		0.938887					0.68419	0.837103			0.702194	0.751424		0.580255		1.29284						0.772984		0.697966				0.73685
			1.8669		0.782363	0.691591					1.03512	0.486719	0.850014	0.82764	0.969622	1.27316		1.0172					0.748605	0.732663			0.654695	0.691682		0.482007		1.06654						0.758782		0.754609				0.757462
			1.66348		0.775682	0.813226					1.29128	0.587544	0.826449	0.858855	0.666276	0.894072		0.830804					0.324294	0.675789			0.629332	0.743521		0.493378		0.74569						0.798555		0.668561				0.813895
			1.3502		0.814248	0.992215					1.34273	0.689867	0.719373	0.999735	0.531966	0.675318		0.733877					0.30544	0.841677			0.749676	0.878808		0.846598		0.605184						0.809259		0.659499				0.917354
			1.59803		0.84102	1.1949					1.24534	0.984854	0.600123	1.17194	0.472872	0.591882		0.807392					0.381856	0.874137			0.65325	0.964187		0.636429		0.655884						0.808765		0.676804				0.995317
			1.85463		0.922933	1.39676					1.1676	0.90462	0.529018	1.30272	0.505274	0.642474		0.95668					0.516368	1.00005			0.57419	0.9453		0.594332		0.779893						0.810202		0.712114				0.95482
			1.92127		1.00384	1.56137					1.13278	0.894492	0.539445	1.38218	0.675462	0.849823		1.11087					0.596733	1.10656			0.52777	1.06589		0.662402		0.887493						0.820849		0.710182				0.823581
			1.8046		0.700925	1.67965					1.13608	0.981108	0.570099	1.44859	0.978235	1.11501		1.20448					0.60058	1.14847			0.508052	0.972061		0.751701		1.00342						0.855083		0.674848				0.685712
			1.46807		0.582321	1.72803					1.12675	1.09117	0.608466	1.42105	1.29925	1.20962		1.26153					0.587968	1.1048			0.49001	0.84333		0.746933		0.946247						0.828405		0.747152				0.982808
			1.73487		0.596963	0.795738					1.03451	1.17588	0.643381	1.44203	1.41471	1.07344		1.26586					0.629339	0.994914			0.787806	0.735033		0.635922		1.13234						0.783937		0.671054				0.93186
			1.93787		0.673171	0.773432					0.727663	1.19874	0.670902	1.38293	1.19013	0.896564		1.1725					0.734452	0.865725			0.689258	0.69122		0.529208		1.32565						0.77212		0.668949				0.858105
			1.94422		0.746532	0.771167					0.731235	1.16817	0.677397	1.15985	0.827307	0.767854		0.958993					0.343178	0.741997			0.63354	0.735222		0.496793		1.31404						0.767954		0.68609				0.75512
			1.79641		0.802792	0.750959					0.669362	1.05404	0.654592	0.921486	0.587178	0.707706		0.855499					0.366889	0.658628			0.598356	0.828389		0.778094		1.12694						0.762274		0.698105				0.701962
			1.43461		0.85887	0.718963					0.953773	0.974167	1.06058	0.743608	0.530462	0.699966		0.861987					0.448249	0.796816			0.571899	0.878101		0.622096		0.84505						0.773886		0.683911				0.671529
			1.82766		0.946471	0.638148					1.28963	0.829233	0.890664	0.616415	0.592939	0.703778		0.986324					0.507507	0.868115			0.544133	0.847389		0.582952		0.628832						0.742576		0.6377				0.697674
			1.96211		0.655427	0.706744					1.31412	0.688828	0.808723	0.603528	0.707983	0.62767		1.06033					0.503631	1.00206			0.50416	0.777543		0.604484		0.607344						0.740783		0.739411				0.800258
			1.92928		0.617402	0.713896					1.16636	0.574438	0.830654	0.668702	0.832887	1.23245		0.806149					0.50012	1.1222			0.46035	0.70056		0.627005		0.70259						0.754755		0.692895				0.92466
			1.75992		0.673082	0.685109					1.04876	0.530813	0.876422	1.47062	0.83487	0.848863		0.688083					0.554162	1.1819			0.705889	0.942714		0.60123		0.810952						0.769927		0.699293				0.976722
			1.86191		0.755954	0.644402					1.02003	0.598594	0.805037	1.22927	0.622247	0.651405		0.764736					0.702116	1.15639			0.653006	0.888064		0.54704		0.897864						0.78783		0.705242				0.8912
			1.92785		0.829949	0.622178					1.06758	0.717025	0.683103	0.876893	0.517526	0.59515		0.943404					0.463912	1.05968			0.637804	0.816705		0.513947		1.03543						0.766143		0.690428				0.742166
			1.85654		0.711023	0.665511					1.1358	0.813701	0.571229	0.765856	0.488683	0.669712		1.13535					0.441632	0.91375			0.639171	0.75352		0.526948		0.936182						0.710697		0.645494				0.929622
			1.6576		0.69295	0.780812					1.21583	1.00201	0.511405	0.82813	0.589841	0.869717		1.26296					0.430678	0.714185			0.628836	0.719435		0.764385		1.07458						0.690119		0.582926				0.878155
			1.8391		0.711827	0.956859					0.863966	0.96344	0.519432	0.987437	0.805431	1.03954		1.32256					0.491468	0.646182			0.591082	0.727883		0.633932		1.28896						0.70221		0.728965				0.813214
			1.84337		0.744254	1.15095					0.566781	0.859758	0.548575	1.15697	1.23278	1.01293		1.32095						0.782376			0.533118	0.764401		0.602308		1.28912						0.750104		0.709747				0.675612
			1.73174		0.773179	1.31506					0.52405	0.787575	0.573704	1.26914	1.52438	0.86815		1.20555						0.847505			0.474255	0.780991		0.575577		1.12329						0.742399		0.723669				0.687135
			1.49697		0.687757	1.44177					0.887405	0.844084	0.60255	1.25554	1.46957	0.70369		0.973528						0.966139			0.773459	0.757629		0.551899		0.888911						0.762483		0.720141				0.66179
			1.72016		0.645689	1.55495					1.25413	0.982013	0.639293	1.34035	1.06465	0.609202		0.900219						1.09051			0.598912	0.701898		0.531821		0.681836						0.755129		0.680707				0.690552
			1.5559		0.645422	1.60392					1.27518	1.13663	0.678902	1.31646	0.668915	0.606407		0.878253						1.19324			0.627672	0.645657		0.522019		0.621537						0.749729		0.614958				0.788985
					0.663384	0.888192					1.10628	1.26044	0.706603	1.27047	0.502448	0.633537		0.914647						1.23476			0.650672	0.796317		0.528016		0.689888						0.745089		0.560165				0.900709
					0.699897	0.907021					0.945421	1.32832	1.05429	1.20353	0.510738	1.13969		0.983757						1.15865			0.679223	0.816461		0.822877		0.778794						0.69228		0.736712				0.865809
					0.741885	0.908863					0.901306	1.30432	0.905044	1.09236	0.619885	0.79729		0.852956						0.978011			0.681177	0.815841		0.72762		0.84692						0.623115		0.724335				0.798102
					0.772176	0.87342					0.96702	1.17334	0.839751	0.945127	0.773678	0.647931		0.693097						0.77679			0.639906	0.810309		0.660121		0.892857						0.996713		0.742878				0.658918
					0.917563	0.804743					1.07108	0.904977	0.853667	0.80666	0.753733	0.631038		0.731718						0.631225			0.572825	0.791521		0.592181		0.909917						1.02322		0.733307				0.81897
					0.717405	0.722935					1.18209	0.803316	0.89354	0.702537	0.550202	0.714332		0.885918						0.790396			0.508633	0.760776		0.541042		1.19288						1.04404		0.679369				0.757939
					0.628965	0.67027					1.11083	0.680429	0.862416	0.653187	0.511854	0.849544		1.08242						0.816582			0.46206	0.723349		0.525247		1.31103						1.03127		0.615469				0.718319
					0.607011	0.66042					0.546276	0.624698	0.725746	0.697676	0.509547	0.90872		1.24791						0.867191			0.736796	0.701665		0.540304		1.16773						1.08687		0.582208				0.690636
					0.616024	0.644879					0.611759	0.664928	0.579608	1.42712	0.725472	0.848052		1.3423						1.01511			0.635685	0.6932		0.957337		0.933316						1.04809		0.906207				0.691704
					0.634485	0.624741					0.983743	0.806241	0.508632	1.12458	1.08244	0.706448		1.35373						1.14118			0.546107	0.68215		0.843813		0.722698						1.02669		0.77242				0.717341
					0.660407	1.06524					1.23573	0.948933	0.507021	0.832037	1.46405	0.570022		1.23451						1.32473			0.649849	0.651787		0.750956		0.63561						0.981916		0.745592				0.795763
					0.687108	1.08097					1.21303	0.906149	0.528883	0.770841	1.63376	1.04609		1.02531						1.26279			0.690955	0.61867		0.659046		0.691375						0.952343		0.742167				0.847545
					0.743182	1.04123					1.05259	0.987222	0.541963	0.870198	1.36925	0.768809		0.87576						1.0321			0.709892	0.685486		0.587699		0.780439						0.986598		0.724355				0.778462
					0.772845	0.930536					0.889242	0.954784	0.560018	1.0514	0.88155	0.67163		0.82236						0.775442			0.677907	0.721084		0.566232		0.844897						1.17388		0.677025				0.717396
					1.09136	0.772855					0.821768	0.840195	0.604615	1.14125	0.55165	0.685151		0.838189						0.612133			0.612357	0.763112		0.97208		0.879695						1.11441		0.635394				0.613466
					0.816133	1.21557					0.869629	0.788534	0.670407	1.31362	0.48952	0.752402		0.913836						0.902397			0.546592	0.807661		0.860736		0.874189						1.07791		0.621779				0.709241
					0.658974	1.24498					0.960688	0.891221	0.74839	1.25876	0.554037	0.808647		0.953347						0.802211			0.491878	0.82459		0.755508		1.2818						1.05537		0.94102				0.698275
					0.600588	1.2129					1.01727	1.07946	0.973697	1.28155	0.688644	0.79661		0.758884						0.786093			0.751424	0.789097		0.672233		1.23577						0.993205		0.798299				0.693623
					0.595304	1.27499					1.05946	1.24452	0.87831	1.17726	0.840563	0.709898		0.718515						0.815132			0.649352	0.715045				1.0168						0.910592		0.737068				0.711698
					0.612054	1.24677					0.650741	1.3507	0.856957	1.08533	0.709719	1.01337		0.80042						0.938724			0.620844	0.651077				0.763235						0.879588		0.709919				0.745378
					0.633317	1.20985					0.879234	1.41702	0.898802	1.04643	0.570924	0.790757		0.958718						1.1847			0.640999	0.629683				0.656636						0.864313		0.69006				0.781863
					0.647214	1.19802					1.21757	1.40895	0.901082	1.02346	0.52094	0.714325		1.16443						1.37789			0.678791	0.636852				0.669287						1.09593		0.66809				0.785597
					0.669962	1.25501					1.28818	1.18399	0.782745	0.964522	0.605836	0.731345		1.33036						1.30994			0.699327	0.63457				0.756538						1.07443		0.650229				0.728337
					0.706496	1.26851					1.17259	0.989035	0.618146	0.866935	0.87412	0.775519		1.38162						1.03874			0.682079	0.624925				0.83625						1.07614		0.627632				0.648243
					0.747932	1.22373					1.02382	0.765523	0.523372	0.767385	1.24473	0.776783		1.25497						0.75787			0.633868	0.618385				0.885922						1.08209		0.959572				0.687419
					1.20388	1.16262					0.886363	0.646737	0.515474	0.706274	1.52471	0.711961		1.01277						0.588817			0.578509	0.655744				0.899379						1.0837		0.786829				0.685333
					0.929312	1.12009					0.808284	0.656971	0.545187	1.33632	1.49491	0.841621		0.821087						0.888241			0.524834	0.718767				1.36422						1.04473		0.711613				0.702872
					0.725508	1.07215					0.807647	0.802145	0.548417	1.01324	1.12209	0.763136		0.744071						0.80221			0.794404	0.792181				1.14857						0.913758		0.680432				0.738984
					0.618472	1.03516					0.841663	1.04475	0.544866	0.82634	0.715577	0.769078		0.758007						0.773122			0.691329	0.830317				0.889881						0.792179		0.668429				0.756289
					0.588196	1.02916					0.867027	1.21356	0.578942	0.846288	0.517889	0.789		0.859332						0.784791			0.637194	0.75422				0.699534						0.753952		0.663534				0.73511
					0.602776	1.07483					0.865796	0.765823	0.659445	1.01354	0.526949	0.761183		0.887376						0.911119			0.634121	0.706997				0.644108						0.801215		0.648099				0.676594
					0.63921	1.14851					0.884755	0.783497	0.775317	1.21716	0.651425	0.808266		0.72525						1.10491			0.65483	0.626897				0.701521						1.07333		0.616938				0.612754
					0.627554	1.17295					0.721098	0.950527	1.08017	1.33922	0.814923	0.792923		0.709942						1.35335			0.663853	0.603247				0.788179						1.00217		0.777163				0.673679
					0.664977	1.15692					1.10308	1.06436	0.90148	1.36956	0.67962	0.799139		0.83129						1.26147			0.655529	0.628053				0.850697						0.981574		0.707436				0.701027
					0.668112	1.1503					1.41966	1.02012	0.839849	1.34424	0.548962	0.749599		1.05801						0.988601			0.634036	0.653302				0.891435						1.0255		0.689832				0.722455
					0.684563	1.10519					1.36695	0.90053	0.900903	1.25223	0.535005	0.847346		1.2863						0.726644			0.604648	0.656804				0.91558						1.08081		0.680642				0.71117
					0.721074	1.03494					1.18519	0.881024	0.961146	1.10882	0.67276	0.806825		1.37413						0.559363			0.576057	0.577494				1.44424						1.12282		0.666673				0.667531
					0.75184	0.970666					1.03114	1.0429	0.883296	0.990482	0.956639	0.80153		1.23284						0.854395			0.742564	0.60781				1.1042						1.10042		0.635204				0.677655
					1.04316	0.930256					0.912746	1.26512	0.673368	0.950306	1.24436	0.836947		0.962556						0.797185			0.670546	0.672639				0.815406						0.944898		0.784407				0.924367
					0.794573	0.90867					0.839978	1.38769	0.592323	0.896545	1.3498	0.808423		0.755436						0.788167			0.642259	0.752955				0.651313						0.760997		0.741332				0.926596
					0.654561	0.911022					0.795726	1.41671	0.59137	0.949329	1.19131	0.766183		0.678131						0.821098			0.635767	0.805131				0.647637						0.714666		0.734603				0.885866
					0.592975	0.941646					0.772711	1.44563	0.629183	0.88429	0.865848	0.743471		0.709599						0.955039			0.625477	0.785704				0.731079						0.709843		0.711961				0.8013
					0.592278	0.999729					0.774257	1.46525	0.610054	0.793204	0.598293	0.646648		0.851259						1.16897			0.623732	0.704768				0.796925						1.0043		0.672996				0.86132
					0.636359	1.07661					0.804198	1.32817	0.560202	0.72583	0.517053	0.596219		0.746118						1.26654			0.631057	0.631465				0.823425						0.919841		0.623722				0.862858
					0.694517	1.20116					0.832464	0.991284	0.559661	1.2121	0.590208	0.636194		0.643479						1.14186			0.645364	0.613534				0.821018						0.906376		0.80377				0.836601
					0.692099	1.07817					0.849636	0.75261	0.638435	0.930812	0.775609	0.775695		0.745067						0.903313			0.656586	0.646259				1.51366						0.989122		0.781123				0.792703
					0.719311	1.05398					0.731376	0.612889	0.786587	0.853154	0.668702	0.987081		0.849207						0.682454			0.797205	0.68354				1.10067						1.05441		0.775888				0.764319
					0.698334	1.08143					1.13735	0.666098	0.76812	0.971739	0.537819	1.15362		1.19601						0.526982			0.725365	0.694507				0.776442						1.16492		0.734966				0.817251
					0.696073	1.08853					1.46078	0.906556	0.808994	1.21809	0.547241	0.778207		1.27926						0.830012			0.674234	0.541627				0.61921						1.15746		0.67499				0.868186
					0.713619	1.02892					1.42555	1.25103	0.901659	1.40867	0.661386	0.707795		1.13143						0.807152			0.638179	0.565976				0.645089						0.979111		0.799639				0.862461
					0.745776	0.90494					1.22875	1.47339	1.02608	1.42204	0.920146	0.643642		0.867429						0.829639			0.578644	0.62546				0.732198						0.778403		0.790384				0.823812
					1.22285	0.863729					1.05739	0.86385	0.973923	1.36596	1.08102	0.553267		0.688195						0.89919			0.611523	0.701888				0.757629						0.738704		0.782006				0.755945
					0.916124	0.809694					0.934393	0.742884	0.869949	1.3141	1.06269	0.503652		0.638369						1.0393			0.612233	0.762515				1.11445						0.822531		0.73859				0.853353
					0.710793	0.835617					0.867777	0.851857	0.74023	1.23942	0.889465	0.553522		0.70862						1.18208			0.664176	0.763746				0.764779						0.892387		0.680068				0.832883
					0.613919	0.846498					0.829052	1.05092	0.775615	1.1152	0.683199	0.722139		0.76197						1.17049			0.764559	0.706894				0.586255						0.919467		0.777842				0.87506
					0.583829	0.872985					0.805018	1.16223	0.795368	0.985233	0.554429	0.956517		0.598015						1.00881			0.726267	0.648511				0.591649						0.838591		0.759162				0.923559
					0.609859	0.914641					0.802869	1.09136	0.709162	0.910971	0.543167	1.14696		0.701269						0.800814			0.673064	0.633106				0.802992						0.850306		0.742201				0.913988
					0.683036	0.989425					0.81854	0.986223	0.585815	0.893176	0.675595	1.19426		0.900133						0.627334			0.633843	0.644458				0.785293						0.948074		0.720753				0.812101
					0.744475	1.06505					0.827013	1.03201	0.543074	0.879429	0.68726	1.0285		1.07456						0.819166			0.635832	0.695535				0.81831						1.09256		0.707339				0.746667
					0.816884	1.26963					0.790675	1.24909	0.612274	0.834136	0.551078	0.749096		1.11447						0.823097			0.690246	0.701926				0.79479						1.16804		0.766975				0.704289
					0.805277	1.1515					0.704378	1.47227	0.779079	0.767513	0.554299	0.653255		0.971412						0.867099			0.780901	0.503003				0.769082						1.15379		0.70134				0.849439
					0.762238	1.04033					0.668548	1.5027	0.901874	0.728182	0.65476	0.617319		0.758318						0.9693			0.874702	0.526701				0.800182						0.997258		0.670775				0.853139
					0.730375	0.990381					0.96862	1.46934	0.792617	1.11155	0.795264	0.581588		0.621224						1.11659			0.690792	0.580828				0.879249						0.812995		0.679858				0.920114
					0.733095	1.01756					1.30952	1.45211	0.892115	0.878892	0.862893	0.526409		0.630177						1.18911			0.695088	0.655319				0.788891						0.78278		0.650032				0.994036
					0.751527	1.06255					1.41525	1.48601	1.05562	0.895182	0.80755	0.493723		0.608137						1.09218			0.696513	0.721336				0.75676						0.742235		0.586202				0.978777
					1.13999	1.05431					1.28612	1.38478	1.09337	1.09992	0.693643	0.52901		0.695468						0.900947			0.757757	0.742593				0.784359						0.847762						0.884788
					0.827177	0.981785					1.09257	1.07962	1.0548	1.38147	0.588805	0.651258		0.847803						0.711589			0.862055	0.707586				1.0585						0.824978						0.753453
					0.662389	0.833532					0.944638	0.755991	1.01713	1.49215	0.547857	0.837159		0.955178						0.566056			0.965644	0.658633				0.886326						0.776076						0.704215
					0.597041	0.759916					0.874267	0.593803	1.0486	1.39535	0.625093	1.01224		0.946736						0.817817			0.764569	0.638009				0.790979						0.812197						0.892318
					0.591551	0.759354					0.879895	0.663395	0.988681	1.28585	0.591401	1.10704		0.816103						0.819261			0.827046	0.654824				0.763531						0.910542						0.793345
					0.636615	0.813564					0.915721	0.968077	0.795087	1.248	0.567341	1.08878		0.662008						0.872008			0.919893	0.677064				0.800088						1.04514						0.825689
					0.73001	0.847498					0.928539	1.43581	0.597204	1.22441	0.611379	0.970555		0.584494						0.985367			0.695883	0.671086				1.05827						1.11437						0.933873
					0.823565	0.865945					0.901849	0.792226	0.522657	1.14865	0.674183	0.781265		0.736166						1.12849			0.767935	0.495125				0.879828						1.08566						1.03738
					0.923838	0.887254					0.838218	0.804576	0.588182	1.02162	0.691686	1.6071		0.808886						1.15346			0.733135	0.5545				0.801304						0.968657						1.04293
					0.912369	0.936583					0.759922	0.962317	0.765286	0.847901	0.649221	1.31024		0.842009						1.01886			0.630546	0.62921				0.802599						0.848343						0.911515
					0.848685	0.999642					0.684353	1.16044	0.95666	0.812199	0.582153	0.899947		0.807744						0.828813			0.636912	0.694446				0.864742						0.84999						0.768208
					0.764972	1.09339					0.646584	1.23299	0.812966	0.772619	0.552966	0.65787		0.708276						0.651203			0.721424	0.717625				1.2184						0.875191						0.695791
					0.757788	1.05735					0.570955	1.14693	0.868915	0.745373	0.589758	0.574425		0.595245						0.790673			0.88323	0.692684				0.99644						0.798862						0.787212
					0.761246	1.00849					0.645967	1.09368	1.0173	0.721107	0.672598	0.570413		0.741449						0.776484			0.816026	0.653127				0.842607						0.773635						0.72216
					1.05226	0.967465					1.00131	1.20841	1.12104	0.734966	0.607788	0.576869		0.697536						0.826348			0.671552	0.628056				0.805128						0.72687						0.782229
					0.764112	0.977768					1.32869	1.44744	1.30628	1.06404	0.607634	0.567217		0.642366						0.940525			0.607019	0.62702				0.870603						0.775822						0.930711
					0.633955	1.02218					1.34118	1.63019	1.35776	0.882245	0.619391	0.556616		1.41969						1.06375			0.618543	0.627334				0.97323						0.87324						1.07183
					0.59703	1.07771					1.12602	1.62805	1.31509	0.951451	0.604298	0.558146		1.44745						1.06877			0.693738	0.484506				1.1101						0.986512						1.04338
					0.607127	1.0534					0.958036	1.52843	1.12233	1.18153	0.562072	0.591571		1.57779						0.945811			0.826049	0.568222				0.905121						1.04169						0.961042
					0.656424	0.941595					0.873535	1.48143	0.823764	1.408	0.534973	0.679045		1.39472						0.77835			0.928266	0.643794				0.772508						1.00163						0.761964
					0.765294	0.812994					0.905587	1.48961	0.587712	1.42566	0.510692	0.812829		1.1083						0.617695			0.823487	0.691163				0.783897						0.928067						0.719642
					0.909239	0.745527					0.992731	1.37615	0.511904	1.27737	0.801487	0.945226		0.922921						0.740773			0.708688	0.697497				0.92692						0.889615						0.702838
					1.01525	0.769344					1.04667	1.0742	0.579219	1.17491	0.695624	1.02462		0.861535						0.699136			0.631156	0.669245				1.06875						0.913626						0.667784
					1.01615	0.833461					1.00499	0.751257	0.766123	1.1661	0.662423	1.00622		0.915986						0.746462			0.607906	0.63209				1.06195						0.890486						0.755703
					0.927451	0.897882					0.900023	0.582778	0.888314	1.19128	0.643441	0.879619		0.913639						0.854566			0.629509	0.605003				1.14675						0.741654						0.939629
					0.830717	0.908018					0.78947	0.666086	0.848571	1.16024	0.58567	0.698277		0.985077						0.957653			0.680604	0.589643				0.992626						0.700416						1.11253
					0.772309	0.903967					0.7338	1.01114	0.927238	1.0346	0.480125	0.579536		0.89241						0.962093			0.759605	0.662426				0.803126						0.74862						1.13739
					0.758216	0.914206					0.726432	1.58938	1.12044	0.865698	0.977187	0.564899		0.815449						0.869646			0.85855	0.72017				0.686222						0.833055						1.01837
					1.26995	0.940193					0.734668	0.861432	1.37438	0.738164	0.848392	1.74317		0.711622						0.738591			0.92079	0.724319				0.739435						0.932986						0.826308
					0.964634	1.12024					0.387923	0.778958	1.52361	0.676391	0.791451	1.87515		1.50816						0.592523			0.801245	0.691545				0.930613						0.985519						0.778613
					0.707798	0.985489					0.704986	0.868374	1.42877	0.660299	0.722069	1.71496		1.49216						0.644798			0.698356	0.641873				1.10297						0.950684						0.781124
					0.614256	0.962469					1.16203	1.04511	1.12203	0.684985	0.631196	1.27538		1.43786						0.755052			0.631383	0.599336				1.03083						0.907999						0.647376
					0.59976	0.963469					1.31647	1.21446	0.777997	1.07114	0.64096	0.816813		1.25975						0.85492			0.610879	0.572138				1.00235						0.912342						0.643957
					0.619101	0.96289					1.15479	1.24828	0.562431	0.949893	0.699813	0.590366		1.06251						0.87206			0.623955	0.878264				0.870411						0.871331						0.769797
					0.653283	0.970851					0.98193	1.19242	0.513243	1.03289	0.667661	0.553549		0.932092						0.765129			0.649005	0.806897				0.705074						0.884712						0.990001
					0.78384	1.00856					0.88052	1.21921	0.602273	1.21966	0.616979	0.580632		0.885806						0.695022			0.669721	0.710981				0.606706						0.73944						1.15989
					0.946734	1.06539					0.892938	1.38264	1.04611	1.34788	0.584572	0.630184		0.914854						0.526137			0.691739	0.616915				0.681648						0.704354						1.17036
					1.075	1.09501					0.979877	1.5925	0.858045	1.29655	0.606901	0.664262		0.961375						0.651452			0.721796	1.09887				0.879309						0.733775						1.04687
					1.07889	1.02359					1.06341	1.71155	0.835598	1.1505	0.651897	0.669341		0.936272						0.761717			0.858533	0.939597				1.07151						0.797566						0.908952
					0.97467	0.903313					1.06532	1.68823	0.99236	1.06942	0.645534	0.63593		0.860672						0.81115			0.70519	0.760998				0.924098						0.887005						0.825761
					0.852781	0.776734					0.991407	1.59733	1.25853	1.09001	0.635863	0.575813		0.813717						0.776988			0.608093	0.724841				0.869369						0.935141						0.812174
					0.775657	0.734985					0.890613	1.52329	1.4398	1.1377	0.590105	0.551227		0.822412						0.675273			0.577158	0.868701				0.752254						0.924974						0.606769
					0.758816	0.798085					0.815391	1.4509	1.3354	1.12183	0.541294	0.619769		0.851766						0.766418			0.598955	0.789162				0.613695						0.895685						0.643868
					1.20305	0.908123					0.772207	1.27218	1.0032	1.00204	0.549707	0.755462		0.847612						1.10389			0.63875	0.719463				0.549513						0.881171						0.817974
					0.893551	0.984964					0.757064	0.984882	0.6909	0.826421	0.615203	0.884065		1.51536						1.0636			0.65779	0.662587				0.643284						0.867438						1.05504
					0.67292	0.971209					0.755845	0.720375	0.540498	0.687715	0.640134	0.938886		1.45057						0.982149			0.645076	0.611237				0.826059						0.81678						1.20303
					0.60108	0.956047					0.525143	0.602043	0.546418	0.622189	0.620127	0.868994		1.31051						0.880011			0.622134	1.11635				1.02268						0.732142						1.17571
					0.597683	0.931334					1.00903	0.692249	0.656896	0.625698	0.619872	0.719328		1.16128						1.01794			0.62594	1.1389				0.863537						0.709861						1.04434
					0.605289	0.921759					1.2726	1.07416	0.913477	0.71014	0.594469	0.60898		1.01166						1.04215			0.673124	1.05326				0.866831						0.760047						0.909271
					0.663285	1.08793					1.20281	0.796592	0.784933	1.14934	0.557712	0.599104		0.912917						1.04238			0.82126	0.921053				0.785694						0.835235						0.831286
					0.798455	0.954178					1.03166	0.772481	0.863773	1.07952	0.548583	1.85749		0.875543						0.984387			0.65703	0.819601				0.664097						0.884202						0.803882
					0.967419	0.911675					0.909752	0.886249	1.05296	1.14766	0.584533	1.90078		0.875749						0.895219			0.565726	0.763086				0.546568						0.890066						0.579741
					1.0931	0.927405					0.879135	1.04826	1.18684	1.26059	0.640878	1.62869		0.873303						0.981318			0.551151	0.714822				0.5312						0.852925						0.658275
					1.08372	0.959869					0.926305	1.17369	1.09398	1.29391	0.735297	1.13203		0.835671						0.935648			0.597288	0.667682				0.646324						0.810974						0.862753
					0.969761	0.985648					1.01064	1.20881	0.822173	1.18806	0.639256	0.717595		0.789304						0.978963			0.644081	0.615689				0.820895						0.764202						1.09437
					0.841761	1.0041					1.0594	1.23634	0.604449	1.04856	0.631374	0.54225		0.780157						1.00487			0.651134	0.568163				1.01309						0.690845						1.1987
					0.768993	1.04138					1.04446	1.35186	0.537047	0.994749	0.659834	0.541943		0.80543						0.978683			0.614817	0.966406				0.925265						0.695322						1.14745
					0.768885	1.08104					0.971809	1.52546	0.601108	1.02614	0.674685	0.629838		0.838522						0.85484			0.572191	1.08242				0.899291						0.762954						1.01275
					1.10441	1.07774					0.867647	1.66403	0.74855	1.07261	0.653859	0.743755		0.858701						0.969958			0.567404	1.0816				0.798226						0.805997						0.887449
					0.862011	0.992017					0.767207	1.70589	0.992228	1.04893	0.616201	0.825027		1.45366						0.906725			0.611516	0.996588				0.650175						0.814255						0.785949
					0.662413	0.856041					0.708571	1.67613	0.778616	0.932458	0.599567	0.825068		1.33205						0.932743			0.813858	0.864853				0.539441						0.782693						0.782777
					0.593074	0.755473					0.710333	1.60519	0.782258	0.78233	0.610514	0.743571		1.17812						0.965547			0.665927	0.754187				0.56029						0.735013						0.55439
					0.590262	0.753819					0.875324	1.48668	0.825687	0.668701	0.643372	0.616946		1.06874						0.96169			0.569582	0.699486				0.700974												0.661214
					0.620426	0.857433					1.20509	1.30786	0.917808	0.627096	0.886706	0.514903		0.959141						0.901648			0.55475	0.667565				0.879623												0.871959
					0.687342	1.00761					1.24167	1.08255	0.838005	0.668336	0.703505	0.502829		0.890236						1.17484			0.589178	0.629171				1.06434												1.06065
					0.815152	1.09841					1.09225	0.855146	0.669912	1.20399	0.643483	0.593075		0.857198						0.975111			0.629377	0.583733				1.01121												1.12699
					0.979035	1.06533					0.964636	0.639193	0.556213	1.19729	0.687997	0.719106		0.826918						0.902246			0.62275	0.539777				0.956841												1.06573
					1.07777	0.981544					0.899301	0.626263	0.564043	1.26006	0.779409	0.804124		0.776984						0.901573			0.584838	0.881701				0.875013												0.964057
					1.03849	0.977756					0.89726	0.743378	0.688207	1.31912	0.838788	0.792029		0.725293						0.92678			0.54485	0.988866				0.713321												0.858454
					0.918066	0.950096					0.936527	1.14656	0.807651	1.28148	0.81343	0.693273		0.709553						0.950218			0.54525	0.997014				0.594256												0.796002
					0.807593	0.992786					0.97792	1.04614	0.769044	1.1262	0.725474	0.605593		0.741334						0.928699			0.58897	0.935712				0.626265												0.769049
					0.763034	0.883894					0.978449	0.784103	0.773172	0.9771	0.640104	0.594056		0.786843						1.00793			0.710987	0.820082				0.777432												0.645515
					0.78381	0.865327					0.928492	0.759751	0.753138	0.92572	0.602547	0.653822		0.815993						0.959728			0.611086	0.709635				0.973717												0.823294
					1.13688	0.906848					0.834024	0.849488	0.681436	0.95857	0.618143	1.80675		0.841732						0.892661			0.570543	0.655538				1.01147												0.95389
					0.865849	0.963622					0.738056	0.964645	0.587032	0.992352	1.06928	1.739		1.25037						0.875379			0.574515	0.633029				1.09673												0.990602
					0.670164	1.01236					0.680479	1.05297	0.559002	0.956534	0.796357	1.38343		1.08163						0.899844			0.588248	0.606923				1.08687												0.941468
					0.593074	1.03144					0.690216	1.12207	0.625886	0.853359	0.640462	0.93188		0.967566						0.951395			0.584461	0.562173				0.98869												0.867323
					0.580562	1.03103					0.633841	1.2373	0.810469	0.746116	0.642401	0.633272		0.901648						0.966984			0.566762	0.520134				0.815669												0.808266
					0.612017	1.03412					0.712701	1.41737	0.830678	0.6823	0.723012	0.520607		0.870236						1.01379			0.555938	0.759396				0.682833												0.777958
					0.694279	1.03335					1.08047	1.57269	0.781779	0.697184	0.952986	0.555014		0.844632						0.892953			0.566841	0.872987				0.709166												0.770047
					0.834299	0.997207					1.21653	1.63237	0.717446	1.18206	1.04246	0.691658		0.790428						0.849043			0.602437	0.905676				0.856446												0.647855
					0.982296	0.915272					1.13695	1.60576	0.647539	1.21504	0.991855	0.875783		0.706536						0.847041			0.743527	0.874707				1.06074												0.732969
					1.03385	0.815229					1.0269	1.54867	0.60265	1.29776	0.798986	1.00836		0.643317						0.891524			0.668371	0.782692				1.15996												0.826628
					0.959479	0.764341					0.938028	1.4503	0.619437	1.35659	0.689391	1.0031		0.653973						0.950753			0.59624	0.681774				1.17081												0.840357
					0.837713	0.808204					0.878602	1.27866	0.738436	1.28538	0.613164	0.880109		0.708484						0.973423			0.560219	0.627934				1.09194												0.794776
					0.756584	0.941911					0.841058	1.06792	0.946703	1.08665	0.615958	0.713603		0.755721						0.861571			0.544391	0.608704				0.917646												0.74126
					0.744077	1.1006					0.815688	0.883666	0.879331	0.909834	0.673354	0.57864		0.781164						0.776418			0.544353	0.588077				0.780942												0.724936
					0.799118	1.18711					0.784961	0.713355	0.787698	0.852173	0.971906	0.512786		0.810142						0.76919			0.563698	0.544728				0.785866												0.736365
					1.13381	1.16773					0.749977	0.672024	0.714659	0.87791	0.697226	0.524436		1.05603						0.807264			0.596552	0.502943				0.905853												0.672873
					0.876435	1.10371					0.720876	0.666711	0.687632	0.905902	0.56738	0.594664		0.876496						0.884794			0.631226	0.625255				1.16403												0.704683
					0.683516	1.05448					0.715074	0.807045	0.740744	0.869298	0.629723	0.674548		0.845215						0.945811			0.643064	0.757913				1.21365												0.719316
					0.595792	1.02429					0.72987	1.09498	0.897684	0.785704	0.863193	0.697598		0.855367						0.946258			0.707798	0.81452				1.1516												0.673622
					0.543163	0.940187					0.757135	0.808219	0.952869	0.721876	1.11862	0.643145		0.838294						0.681632			0.626126	0.817032				0.976238												0.621217
					0.607426	0.784395					0.931649	0.750375	0.874917	0.723068	1.23042	0.585403		0.767241						0.698653			0.557859	0.761004				0.829414												0.617912
					0.701635	0.80321					1.17681	0.788941	0.821544	0.826417	1.14761	0.57614		0.670232						0.778443			0.521684	0.676293				0.934332												0.655009
					0.845564	0.869796					1.16334	0.840832	0.843656	1.08622	0.937131	0.639971		0.606774						0.879384			0.530933	0.620026				1.07356												0.64954
					0.963688	0.959895					1.06295	0.893665	0.93602	1.10661	0.732272	1.42994		0.628042						0.92841			0.589194	0.593942				1.13214												0.644283
					0.969375	1.0449					0.951603	0.985296	0.588825	1.21513	0.624354	1.07009		0.686214						0.913663			0.66817	0.569719				0.85512												0.59813
					0.8677	1.08246					0.841162	1.14686	0.533941	1.30563	0.618706	0.759013		0.719839						0.65599			0.729451	0.524965				0.986265												0.543107
					0.757082	1.05621					0.738517	1.33888	0.528328	1.24254	0.683687	0.586864		0.733724						0.635226			0.580819	0.476306				1.08127												0.528306
					0.703723	1.00425					0.656268	1.45958	0.545337	1.02604	0.867832	0.531689		0.771139						0.764166			0.53939	0.641433				1.09604												0.621458
					0.72432	0.962268					0.603463	1.46652	0.567411	0.830344	0.621398	0.577979		0.848396						0.874348			0.558327	0.728675				0.803968												0.569528
					0.795749	0.930348					0.594946	1.4025	0.572967	0.758078	0.502999	0.730087		0.807493						0.830137			0.645955	0.773348				0.904887												0.521787
					1.1408	0.896975					0.637113	1.3082	0.776122	0.78712	0.61467	0.958789		0.839826						0.898188			0.765586	0.768426				0.994072
					0.876609	0.848077					0.721325	1.16541	0.71745	0.830723	0.900281	1.15445		0.834542						0.661814			0.85265	0.720028				1.04887
					0.684561	0.809206					0.803421	0.986254	0.671462	0.811066	1.21846	1.17739		0.763601						0.64192			0.58647	0.659219				1.01824
					0.549187	0.815541					0.825555	0.832037	0.631431	0.753335	1.35685	1.03598		0.659129						0.769618			0.623969	0.60592				0.815424
					0.576162	0.894649					0.758318	0.740579	0.59907	0.733503	1.25809	0.861954		0.604196						0.894684			0.701619	0.554548				0.854116
					0.612557	1.02543					1.16641	0.699192	0.575687	0.798977	1.00639	0.725645		0.631782						0.953119			0.8716	0.494023				0.915587
					0.704037	1.14986					1.21779	0.690975	0.563949	0.976478	0.757676	0.636523		0.675681						0.913343			0.810018	0.438302				0.970237
					0.828364	1.20895					1.0976	0.715555	0.569682	0.947197	0.627889	0.587924		0.687046						0.646432			0.507803	0.660701				0.989955
					0.906786	1.19667					0.947393	0.881903	0.631676	1.05693	0.615215	0.586244		0.68916						0.667096			0.555289	0.774423				0.973364
					0.879502	1.16624					0.829735	0.770955	0.829087	1.16701	0.684645	0.614666		0.72312						0.77863			0.599067	0.843269				0.805778
					0.782223	1.14532					0.734555	0.73644	0.769721	1.12616	0.774113	0.627185		0.915232						0.944406			0.527591	0.837145				0.828336
					0.698942	1.13881					0.665663	0.721856	0.823754	0.930219	0.590559	0.601291		0.815834						1.02925			0.517674	0.767977				0.852198
					0.674195	0.98332					0.626576	0.741875	0.869844	0.74204	0.523838	0.570337		0.824686						0.628119			0.535137	0.660638				0.891505
					0.71246	0.734464					0.624358	0.830044	0.848633	0.675579	0.604375	0.577743		0.82178						0.793661			0.559745	0.552986				0.915641
					0.782466	0.725085					0.669431	0.976749	0.767014	0.668936	0.883091	0.593889		0.758931						1.01489			0.570794	0.456996				0.916827
					1.12904	0.809163					0.755758	1.12989	0.676072	0.794181	1.23285	1.18922		0.665551						1.13478			0.77505	0.852334				0.790137
					0.864713	0.937308					0.844599	1.2145	0.620651	0.811132	1.41531	0.848279		0.618012						0.811734			0.6414	0.992579				0.812868
					0.676087	1.06138					1.05579	1.21578	0.589575	0.776292	1.33311	0.656624		0.645358						1.09889			0.564499	1.02502				0.824265
					0.550071	1.14057					1.28256	1.15842	0.578549	0.792576	1.06379	0.576443		0.679328						1.21871			0.537289	0.939085				0.83232
					0.588303	1.1243					1.15334	1.04881	0.597097	0.880853	0.721195	0.558754		0.681368									0.532726	0.7694				0.840549
					0.62394	1.03646					1.02895	0.89726	0.668417	0.811026	0.614478	0.59765		0.680109									0.541449	0.569815				0.869362
					0.695557	0.933651					0.977152	0.750532	1.00329	0.898456	0.594225	0.719634		0.866284									0.543252	1.01186				0.728716
					0.780066	0.865311					0.961255	0.672336	0.729934	1.00317	0.667926	0.947504		0.817206									0.894392	1.19567				0.795457
					0.821565	0.837083					0.93338	0.66489	0.720653	0.981144	0.825216	1.20154		0.809209									0.874042	1.23193				0.793053
					0.793633	0.833298					0.88722	0.69446	0.847471	0.768623	0.725979	1.31323		0.763002									0.768634	1.14651				0.777227
					0.731143	0.83631					0.836999	0.733834	0.971048	0.673204	0.593035	1.22019		0.684749									0.662684	0.929999				0.773389
					0.690719	0.853505					0.808007	1.01102	0.97311	0.621883	0.539692	1.05643		0.640023									0.593301	1.38606				0.800432
					0.696921	0.906199					0.778527	0.833584	0.867457	0.689374	0.594515	0.933159		0.66057									0.479505	1.41628				0.878401
					0.738151	0.983966					1.16453	0.72233	0.749453	0.809074	0.826653	0.840858		0.689937									0.546455	1.21481				0.813929
					1.20536	1.06479					1.207	0.66981	0.676508	0.862103	1.10536	0.749401		0.701895									0.543901	0.881444				0.815399
					0.863553	1.12797					1.26431	0.673664	0.637587	0.859828	1.42722	0.672776		0.717576									0.535179	1.05116				0.790347
					0.672245	1.16335					1.38834	0.733562	0.60636	0.763432	1.39946	0.62362		0.848867									0.908762	1.18389				0.758468
					0.560669	1.18843					1.45647	0.829243	0.594579	0.732239	1.05059	0.59235		0.805269									0.86982	0.931154				0.758744
					0.601576	1.22017					1.4257	0.923523	0.629993	0.789866	0.805227	0.574828		0.765333									0.772893	1.14248				0.831313
					0.629346	1.25737					1.30484	0.981535	0.704789	0.862299	0.596712	0.576746		0.70538									0.672385	1.22331				0.869831
					0.675844	1.27846					1.16349	0.979416	1.26209	0.832995	0.558229	0.610969		0.667229									0.609856	1.13883				0.850542
					0.722379	0.744078					1.95277	0.925348	0.936168	0.718154	0.588939	0.628704		0.675223									0.581154	0.894213				0.826736
					0.748296	0.673485					1.98239	0.829557	0.735406	0.612786	0.817356	1.07601		0.710149									0.572756	0.686681				0.801961
					0.750339	0.747721					1.03841	0.708839	0.730525	0.616771	0.711134	0.7563		0.749983									0.569593	0.644105				0.822729
					0.720723	0.889407					1.05941	0.618837	0.85679	0.69577	0.595441	0.619174		0.803849									0.55817	0.682283				0.897947
					0.755855	1.05204					1.03108	0.593384	0.984463	0.714377	0.542745	0.57903		0.824151									0.907867	0.737714				0.90072
					0.785117	1.179					0.958431	0.633209	0.987841	0.730213	0.573441	0.542179		0.767242									0.895397	0.778422				0.913511
					0.814559	1.21552					0.852149	0.723339	0.886401	0.620227	0.764347	0.539765		0.705056									0.725103	0.877704				0.951528
					1.28038	1.13347					0.723243	0.80288	0.776147	0.597373	1.11709	0.678917		0.677611									0.609109	1.07309				0.94264
					0.893411	0.991224					0.628981	0.775339	0.712543	0.896119	1.34051	0.892299		0.679951									0.621152	1.12405				0.985424
					0.684462	0.864075					0.602601	0.746648	0.68212	0.949577	1.47178	1.1898		0.726144									0.602201	1.03585				1.03376
					0.60493	0.795405					0.64482	0.740422	0.651015	0.975413	1.23036	1.40471		0.799266									0.612816	0.848756
					0.601497	0.798295					0.728577	0.742161	0.62303	0.944298	0.865118	1.38895		0.683656									0.621589	0.699756
					0.624779	0.832766					1.06107	0.760426	0.632279	0.868127	0.592339	1.18837		0.644678									0.611713	0.672522
					0.655168	0.873829					1.10417	0.794221	0.676298	0.817721	0.492322	1.15436		0.818053									0.916183	0.713638
					0.688842	0.927322					1.11686	0.819129	0.732688	0.978015	0.615826	0.982795		0.824562									0.836292	0.7665
					0.733654	0.98919					1.10941	0.806219	1.23972	1.05378	0.812421	0.932109		0.820138									0.715686	0.808823
					0.785297	1.03481					1.05434	0.72269	1.13618	1.12245	1.05759	0.774581		0.898361									0.63871	0.772555
					0.815327	1.04863					0.946255	0.663188	0.920522	1.13121	0.705677	0.634254		0.944323									0.576451	0.945883
					0.899167	1.05706					0.816487	0.593799	0.815837	1.05647	0.576293	0.566725		0.962004									0.664181	0.987069
					0.937063	1.1016					0.710708	0.565991	0.809545	0.933438	0.518853	0.573115		0.853782									0.696867	0.927645
					0.93731	1.19722					0.658037	0.579803	0.863998	0.84091	0.547723	0.613153		0.831222									0.698981	0.803467
					1.32968	1.30468					0.666211	0.957111	0.903741	0.786722	0.725201	0.679963		0.857095									0.848028	0.707467
					0.956977	1.3862					0.722112	0.924436	0.883071	0.793313	1.07448	0.80367		0.891764									0.760024	0.703582
					0.703206	1.41412					0.777883	0.839145	0.811131	1.10062	1.4295	1.0226		0.91254									0.636764	0.748866
					0.600045	0.644318					0.979219	0.768822	0.742631	1.05405	1.54187	0.711808		0.906008									0.677817	0.804446
					0.588023	0.669803					1.09279	0.740412	0.708764	1.1321	1.33756	0.601931		0.876439									0.724911	0.846178
					0.61217	0.818971					1.10195	0.738672	0.702656	1.23415	0.945755	0.575796		1.51938									0.783184	0.663344
					0.651854	1.00469					1.12204	0.695165	0.691528	1.29281	0.611749	0.572456		1.16725									0.755363	0.813196
					0.712592	1.18304					1.15046	0.600775	0.672785	1.2652	0.497579	0.57904		0.927509									0.741835	0.85522
					0.799887	1.28905					1.16353	0.521503	0.661715	1.14461	0.591991	0.658014		0.859917									0.78254	0.827135
					0.89538	1.26351					1.12247	0.517719	0.671636	0.978037	0.803516	0.836709		0.875524										0.760714
					1.01414	1.13133					1.03766	1.19236	0.70435	0.840901	1.03301	1.1906		0.907537										0.714831
					1.09048	0.959909					0.931966	1.15427	1.10773	0.760589	0.698572	1.44729		0.9229										0.729582
					1.11073	0.824161					0.841538	0.971409	1.01891	0.765342	0.547882	1.48677		0.904588										0.782207
					1.03706	0.776083					0.793267	0.806142	0.946784	1.50445	0.488652	1.38874		0.856777										0.839649
					0.737138	0.805654					0.777277	0.730844	0.944933	1.27849	0.530977	1.30783		0.846451										0.875549
					0.594749	0.859875					0.77665	0.709349	0.94025	1.13601	0.724214	1.22019		1.80997										0.567256
					0.569605	0.911569					0.801312	0.636884	0.879763	1.18577	1.06728	1.04501		1.44493										0.693781
					0.607969	0.961439					0.791286	1.27869	0.787496	1.31346	1.43555	0.796539		1.05952										0.741146
					0.681699	1.00666					1.01232	1.05058	0.724388	1.40795	1.59537	0.604049		0.895896										0.743581
					0.79154	1.01297					1.09458	0.821159	0.69652	1.41947	1.42145	0.543		0.886024										0.727794
					0.941373	0.990587					1.07522	0.710431	0.678191	1.34497	1.02081	0.597585		0.93441										0.723763
					1.09651	1.00436					1.07463	0.933862	0.64979	1.19594	0.645611	0.687882		0.917406										0.758084
					1.21867	1.10848					1.12292	0.964772	0.679763	1.00889	0.492208	0.784443		0.936385										0.821372
					1.27481	1.28353					1.21176	0.992438	0.709805	0.845207	0.575564	0.906565		0.879344										0.872775
					1.11319	1.445					1.26697	1.0807	0.722285	0.742696	0.78233	1.36476		0.814283										0.586724
					0.78843	1.52947					1.25267	1.14996	0.709769	0.726918	0.917582	0.917073		0.813244										0.655116
					0.602125	1.49866					1.15382	1.13199	0.687461	0.81476	1.12564	0.660445		1.72627										0.690106
					0.562841	0.789543					1.03619	0.996837	0.677021	1.65462	1.04906	0.580285		1.26662										0.720544
					0.624912	0.618392					0.929237	0.998423	1.01706	1.45109	0.688249	0.569295		0.9771										0.752676
					0.752215	0.706888					0.843242	1.06411	0.954416	1.21916	0.528293	0.570084		0.889605										0.778444
					0.926956	0.893708					0.780274	1.2102	0.99391	1.19185	0.475192	0.585557		0.936033										0.84588
					1.11566	1.11186					0.741956	1.31847	1.08264	1.32582	0.544036	0.694013		0.995277										0.604299
					1.27484	1.28676					0.857719	1.24318	1.01522	1.47337	0.760273	0.939378		0.993402										0.69647
					1.36627	1.34977					1.02596	1.03221	0.911624	1.52653	1.09632	1.25592		0.885753										0.769677
					0.872743	1.28232					1.0652	0.998186	0.69666	1.46907	1.44652	1.46676		0.828312										0.823857
					0.654724	1.0845					1.0139	0.989554	0.574814	1.35626	1.54278	1.46469		0.764711										0.855074
					0.593787	0.914508					0.990434	1.10491	0.607276	1.20814	1.46708	1.35512		0.781086										0.792795
					0.679661	0.819615					1.0495	1.33467	0.622463	1.02947	1.00634	1.25677		1.52587										0.898674
					0.850403	0.782121					1.17945	1.47329	0.61495	0.856983	0.675899	1.25513		1.12027										0.952134
					1.04393	0.815566					1.28967	1.3089	0.629494	0.739863	0.497901	1.02501		0.913368										0.773719
					1.21984	0.859388					1.30896	1.0204	0.686835	0.709583	0.564491	0.722856		0.895627										0.644551
					0.693907	0.891292					1.22378	0.781846	0.746042	0.772829	0.753449	0.536127		0.96981										0.54991
					0.651867	0.922428					1.10289	0.865133	0.756054	0.898237	0.951139	0.545876		1.03536										0.528468
					0.62842	0.94392					0.975366	0.928346	0.680204	1.62567	1.09016	0.671823		1.01078										0.879808
					0.656848	0.945857					0.873585	1.12048	0.655146	1.55179	0.894144	0.811731		0.891827										0.789171
					0.690519	0.948853					0.782977	1.46039	0.963613	1.30864	0.665303	0.940325		0.773692										0.660824
					0.630922	1.03506					0.720914	1.59804	0.928401	1.19552	0.516572	1.00842		0.727638										0.56701
					0.594615	1.23072					0.884585	1.28021	1.03476	1.24022	0.496397	1.22364		0.716228										0.533593
					0.603451	1.45878					0.998459	0.975649	1.10667	1.45771	0.607599	0.78266		1.34166										0.559548
					0.630492	1.62024					1.01648	0.726868	1.19073	1.51465	0.844436	0.601764		1.03415										0.829694
					0.702314	1.64905					0.959718	0.72248	0.874502	1.46543	1.1717	0.56361		0.887182										0.766741
					0.688404	0.786656					0.948169	0.861355	0.663906	1.43143	1.49975	0.577149		0.882803										0.66199
					0.65214	0.631596					1.00868	1.16207	0.547646	1.29879	1.64425	0.597118		0.958672										0.583466
					0.62188	0.730545					1.12334	1.61821	0.566606	1.17725	1.38931	0.649359		1.0178										0.551878
					0.599974	0.930156					1.20927	1.70346	0.596023	1.02723	1.07083	0.805941		0.973441										0.572871
					0.598189	1.14624					1.22156	1.30375	0.577917	0.865915	0.675412	1.08296		0.841488										0.614062
					0.610947	1.29679					1.14927	0.913126	0.576206	0.745957	0.497553	1.37066		0.729528										0.644007
					0.693546	1.32199					1.05178	0.650463	0.645394	0.700545	0.538541	1.48209		0.70595										0.648949
					0.766907	1.23184					0.951848	0.509766	0.737828	0.744141	0.726185	1.39061		0.754447										0.797175
					0.711799	1.04058					0.861606	0.615757	0.721121	0.853619	0.901997	1.2911		1.00109										0.736494
					0.652541	0.921257					0.783753	0.843631	0.756429	1.54779	1.03546	1.25624		0.878679										0.668199
					0.627512	0.810127					0.744989	1.29342	0.639712	1.35456	0.919963	1.15222		0.861563										0.616552
					0.611125	0.776728					0.624664	1.83948	0.942319	1.17464	0.622354	0.885214		0.900783										0.594876
					0.604998	0.792985					0.873284	1.77436	0.91944	1.18145	0.508832	0.603056		0.927176										0.603452
					0.609208	0.815366					0.967521	1.26498	1.04501	1.31595	0.544387	0.506549		0.883406										0.618731
					0.636309	0.823247					1.00984	0.846815	1.12118	1.55641	0.712881	0.605988		0.794089										0.635773
					0.684688	0.831589					0.970597	0.572364	1.22167	1.62691	0.987805	0.793813		0.719391										0.632411
					0.74992	0.845909					0.974927	0.456292	0.975316	1.51364	1.32622	0.992701		0.715905										0.625318
					0.672529	0.872842					1.02342	0.580389	0.663359	1.33655	1.61708	1.11982		0.890501										0.713518
					0.631532	0.960512					1.08541	0.910955	0.532932	1.13999	1.60555	1.04736		0.849669										0.708935
					0.629387	1.15859					1.11866	1.53729	0.548923	1.10902	1.43191	0.691215		0.839969										0.695851
					0.635189	1.43656					1.11236	2.06488	0.579512	0.996922	1.01096	0.573039		0.825283										0.663879
					0.641355	1.67239					1.06793	1.79798	0.561467	0.860481	0.633721	0.565475		0.799181										0.629872
					0.642121	1.78216					0.997578	1.21227	0.551168	0.739611	0.48947	0.585984		0.758953										0.615815
					0.650618	1.68109					0.919302	0.780372	0.621035	0.68675	0.558141	0.652079		0.723659										0.615937
					0.671418	0.824027					0.843221	0.500998	0.678103	0.716405	0.706218	0.770626		0.739307										0.62534
					0.719833	0.657658					0.769284	1.00744	0.799997	0.82667	0.852956	0.98647		0.911849										0.625536
					0.797505	0.739211					0.707099	0.531296	0.792867	0.957768	0.960655	1.29367		0.858871										0.625268
					0.733221	0.919314					0.625868	0.465073	0.9436	1.41673	0.805709	1.53065		0.812068										0.727256
					0.637256	1.09542					0.873498	0.62415	0.908017	1.1551	0.576854	1.51877		0.774097										0.797574
					0.625568	1.20142					0.968539	1.05864	1.01052	1.06729	0.496926	1.33907		0.749996										0.809818
					0.65759	1.19459					1.04588	1.80874	1.06561	1.17852	0.585688	1.20434		0.747237										0.727463
					0.689517	1.10352					1.03309	2.19344	1.151	1.41474	0.830688	1.12194		0.752302										0.662196
					0.707274	0.978397					1.01745	1.7491	0.952555	1.61259	1.18865	0.958615		0.798581										0.602462
					0.693851	0.858261					1.02831	1.14626	0.677508	1.60071	1.57244	0.699649		0.871713										0.599715
					0.666504	0.778371					1.04685	0.718846	0.542144	1.4145	1.78563	0.520413		0.832212										0.615612
					0.657463	0.747049					1.05126	1.1673	0.534599	1.23015	1.67927	0.534025		0.779131										0.621741
					0.695565	0.747941					1.04752	0.703136	0.555653	1.11786	1.3286	0.703573		0.7524										0.615384
					0.779226	0.7501					1.03101	0.497777	0.546147	1.04504	0.895938	0.95694		0.761051										0.917255
					0.680728	0.74563					0.986241	0.522986	0.562325	0.95544	0.57143	1.06686		0.798344										0.927721
					0.618887	0.743021					0.911207	0.747207	0.646757	0.827671	0.482684	1.4516		0.903573										0.82939
					0.636556	0.758034					0.821032	1.28154	0.759538	0.70693	0.566617	0.899604		0.849258										0.689497
					0.695418	0.833442					0.733727	2.01492	0.836909	0.655463	0.699341	0.651299		0.797347										0.595532
					0.755296	1.02698					0.641322	2.14397	0.83221	0.693327	0.813942	0.579704		0.809586										0.582708
					0.756854	1.33408					0.567291	1.62185	0.916323	0.81909	0.875952	0.589142		0.9898										0.606335
					0.750918	1.64547					0.888974	0.989375	0.94465	0.990953	0.785998	0.643059		1.05018										0.612399
					0.690737	1.83862					0.967526	0.669204	0.993803	1.39711	0.546806	0.747753		0.925405										0.599238
					0.65697	1.85319					1.06979	1.36627	1.00149	1.28739	0.483433	0.939023		0.839478										0.970923
					0.684159	0.711571					1.07824	0.878783	0.890165	1.00886	0.600763	1.22923		0.779767										0.907294
					0.769114	0.754652					1.02321	0.552071	0.707578	0.995028	0.912021	1.5575		1.07172										0.857251
					0.834244	0.882418					0.991369	0.498156	0.583935	1.183	1.37246	1.71769		0.894893										0.706419
					0.65292	1.00206					0.983851	0.628707	0.539471	1.46031	1.78849	1.58608		0.772433										0.598503
					0.611136	1.05629					0.989149	0.965635	0.519836	1.62097	1.86729	1.33745		0.718687										0.573708
					0.64553	1.0207					1.00356	1.56301	0.521981	1.51387	1.58617	1.14268		0.719298										0.589904
					0.722111	0.935899					1.01019	2.06428	0.591768	1.27805	1.1577	0.975762		0.780278										0.597415
					0.803749	0.848496					0.973045	1.81676	0.725622	1.11321	0.756646	0.76439		1.32105										0.584469
					0.839409	0.758575					0.892034	1.41776	0.856931	1.03937	0.518597	0.565593		1.13494										0.857924
					0.797081	0.733642					0.783825	0.976224	0.929632	0.997562	0.489795	0.50563		0.956892										0.884207
					0.713947	0.711603					0.681171	0.62624	0.904235	0.921012	0.58351	0.603769		0.77223										0.823898
					0.665924	0.703113					0.58885	1.61859	0.969596	0.780285	0.701643	0.817335		0.664892										0.71155
					0.683862	0.695776					0.913701	1.19941	0.892373	0.653595	0.789137	1.11841		0.667295										0.616855
					0.765673	0.687747					0.990999	0.720119	0.850523	0.614534	0.800195	1.39472		0.713214										0.581639
					0.882846	0.680109					1.07804	0.498474	0.845464	0.682209	0.757433	1.2251		0.791062										0.58201
					1.09606	0.71135					1.06195	0.532937	0.829536	0.829807	0.539911	0.790236		1.27228										0.579928
					0.788157	0.837153					0.981717	0.791411	0.771338	1.01568	0.474159	0.644137		1.20308										0.545469
					0.637654	1.12648					0.92675	1.28894	0.679731	1.34129	0.58704	0.609808		1.02825										0.720118
					0.608484	1.48899					0.912265	1.85725	0.58476	1.15899	0.9149	0.62454		0.857493										0.744449
					0.649757	1.77307					0.933058	1.96083	0.504935	0.922721	1.39665	0.693263		0.701434										0.715225
					0.72934	1.88969					0.959567	1.45765	0.497931	0.974721	1.75719	0.858646		0.64038										0.663065
					0.823537	0.81469					0.96112	1.1591	0.62243	1.14069	1.72064	1.14266		0.685556										0.623973
					0.864909	0.798375					0.922249	0.840639	0.825677	1.41269	1.35285	1.51596		0.739869										0.600608
					0.823419	0.866054					0.841532	0.57197	0.996484	1.58487	0.928128	1.84088		0.798352										0.578063
					0.731889	0.924627					0.736484	1.52411	1.07502	1.3882	0.626088	1.89543		1.20813										0.531032
					0.67245	0.932281					0.635409	1.34938	1.00839	1.12718	0.495478	1.65652		1.07425										0.660352
					0.681592	0.878495					0.562883	0.960577	1.10783	0.98417	0.508875	1.32218		0.907794										0.727051
					0.754339	0.798207					0.965561	0.624242	0.887099	0.9491	0.601848	1.05808		0.779803										0.736092
					0.851805	0.736611					0.946286	0.492477	0.762902	0.948093	0.710662	0.829143		0.691061										0.712584
					1.01757	0.706645					1.0329	0.610405	0.75119	0.888745	0.772072	0.626428		0.689561										0.66426
					0.743735	0.689109					1.0753	1.01377	0.804554	0.740293	0.753373	0.524686		0.739177										0.598002
					0.624393	0.673547					1.00915	1.67083	0.849522	0.605217	0.549383	0.555834		0.764995										0.756425
					0.608155	0.660096					0.906689	2.06451	0.802364	0.575043	0.476621	0.696072		0.798043										0.833642
					0.649555	0.65694					0.849413	1.76782	0.660841	0.65987	0.557975	0.93285		1.16507										0.841096
					0.726759	0.653776					0.860858	1.25919	0.526131	0.828935	0.837659	1.28324		0.921857										0.801827
					0.817186	0.653205					0.901469	0.893494	0.503373	1.00015	1.22633	1.08518		0.789021										0.902204
					0.865652	0.698745					0.927738	0.665755	0.650327	1.29805	1.36578	0.725163		0.723108										0.967615
					0.827756	0.870507					0.912238	1.21702	0.900293	1.05806	1.29294	0.641932		0.718654										0.976875
					0.738963	1.19842					0.866004	1.1092	1.11943	0.884077	1.03954	0.641253		0.752829										0.595576
					0.650123	1.54369					0.793479	0.976397	1.22568	0.944066	0.712215	0.677912		0.769982										0.58739
					0.677917	1.72878					0.704379	0.756531	1.018	1.26334	0.534091	0.781008		0.765888										0.612917
					0.718205	0.900846					0.617668	0.550588	0.939263	1.51042	0.49148	1.00815		0.777496										0.64661
					0.82329	0.892312					0.560553	0.508659	0.76213	1.49946	0.53481	1.34086		0.781542										0.681592
					0.940294	0.9013					0.931608	0.71961	0.752378	1.24796	0.618951	1.78169		0.685151										0.635527
					0.697267	0.875086					0.983217	1.25735	0.83453	1.00898	0.702284	1.96849		0.685029										0.59475
					0.610945	0.807877					1.07898	1.96643	0.924628	0.882112	0.773693	1.95394		0.739347										0.581292
					0.608137	0.720384					1.06571	2.07965	0.904122	0.859411	0.569008	1.59828		0.773562										0.580434
					0.652434	0.659789					0.944656	1.53332	0.750075	0.87517	0.487705	1.22432		0.767156										0.597327
					0.725063	0.648491					0.824775	1.00149	0.586467	0.835657	0.532009	0.923181		0.742626										0.629498
					0.809551	0.650461					0.779737	0.673355	0.544497	0.708929	0.72141	0.699923		0.667598										0.708827
					0.855019	0.643522					0.825477	1.11799	0.670375	0.586951	0.965323	0.577		0.610063										0.646654
					0.8221	0.62586					0.89574	0.904061	0.91021	0.561552	1.08498	0.545107		0.657647										0.618073
					0.729515	1.0502					0.92533	0.81639	1.16218	0.652156	0.992875	0.648895		0.727252										0.596047
					0.66699	0.975804					0.902317	0.738749	1.31658	0.824194	0.758102	0.745189		0.760645										0.571611
					0.669748	0.941085					0.84625	0.611534	0.858826	0.972275	0.556478	1.0583		0.749075										0.55768
					0.726929	0.902471					0.775993	0.499559	0.845906	1.29121	0.477724	1.31669		0.726055										0.566415
					0.801283	0.82729					0.704073	0.539571	0.91189	0.987005	0.493748	1.03648		0.584214										0.600601
					0.87425	0.715519					0.620864	0.82746	0.975687	0.890683	0.551064	0.707243		0.628204										0.758569
					0.665975	1.09833					0.891099	1.42851	0.951414	1.05996	0.613517	0.641753		0.692077										0.670552
					0.59744	1.04123					1.01351	2.01275	0.821783	1.34524	0.801683	0.666099		0.720658										0.622939
					0.608415	1.00046					1.11138	1.84884	0.668743	1.52489	0.591342	0.750102		0.731582										0.60213
					0.659495	0.936578					1.0412	1.26372	0.605149	1.4142	0.509304	0.919608		0.596605										0.586054
					0.736961	1.14805					0.889514	0.809752	0.669317	1.16939	0.525096	1.20213		0.636207										0.558982
					0.817547	0.949151					0.764331	0.513846	0.855931	0.979601	0.621101	1.56549		0.666927										0.536317
					0.850056	0.849608					0.722735	1.08907	1.04871	0.829813	0.702116	1.84142		0.71941										0.542962
					0.808772	0.852253					0.787641	0.896215	1.30413	0.822043	0.757859	2.04291		1.16401										0.581843
					0.696326	0.922316					0.886245	0.76737	1.00807	0.80254	0.686989	1.71251		1.09166										0.653918
					0.662437	1.24439					0.939697	0.691219	1.00788	0.765437	0.565552	1.39715		1.03736										0.813826
					0.665845	1.1248					0.927268	0.624153	0.998616	0.680359	0.469093	1.025		1.06322										0.701121
					0.719221	0.947858					0.880078	0.536814	0.96379	0.59392	0.444213	0.763831		1.03329										0.641876
					0.756378	0.800476					0.810197	0.485338	0.878757	0.580945	0.474366	0.624927		1.03465										0.611634
					0.838786	0.725511					0.725983	0.582683	0.754609	0.670436	0.533241	0.603001		0.972123										0.597818
					0.651778	0.744338					0.611014	0.866605	0.664123	0.829014	0.927878	0.607989		0.972288										0.575209
					0.59127	0.827548					0.903614	1.44715	0.66539	0.958071	0.635663	0.782765		1.04313										0.548457
					0.606492	0.940057					1.0251	1.76303	0.793781	1.31373	0.544187	0.95183		1.04889										0.529728
					0.664489	1.05659					1.10027	1.46436	1.02719	0.983529	0.540132	1.13478												0.537011
					0.749226	1.04163					1.00438	0.999145	1.23129	0.951774	0.566328	1.6671												0.574406
					0.829265	0.996817					0.865494	0.657959	1.14849	1.16686	0.572312	1.05511												0.638426
					0.855301	0.90822					0.741243	0.959432	1.0659	1.45362	0.544841	0.706929												0.739347
					0.801714	0.80252					0.686864	0.884418	1.00511	1.55316	0.503628	0.631889												0.659162
					0.711598	0.704142					0.736497	0.817791	0.972355	1.38925	0.458418	0.68124												0.626327
					0.657692	0.661413					0.857356	0.739566	0.923287	1.19184	0.42063	0.837011												0.610891
					0.665864	0.682434					0.948007	0.658683	0.799255	1.03113	0.407069	1.08403												0.595587
					0.720163	0.757164					0.967419	0.583654	0.722145	0.981988	0.420445	1.36241												0.573985
					0.78636	0.862473					0.941126	0.517068	0.689348	0.88469	0.722672	1.62535												0.550247
					0.843686	0.971671					0.879169	0.513831	0.783473	0.790352	0.602302	1.80514												0.536072
					0.657465	0.901371					0.768467	0.641149	0.994625	0.718571	0.573795	1.77223												0.5424
					0.594253	0.869613					0.939058	0.941415	1.18789	0.651275	0.560374	1.48817												0.571278
					0.604931	0.8457					1.02516	1.30794	1.05714	0.602895	0.512661	1.11853												0.626767
					0.665191	0.80876					1.05454	1.37297	0.999508	0.619994	0.446153	0.824899												0.693122
					0.757429	0.76049					0.973906	1.09131	0.980361	0.713845	0.398982	0.658961												0.706498
					0.834847	0.712574					0.85437	0.773444	0.95403	0.871111	0.39069	0.62292												0.631728
					0.850957	0.671415					0.744663	0.52786	0.883411	1.31495	0.377441	0.684476												0.611454
					0.753238	0.654261					0.671969	0.826247	0.796394	1.03193	0.876706	0.795089												0.604512
					0.704075	0.668085					0.692957	0.831526	0.767298	1.05251	0.697899	0.935664												0.594891
					0.660677	0.680163					0.810841	0.825719	0.866808	1.29984	0.631872	1.08447												0.577486
					0.677945	0.78666					0.941388	0.755599	1.06475	1.57897	0.58626	1.06008												0.558813
					0.730048	0.982511					0.999995	0.651654	0.973612	1.62397	0.506251	0.693348												0.54992
					0.794986	0.862033					1.00016	0.56324	0.960826	1.46405	0.393533	0.613353												0.554322
					0.876006	0.786786					0.958727	0.531695	0.9489	1.33404	0.323305	0.690546												0.576048
					0.675495	0.753217					0.861623	0.572534	0.914195	1.27604	0.832575	0.911417												0.62192
					0.601947	0.728969					0.967594	0.704254	0.88336	1.19796	0.696831	1.18756												0.681211
					0.60823	0.705749					1.02387	0.866739	0.929874	0.98539	0.605337	1.38748												0.716922
					0.66118	0.692145					1.01496	1.08799	1.07313	0.861518	0.741487	1.47746												0.70904
					0.743629	0.692925					0.942031	1.02636	1.21404	0.724847	0.841871	1.484												0.62761
					0.811788	0.691383					0.831393	0.820193	1.28555	0.636712	0.762108	1.37348												0.593822
					0.819158	0.710266					0.741345	0.605263	1.24029	0.607738	0.65779	1.14208												0.586199
					0.762311	0.704815					0.66941	0.837379	1.13333	0.655282	0.625381	0.877982												0.580476
					0.698766	0.680931					0.664332	0.817528	1.01131	0.779527	0.674598	0.69386												0.571781
					0.676066	0.735204					0.76072	0.861533	1.02421	0.942348	0.795848	0.63754												0.560695
					0.702156	0.804987					0.912628	0.858544	1.01947	1.30645	0.860453	0.694299												0.554481
					0.725804	1.13878					1.01167	0.727533	1.15295	1.08733	0.694048	0.81003												0.561872
					0.922633	1.04154					1.04102	0.616961	1.3095	1.14875	0.595863	0.943894												0.582676
					0.70436	0.915302					1.03103	0.533006	1.40113	1.40941	0.555795	1.05426												0.608722
					0.616317	0.802704					0.944359	0.552079	1.3895	1.67799	0.575172	1.01185												0.669102
					0.610865	0.732078					1.0166	0.633324	1.30675	1.71436	0.635472	0.661165												0.685618
					0.651197	0.696537					1.00914	0.746672	1.20927	1.59119	0.729015	0.595797												0.665138
					0.713842	0.681836					0.92796	0.853474	1.11633	1.51416	0.76545	0.699516												0.627489
					0.759288	0.675013					0.820269	0.871343	0.938444	1.40499	0.63335	0.932927												0.582261
					0.762402	0.695378					0.743266	0.785051	0.798859	1.33063	0.569539	1.15967												0.565235
					0.72678	0.747263					0.674982	0.642102	1.40835	1.21334	0.544244	1.23773												0.561232
					0.695689	0.801334					0.65024	0.483172	1.33991	0.978088	0.537734	1.20198												0.55599
					0.700927	0.8185					0.720381	1.16949	1.22692	0.777629	0.556444	1.12233												0.548311
					0.738086	0.782798					0.87576	0.894114	1.21048	0.650674	0.619499	1.01539												0.546962
					0.793887	0.735081					1.00667	0.810031	1.26502	0.613678	0.743172	0.869989												0.560066
					0.983856	0.711148					1.06239	0.865993	1.31844	0.683965	0.920695	0.724632												0.593105
					0.747006	0.735245					1.07984	0.920954	1.33653	0.841149	0.702057	0.652321												0.632398
					0.635137	1.04993					0.840163	0.884791	1.35424	1.02337	0.615183	0.694947												0.655851
					0.613594	1.01143					0.916896	0.725302	1.37976	1.27641	0.611122	0.828762												0.650647
					0.632835	0.956684					0.988621	0.549451	1.38421	1.11764	0.609323	0.987024												0.643089
					0.667907	0.868916					0.963463	0.496056	1.33826	1.21198	0.573567	1.05491												0.579606
					0.68875	0.770566					0.865195	0.543234	1.24695	1.48317	0.546929	0.951078												0.554249
					0.695999	0.706581					0.781914	0.668278	1.15563	1.74031	0.574636	0.635704												0.547479
					0.687539	0.680792					0.700336	0.739157	1.0858	1.78251	0.68183	0.598907												0.546018
					0.691955	0.67949					0.655885	0.752084	1.00978	1.61268	0.825608	0.712602												0.537405
					0.728849	0.678065					0.715034	0.711122	0.896744	1.62764	0.667028	0.900591												0.536724
					0.786534	0.760707					0.871289	0.633685	0.7475	1.58175	0.645202	1.0352												0.563643
					0.843056	0.856548					1.01479	0.532747	1.35863	1.47814	0.720197	1.03144												0.612359
					1.06475	0.943688					1.06848	0.950119	1.25609	1.28834	0.770152	0.942514												0.650779
					0.801903	0.949195					1.09179	0.783262	1.24305	1.05728	0.70996	0.855057												0.654198
					0.660395	0.874666					0.740647	0.81546	1.30956	0.836929	0.607523	0.787042												0.615964
					0.59677	0.776027					0.789859	0.915478	1.40639	0.700461	0.570678	0.720067												0.608838
					0.613031	0.711344					0.966442	0.969923	1.46075	0.644058	0.638354	0.666834												0.56717
					0.626738	0.714168					1.04667	0.891086	1.45123	0.717806	0.800059	0.682652												0.558288
					0.63789	1.00115					0.983639	0.69565	1.40204	0.899098	0.968948	0.760421												0.550656
					0.64395	0.936686					0.866947	0.532421	1.33392	1.22268	0.707217	0.96218												0.539156
					0.659236	0.91767					0.75253	0.491832	1.24291	1.14663	0.62821	1.11819												0.545517
					0.684193	0.890438					0.695933	0.558359	1.14063	1.27397	0.679733	0.96638												0.591996
					0.7696	0.829639					0.765978	0.658619	1.05855	1.54202	0.852504	0.666972												0.658306
					0.842139	0.755519					0.921818	0.692252	1.00724	1.77181	0.988919	0.645624												0.701252
					0.892606	0.706547					1.0418	0.664663	0.966204	1.80298	0.934111	0.737963												0.677085
					0.879176	0.698391					1.0685	0.617094	0.914649	1.7101	0.71392	0.854291												0.594555
					0.691703	0.719187					1.06396	0.559535	0.863295	1.60735	0.598772	0.908029												0.634811
					0.605006	0.772145					0.681234	0.482412	0.835032	1.50244	0.590712	0.868304												0.6095
					0.598728	0.822902					0.927358	1.0953	1.3293	1.37496	0.722068	0.788924												0.583335
					0.601311	0.991182					1.12798	0.810992	1.24895	1.2219	1.08939	0.715482												0.552937
					0.606727	1.07787					1.10027	0.750631	1.22674	1.03526	0.820866	0.67214												0.57429
					0.618975	1.04874					0.951427	0.821024	1.19676	0.859001	0.638749	0.652814												0.651106
					0.661864	0.92604					0.808472	0.931923	1.39525	0.732669	0.578542	0.670407												0.74696
					0.740094	0.796836					0.759987	0.9933	1.45732	0.693003	0.689828	0.687408												0.789117
					0.83713	0.712517					0.852492	0.922173	1.41282	0.766677	0.954574	0.791705												0.744284
					0.915903	0.700792					0.995391	0.754612	1.29317	0.957266	1.20529	0.743989												0.569134
					0.941702	0.991758					1.07511	0.605774	1.15745	1.13422	1.2041	0.787654												0.619436
					0.949604	0.894281					1.05823	0.533476	1.03698	1.17184	0.938467	0.835538												0.740164
					0.723646	0.853547					1.02376	0.550977	0.938191	1.36105	0.664027	0.841909												0.864328
					0.624429	0.842866					0.727204	0.611326	0.878539	1.6212	0.560516	0.798642												0.917078
					0.604347	0.826326					1.03416	0.6364	0.860231	1.79843	0.645121	0.7297												0.853292
					0.606609	0.786338					1.13425	0.619979	0.86058	1.7681	0.876606	0.682225												0.838635
					0.611133	0.741995					1.0029	0.588772	0.874454	1.63595	0.935587	0.585627												0.990843
					0.637801	0.72331					0.85323	0.553402	0.899718	1.49848	0.720895	0.676719												1.05006
					0.71554	0.744518					0.827482	1.18241	0.90965	1.34363	0.568945	1.00676												0.979841
					0.835584	0.796104					0.93764	1.09081	0.81607	1.18744	0.526343	0.898286												1.09855
					0.956163	0.874601					1.04976	0.900163	1.26921	1.05492	0.669021	0.872222												1.16477
					1.02963	0.987588					1.07424	0.773732	1.18908	0.938401	1.00329	0.863941												0.653455
					1.00159	1.11333					1.01713	0.754301	1.0545	0.825633	1.37174	0.786073												0.653481
					1.02215	1.16275					0.944825	0.812608	1.17972	0.766999	1.47138	0.805993												0.644491
					0.761363	1.07559					0.76587	0.916173	1.25429	0.750548	1.1687	0.786153												0.649444
					0.647667	0.9168					1.04411	1.00289	1.28418	0.840243	0.761538	1.09127												0.641859
					0.631838	0.773597					1.02985	0.99484	1.20237	1.07008	0.559492	0.993399												0.614995
					0.636	0.695988					0.924976	0.883417	1.04509	1.1903	0.583414	0.938645												0.631539
					0.645971	0.69248					0.939202	0.726233	0.897398	1.41227	0.773925	0.820307												0.666904
					0.700965	0.948834					1.02771	0.60207	0.796565	1.64831	1.0372	0.734526												0.650235
					0.829985	0.926702					1.07299	0.53934	0.73391	1.73869	0.822679	0.721553												0.671834
					0.997197	0.874424					1.03903	0.560558	0.697219	1.51709	0.652877	0.740142												0.681436
					1.13174	0.820231					0.953856	0.602259	0.69063	1.47678	0.527371	0.766381												0.660095
					1.17561	0.786523					0.826629	0.621174	0.732351	1.33741	0.497431	0.728038												0.632021
					1.07315	0.776128					0.827483	0.623349	0.814723	1.16975	0.646389	0.730512												0.614192
					0.831629	0.765936					1.05587	1.1566	0.901822	1.00086	1.00494	0.75139												0.734365
					0.704615	0.716682					1.14561	0.999683	0.918316	0.885776	1.37819	0.771223												0.662562
					0.677918	0.738637					1.18194	0.869321	0.82184	0.834447	1.69792	0.780349												0.678473
					0.678996	0.761101					1.16771	0.811982	1.19764	0.811073	1.39909	0.725807												0.730152
					0.709822	0.819972					1.10341	0.771777	1.07715	0.793311	0.883101	0.714251												0.760422
					0.811096	0.901138					1.00961	0.756579	0.996647	0.762685	0.586967	0.719066												0.736499
					0.994406	1.00197					0.901374	0.790286	0.994557	1.02521	0.553025	0.723908												0.677846
					1.19607	1.11796					1.60157	0.885695	1.00987	1.16376	0.69483	0.72562												0.627246
					1.32563	1.20569					1.3906	0.953646	0.969226	1.30343	0.935014	0.730481												0.608324
					1.31156	1.18337					1.19738	1.07431	0.845376	1.44168	0.89624	0.951228												0.834126
					0.726972	1.0335					1.04062	1.00896	0.721072	1.4327	0.733143	0.846151												0.704251
					0.731106	0.854677					0.879043	0.839262	0.676531	1.40393	0.608431	0.730191												0.678787
					0.797869	0.720769					1.37425	0.641105	0.693429	1.27574	0.518264	0.70227												0.737378
					0.959045	0.664282					1.14111	0.516401	0.679088	1.17408	0.502052	0.682221												0.834116
					1.18657	0.683279					0.870512	0.515377	0.604316	1.03567	0.640765	0.681058												0.860166
					1.39455	0.836673					1.87837	0.586398	0.561928	0.877505	0.984762	0.689729												0.876879
					1.48225	0.823813					1.02416	0.657376	0.623835	0.780037	1.48516	0.671973												0.787827
					1.39672	0.837029					0.908669	0.713797	0.766602	0.764285	1.83121	0.66942												0.693097
					0.92328	0.82505					0.824932	1.00533	0.885747	0.789032	1.59065	0.660773												0.631173
					1.13584	0.783661					0.78635	0.830886	0.906741	0.827379	1.01231	0.686961												0.769131
					1.37132	0.744884					0.773972	0.786339	0.832215	0.903629	0.636619	1.16752												0.702746
					1.5507	0.725606					0.770955	0.790618	1.1702	1.01741	0.52932	0.977658												0.727413
					1.57651	0.700488					0.793813	0.765443	0.965695	1.10143	0.63938	0.769701												0.831322
					1.39588	0.736133					1.00138	0.740289	0.796355	1.23219	0.846826	0.704352												0.973549
					1.28276	0.766361					0.916083	0.760515	0.802977	1.32024	0.783411	0.652928												1.07909
					1.48354	0.826007					0.808908	0.868228	0.775153	1.27915	0.663064	0.631918												1.07845
					1.59785	0.919106					0.723452	1.03209	0.701164	1.06073	0.584855	0.633957												0.905646
					0.622588	1.03236					0.659681	1.12952	0.597879	0.992103	0.531701	0.660066												0.806225
					0.738079	1.14665					0.644601	1.07204	0.569222	1.03251	0.532452	0.677139												0.668489
					0.882861	1.23831					0.692803	0.871204	0.656023	0.91906	0.655511	0.669728												0.596568
					1.03744	1.25681					0.795892	0.630595	0.752458	0.830662	0.96172	0.648515												0.881145
					0.572055	1.15334					0.889997	0.48308	0.731878	0.74894	1.44383	0.655332												0.734687
					0.609645	0.960442					0.78857	0.490566	0.600421	0.752158	1.85568	0.718543												0.721744
					0.688982	0.782681					0.847993	0.595936	0.51613	0.80275	1.617	1.46987												0.796535
					0.802684	0.666066					0.877948	0.728072	0.591136	0.888059	1.12751	1.21067												0.935776
					0.93915	0.628086					0.86477	0.853069	0.745987	1.01743	0.698606	0.937537												1.12163
					1.10092	0.849236					0.82879	0.878258	0.852786	1.02164	0.554813	0.761774												1.27888
					0.593758	0.781823					0.790334	0.757152	0.869189	1.08113	0.609376	0.668093												1.30148
					0.59161	0.805331					0.750968	0.774094	0.829847	1.11045	0.786483	0.616563												1.09625
					0.624309	0.844315					0.741448	0.785166	1.18106	1.05421	0.714672	0.59053												0.867986
					0.684692	0.84772					0.786236	0.746798	0.892531	0.962523	0.617299	0.607874												0.699006
					0.767415	0.798461					0.864516	0.714075	0.745404	0.925912	0.553146	0.661709												0.585543
					0.873876	0.734336					0.956713	0.720243	0.697293	0.937485	0.548539	0.719297												0.829883
					1.0123	0.690378					1.02543	0.912575	0.678106	0.866696	0.569146	0.738636												0.730045
					1.15563	0.723541					0.866815	1.09677	0.620263	0.853091	0.681983	0.712373												0.751285
					0.65058	0.772018					0.904524	1.169	0.551512	0.798688	0.946658	0.69165												0.855701
					0.592048	0.836331					0.924051	1.05739	0.566777	0.80933	1.38338	0.719073												1.02157
					0.61346	0.926036					0.933643	0.817542	0.680334	0.868009	1.78926	0.793468												1.23169
					0.670858	1.00795					0.954476	0.577633	0.726975	0.916042	1.73023	1.68867												1.41449
					0.741655	1.13059					0.974509	0.467027	0.752716	0.967112	1.21068	1.54398												1.44919
					0.800005	1.28481					0.971666	0.503753	0.629425	0.958881	0.757276	1.16434												1.273
					0.855334	1.32531					0.959337	0.638261	0.572431	0.941763	0.566311	0.843413												0.976875
					0.937563	1.25993					0.960389	0.808244	0.649149	0.881807	0.589574	0.673104												0.717225
					1.06097	1.08985					0.984447	0.807035	0.757528	0.81627	0.75101	0.6084												0.582008
					0.622786	0.891357					1.02957	0.732487	0.80614	0.812709	0.998173	0.594339												0.559951
					0.581995	0.736007					1.09994	0.761534	0.807628	0.875617	0.673035	0.607543												0.74995
					0.635982	0.644764					0.865747	0.758193	0.775501	0.841425	0.585065	0.6484												0.771038
					0.737013	0.623462					1.01421	0.715178	1.18989	0.929527	0.547478	0.721658												0.875713
					0.831375	0.870854					1.04557	0.711784	0.858651	0.922703	0.551525	0.807334												1.03975
					0.874972	0.781567					1.04589	0.828249	0.706526	0.942577	0.601172	0.85483												1.24379
					0.876528	0.79072					1.07078	1.05038	0.666554	0.935596	0.720451	0.830238												1.42276
					0.891251	0.85962					1.10021	1.22837	0.664013	0.880239	0.969899	0.774565												1.45738
					0.962757	0.926953					1.13511	1.21056	0.632147	0.826491	1.3634	0.749136												1.28041
					1.07182	0.929563					1.14665	0.998763	0.610087	0.771348	1.71728	0.775331												0.979983
					0.773243	0.854029					1.12454	0.718717	0.625283	0.725921	1.69353	1.73976												0.723605
					0.602635	0.761157					1.08386	0.530754	0.690036	0.731873	1.25625	1.8209												0.586792
					0.581229	0.729704					1.06953	0.496122	0.741495	0.795004	0.798029	1.51182												0.551975
					0.657132	0.776982					1.08395	0.581053	0.736994	0.917411	0.574986	1.03718												0.778632
					0.786159	0.865508					1.16661	0.723003	0.706088	1.25978	0.575704	0.714428												0.766565
					0.906045	0.957112					0.674027	0.729119	0.720343	1.21462	0.72183	0.567422												0.843058
					0.943709	1.05811					0.889047	0.710954	0.769682	1.13392	0.943831	0.545916												0.978449
					0.895851	1.18688					1.02156	0.708215	0.784626	1.07834	0.656518	0.602578												1.15397
					0.849821	1.24451					1.05599	0.694064	0.765339	1.07891	0.553851	0.686703												1.30564
					0.883415	1.378					1.09469	0.687516	0.713961	1.213	0.514888	0.754782												1.32343
					0.980681	1.33714					1.13436	0.760263	1.16886	1.38487	0.539402	0.839665												1.18864
					0.731178	1.19803					1.16549	0.972558	0.852296	1.48978	0.62818	0.907738												0.877402
					0.601985	1.01164					1.18436	1.24582	0.708452	1.46353	0.792864	0.956471												0.706113
					0.591939	0.84823					1.174	1.37497	0.669784	1.3302	1.06632	0.941103												0.578263
					0.669361	0.73535					1.12413	1.23813	0.670468	1.16821	1.43911	0.867087												0.542147
					0.799762	0.674816					1.05937	0.924138	0.670181	1.04837	1.72193	0.787293												0.794616
					0.922019	0.662256					1.024	0.636712	0.663122	0.985632	1.66214	0.752051												0.753586
					0.954079	0.791476					1.0351	0.519271	0.612781	1.36195	1.26523	0.772417												0.777207
					0.888471	0.780454					1.13172	0.57579	0.64454	1.30927	0.818344	1.78797												0.868412
					0.813471	0.850959					0.7698	0.711624	0.652028	1.3533	0.573295	1.78252												1.00341
					0.810045	0.964524					0.843285	0.859797	0.705938	1.48786	0.562271	1.3434												1.12275
					0.885844	1.05923					0.875595	0.702092	0.810732	1.63728	0.693276	0.879208												1.15491
					0.986451	1.04926					0.920228	0.649315	0.890234	1.66532	0.883948	0.606135												1.03881
					0.97051	0.928281					1.00249	0.632195	0.883152	1.5128	0.652951	0.495636												0.842579
					0.697377	0.812515					1.08297	0.67438	0.825143	1.26097	0.528736	0.513395												0.665421
					0.608055	0.796817					1.13156	0.823178	0.720433	1.04227	0.479486	0.640581												0.569879
					0.60625	0.884902					1.12621	1.09041	0.592321	0.926045	0.518425	0.807581												0.548293
					0.666801	1.00956					1.07726	1.34606	0.830687	0.957527	0.660602	0.930118												0.756477
					0.775551	1.11588					0.984464	1.38944	0.746922	1.44995	0.902727	0.977069												0.722451
					0.883386	1.20479					0.90031	1.17137	0.687266	1.4864	1.25501	0.989219												0.763965
					0.915588	1.3069					0.855933	0.847372	0.670049	1.5009	1.65979	1.00708												0.854423
					0.856933	1.37929					0.875242	0.605084	0.671228	1.47892	1.85503	0.994492												0.942237
					0.774686	1.28618					0.983492	0.552064	0.650339	1.47677	1.6827	0.916561												0.962762
					0.752369	1.25098					0.780612	0.670891	0.648539	1.57016	1.26203	0.809722												0.88342
					0.804119	1.09171					0.84616	0.867545	0.598538	1.73798	0.81277	0.740639												0.746798
					0.895073	0.954685					0.813068	0.754358	0.607419	1.8198	0.560859	0.745528												0.630596
					0.87665	0.860968					0.787208	0.652057	0.745543	1.66994	0.545061	1.76515												0.573944
					0.674845	0.802578					0.81171	0.628514	0.920523	1.35945	0.664427	1.59535												0.711995
					0.613267	0.76308					0.900748	0.688452	1.00254	1.07523	0.831114	1.10155												0.699899
					0.615041	0.792882					0.998987	0.851145	0.979728	0.924462	0.975711	0.747888												0.751701
					0.653019	0.772945					1.0547	1.079	0.859487	0.931868	0.661892	0.558509												0.805502
					0.729671	0.835755					1.03669	1.23788	0.684228	1.04254	0.518265	0.48443												0.813067
					0.814757	0.958176					0.960641	1.20328	0.976673	1.50686	0.455689	0.529175												0.768284
					0.853861	1.04587					0.856368	1.00514	0.828598	1.42161	0.498739	0.69738												0.700293
					0.815413	1.20067					0.760834	0.767017	0.741418	1.46126	0.689173	0.917213												0.644529
					0.745772	1.14936					0.708311	0.608975	0.701333	1.58713	1.02015	1.06894												0.623204
					0.713088	0.989523					0.729652	0.603363	0.689476	1.67057	1.49174	1.09043												0.718794
					0.751253	0.860856					0.830189	0.755443	0.66826	1.64309	1.96169	1.042												0.713253
					0.833245	0.839276					0.775866	1.02101	0.610165	1.58841	2.06162	1.01131												0.723597
					0.824413	0.998854					0.887121	0.917962	0.567361	1.62448	1.72895	0.982811												0.726406
					0.656205	1.15939					0.890533	0.75163	0.629394	1.7735	1.23729	0.9061												0.726041
					0.617603	1.19874					0.863293	0.688738	0.793299	1.89209	0.789084	0.802664												0.73215
					0.622393	1.24607					0.849109	0.718294	0.964551	1.77856	0.540933	0.7348												0.744235
					0.641197	1.25524					0.864338	0.823797	1.06011	1.46247	0.530814	0.765069												0.751438
					0.687174	1.3263					0.923931	0.952398	1.03485	1.14741	0.647642	1.66512												0.76015
					0.751805	1.23888					0.990773	1.00486	0.913551	0.961932	0.795926	1.30469												0.700196
					0.791252	1.11253					1.02809	0.942936	0.953016	0.913679	0.923461	0.903284												0.697834
					0.771321	1.01268					1.00496	0.821157	0.83511	0.946982	0.679789	0.64031												0.757459
					0.719198	0.975151					0.936384	0.703137	0.783341	1.01078	0.528513	0.558532												0.84256
					0.694092	0.970105					0.843633	0.637607	0.745773	1.40212	0.444608	0.523593												0.917289
					0.724317	0.957482					0.748111	0.666081	0.686374	1.38142	0.482245	0.579291												0.734124
					0.798958	0.910205					0.682043	0.806402	0.610962	1.51769	0.690624	0.744568												0.85034
					1.12859	0.724881					0.679736	1.17935	0.58938	1.71964	1.08432	0.97763												0.993028
					0.791269	0.785405					0.747445	0.932105	0.667251	1.83454	1.57944	1.14915												1.06511
					0.64774	0.916283					0.865799	0.800294	0.819317	1.78276	2.10478	1.17069												0.959151
					0.61996	1.08303					0.861795	0.761045	0.968072	1.66195	2.11729	1.08773												1.11791
					0.628392	1.16679					0.926777	0.78096	1.057	1.61335	1.5396	1.00914												1.18067
					0.64375	1.23692					0.939893	0.807776	1.07571	1.6344	1.17087	0.943868												0.598722
					0.627154	1.1824					0.968135	0.784533	0.932352	1.73733	0.714151	0.853926												0.590216
					0.709239	0.993125					1.00079	0.721353	0.894933	1.79461	0.522919	0.760521												0.621635
					0.737447	0.87546					1.03504	0.671804	0.839334	1.56336	0.523594	0.72731												0.675169
					0.726653	0.905506					1.06542	0.657798	0.73442	1.25951	0.639785	0.802068												0.677069
					0.695005	1.06057					1.09105	0.675035	0.63439	1.02304	0.77261	1.01386												0.613923
					0.685991	1.23213					1.09783	0.727094	0.614331	0.902909	0.88415	1.49273												0.606505
					0.717236	1.31931					1.06742	1.443	0.686615	0.874992	0.707303	1.08395												0.631382
					0.791357	1.32309					1.01163	1.15654	0.799591	0.917898	0.543943	0.783455												0.666831
					1.10496	1.26946					0.938703	0.935757	0.920534	0.998429	0.448214	0.629931												0.757839
					0.78121	1.18389					0.860985	0.806074	1.0113	1.4123	0.46385	0.567456												0.678378
					0.641909	1.07836					0.788091	0.736513	0.983103	1.33577	0.657912	0.56431												0.650682
					0.622793	1.00926					0.743096	0.682567	0.950793	1.40856	1.03891	0.622556												0.658517
					0.641325	1.02524					0.75813	0.60874	0.819524	1.61663	1.542	0.764488												0.679233
					0.662468	1.11301					0.827797	0.550486	0.707953	1.85063	1.92431	0.986652												0.673199
					0.67754	1.19362					0.80194	0.553581	0.675152	1.9564	1.88029	1.18453												0.632925
					0.691673	1.20739					0.918864	0.625548	0.702036	1.85096	1.49133	1.23402												0.835994
					0.692097	1.09491					0.986618	0.716321	0.78441	1.6107	1.04202	1.1482												0.716377
					0.682375	0.727004					1.05482	1.3212	0.806855	1.49257	0.679142	1.03222												0.682914
					0.670553	0.684061					1.1132	1.0499	1.03602	1.48969	0.506151	0.916119												0.705888
					0.677585	0.800199					1.16339	0.846703	0.908169	1.54714	0.526347	0.791466												0.747848
					0.719091	0.98333					1.19644	0.708068	0.780226	1.61134	0.636545	0.693901												0.755014
					0.791179	1.16731					1.21305	0.597268	0.727562	1.64048	0.75971	0.699059												0.697721
					1.1348	1.2844					1.20633	0.708076	0.730764	1.39112	0.854205	0.817431												0.604795
					0.745457	1.27004					1.18043	0.617205	0.906042	1.08332	0.736646	1.05196												0.957586
					0.609659	1.12355					1.14373	0.653477	0.835169	0.897079	0.557054	1.33689												0.786048
					0.626219	0.94112					1.09604	0.937877	0.601263	0.816306	0.456594	0.9522												0.684477
					0.650755	0.81763					1.04068	0.809349	0.581572	0.831978	0.452502	0.714864												0.693559
					0.679368	0.880449					0.97333	0.705792	0.594325	0.633133	0.604548	0.606831												0.78189
					0.689968	1.02164					0.893257	0.648917	0.72382	1.31337	0.914829	0.575015												0.857838
					0.679697	1.17584					0.839817	0.649301	0.814003	1.33341	1.2904	0.584473												0.836144
					0.663574	1.25044					0.837175	0.699507	0.819317	1.48442	1.43615	0.627134												0.71555
					0.651041	1.22521					0.487958	0.736358	0.761566	1.73244	1.47729	0.736556												0.57812
					0.650606	1.13904					0.699194	0.729952	0.694987	1.95186	1.19352	0.953875												0.501633
					0.672477	0.989038					0.904256	0.765877	0.67149	1.98171	0.815612	1.20202												0.806233
					0.720678	0.966906					1.01206	0.780793	0.628499	1.77741	0.602477	1.30731												0.641154
					0.791658	1.00164					1.06951	0.739992	0.683152	1.48896	0.498373	1.23498												0.662932
					1.19146	1.14626					1.10798	0.687666	0.722967	1.27624	0.537912	1.08561												0.672538
					0.848305	1.34344					1.14434	0.667082	0.758388	1.21856	0.637791	0.912136												0.846085
					0.673803	1.48814					1.18386	0.701702	0.851625	1.32679	0.745636	0.737435												0.939349
					0.63005	1.49612					1.22601	0.600249	0.977298	1.53353	0.81628	0.633234												0.878277
					0.652221	0.701179					1.25292	0.684649	1.03285	1.65533	0.777257	0.652456												0.70224
					0.682666	0.663055					1.25928	0.841723	0.954182	1.49955	0.566499	0.79387												0.541651
					0.688152	0.803421					1.2558	0.952247	0.8072	1.13987	0.46561	1.02155												0.469556
					0.673534	0.995756					1.23306	0.914203	0.680692	0.897708	0.449666	1.18758												0.825714
					0.65467	1.1555					1.19591	0.786674	0.649594	0.769526	0.553182	1.22522												0.681985
					0.643033	1.21616					1.13434	0.68172	0.805086	0.656514	0.770653	0.876912												0.651348
					0.627958	1.14806					1.03449	0.631562	0.730628	0.60235	0.958684	0.679832												0.735698
					0.669149	1.00306					0.918169	0.982899	0.792754	1.23948	1.12477	0.595125												0.874276
					0.721904	0.859128					0.844483	0.670065	0.9059	1.32761	1.06567	0.57538												0.943725
					0.794754	0.78334					0.43753	0.56358	0.948611	1.55909	0.879229	0.577421												0.851683
					0.913505	0.81011					0.596343	0.615536	0.917811	1.833	0.670704	0.596178												0.657697
					0.707241	0.920679					0.85349	0.786371	0.949802	1.99169	0.537223	0.681417												0.499546
					0.639398	1.04396					1.01885	1.05193	1.08607	1.88632	0.511592	0.90527												0.428514
					0.645	1.11033					1.05636	1.23967	1.19771	1.57141	0.563906	1.22653												0.792401
					0.664497	1.0899					1.04678	1.15963	1.12994	1.25738	0.644149	1.3608												0.659023
					0.674475	1.01107					1.02705	0.931109	0.925874	1.00237	0.723188	1.30509												0.651992
					0.668717	0.936991					1.05376	0.732217	0.732215	0.93633	0.846674	1.17239												0.734648
					0.664976	0.942496					1.11742	0.604018	0.653207	1.02501	0.580352	0.927998												0.841752
					0.657327	1.08287					1.18764	1.00629	1.12274	1.31679	0.479451	0.701229												0.874473
					0.656783	1.33153					1.22808	0.691925	0.988687	1.56571	0.456139	0.576481												0.773453
					0.677302	1.58518					1.24538	0.547218	0.835671	1.44555	0.518114	0.595076												0.599716
					0.725423	1.74918					1.23265	0.58028	0.77158	1.17874	0.648765	0.739471												0.462582
					0.791808	1.70735					1.21731	0.749654	0.868542	0.899051	0.770741	0.945275												0.393542
					0.976294	0.73363					1.17084	1.03971	1.02138	0.734726	0.803473	1.10114												0.800313
					0.750519	0.663387					1.06911	1.40773	1.07511	0.62561	0.737298	1.14576												0.673486
					0.64828	0.794621					0.925484	1.60824	1.02614	0.570267	0.618154	0.821437												0.659426
					0.627048	0.960997					0.796586	1.42751	1.02918	1.19149	0.527081	0.656934												0.710816
					0.635084	1.07564					0.468053	1.07884	1.16699	1.30446	0.509281	0.591971												0.763526
					0.650756	1.08683					0.535738	0.79749	1.31882	1.57643	0.547835	0.577923												0.763709
					0.666633	1.00053					0.804671	0.610882	1.27992	1.86582	0.606819	0.564564												0.678758
					0.680658	0.88337					1.04411	1.04866	1.05603	1.96616	0.6614	0.535743												0.548616
					0.684456	0.783516					1.10903	0.747727	0.813902	1.72503	0.680853	0.633057												0.438088
					0.679231	0.728297					1.06482	0.579533	0.680412	1.28815	0.965994	0.883457												0.376764
					0.690107	0.73843					0.987622	0.565527	0.699892	1.04716	0.612946	1.27023												0.732566
					0.729733	0.803576					0.952131	0.698882	1.25901	0.849432	0.492083	1.5483												0.680897
					0.787006	0.895241					0.999409	0.936276	1.21413	0.757635	0.461512	1.53419												0.677673
					1.05209	0.958977					1.07462	1.39059	1.12784	0.829397	0.491443	1.29031												0.68196
					0.792369	0.958049					1.10486	1.81251	0.985153	1.07776	0.561193	0.97053												0.661376
					0.6485	0.91645					1.09368	1.92726	0.844814	1.28031	0.608263	0.690057												0.598843
					0.602187	0.896449					1.07641	1.59501	0.788503	1.49218	0.591952	0.537253												0.513295
					0.603177	0.994571					1.07771	1.07479	0.870328	1.21582	0.524585	0.515685												0.438374
					0.627085	1.22499					1.06689	0.810645	1.02053	0.909276	0.464458	0.673401												0.38485
					0.661434	1.51319					1.00216	0.599965	1.09909	0.724322	0.465997	0.862148												0.747503
					0.688582	1.75208					0.859904	1.10346	1.08452	0.587838	0.526755	1.02297												0.722542
					0.670202	1.85771					0.691607	0.834794	1.10454	0.705314	0.603088	1.01815												0.662214
					0.68836	0.814073					0.528372	0.681394	1.24943	1.1506	0.663644	1.05434												0.630292
					0.691796	0.690197					0.511276	0.636984	1.422	1.24952	0.687164	0.772686												0.596531
					0.698448	0.787022					0.783066	0.700186	1.40546	1.52076	0.65992	0.633002												0.557172
					0.783771	0.925634					1.10238	0.909633	1.16937	1.81135	0.478663	0.584799												0.506246
					1.12568	1.00647					1.22024	1.2697	0.892892	1.87384	0.460585	0.57841												0.457594
					0.82116	0.988567					1.18777	1.73397	0.718361	1.5721	0.47133	0.563268												0.785757
					0.638868	0.897608					1.0809	2.1022	0.686011	1.17536	0.504523	0.554624												0.676206
					0.561825	0.800922					0.986789	2.05228	1.27773	0.896255	0.515921	0.64485												0.614327
					0.581547	0.682044					0.975623	1.59728	1.2208	0.709872	0.480783	0.916388												0.582341
					0.613602	0.68971					1.0015	1.05823	1.11191	0.616088	0.425823	1.33516												0.559628
					0.633456	0.67672					0.977707	0.77292	0.982934	0.658382	0.415592	1.68915												0.539756
					0.67927	0.702682					0.913544	0.552018	0.856498	0.861854	0.47409	1.68286												0.51531
					0.655208	0.767565					0.868483	0.87922	0.795203	1.1642	0.571782	1.40211												0.639111
					0.67497	0.826377					0.877534	0.778586	0.839069	1.36688	0.662722	1.03924												0.642102
					0.685093	0.849585					0.903397	0.769741	0.951873	1.21305	0.713618	0.711811												0.609245
					0.725465	0.84983					0.880598	0.823126	1.0446	0.939026	0.690527	0.521964												0.605875
					0.789049	0.903963					0.756959	0.952875	1.08546	0.740577	0.731697	0.495616												0.616507
					0.851215	1.08842					0.587085	1.18466	1.15804	0.641662	0.511869	0.610363												0.639125
					0.637154	1.37006					0.485139	1.54094	1.32714	0.432943	0.451484	0.790842												0.677886
					0.567224	1.6263					0.749052	1.95346	1.46145	1.14251	0.453959	0.957807												0.696699
					0.574644	1.77506					1.1281	2.17057	1.47666	1.19919	0.473297	1.03712												0.721839
					0.608082	1.73836					1.30152	1.93954	1.22188	1.43949	0.471222	0.955992												0.574467
					0.644417	0.744752					1.29592	1.45091	0.937295	1.71229	0.438598	0.666889												0.638455
					0.656126	0.806309					1.19444	1.00875	0.744571	1.75167	0.411645	0.603013												0.65401
					0.637143	0.939187					1.0807	0.687177	0.691794	1.45195	0.437221	0.574807												0.569823
					0.654644	1.01543					1.01446	0.464861	1.27871	1.08277	0.520309	0.583497												0.596171
					0.684613	0.987019					0.987407	0.85675	1.19312	0.820055	0.624654	0.592111												0.602444
					0.744048	0.876975					0.931291	0.794431	1.0638	0.639573	0.702065	0.618186												0.672531
					0.811929	0.763677					0.851245	0.857692	0.95269	0.535003	0.706593	0.743014												0.621896
					0.900974	0.697413					0.797677	0.973088	0.855295	0.549269	0.54054	1.02048												0.586815
					0.652073	0.664342					0.799266	1.10724	0.784818	0.702529	0.456872	1.42867												0.572353
					0.575365	0.634079					0.816459	1.25769	0.785712	0.985119	0.455066	1.71502												0.617078
					0.58417	0.627917					0.793126	1.4589	0.849002	1.16759	0.47193	1.89902												0.641308
					0.618242	0.658904					0.686149	1.66324	0.930626	1.23062	0.469259	1.58136												0.666797
					0.641669	0.716582					0.541687	1.99851	1.01523	0.989429	0.450818	1.12958												0.731648
					0.643723	0.754623					0.428182	1.90298	1.15338	0.771701	0.452944	0.763247												0.643063
					0.641051	0.786386					0.673195	1.63772	1.37014	0.633923	0.500382	0.536831												0.588306
					0.662151	0.923219					1.06946	1.21932	1.54647	1.29039	0.582929	0.47358												0.578558
					0.714541	1.17273					1.26348	0.870915	1.47552	1.13863	0.659308	0.563781												0.585742
					0.788108	1.44181					1.27994	0.601346	1.19764	1.18571	0.666864	0.734869												0.608035
					0.705284	1.5953					1.20169	0.758518	0.915383	1.3953	0.611795	0.914458												0.638926
					0.600341	0.871815					1.08802	0.843918	0.737287	1.62688	0.49965	1.05086												0.741036
					0.591973	1.02065					1.00804	1.02555	0.701818	1.56001	0.491018	1.14457												0.646041
					0.640101	1.11763					0.983045	1.22647	1.24106	1.39474	0.50597	0.846575												0.583471
					0.662992	1.09446					0.976171	1.38738	1.08918	1.07517	0.505722	0.653395												0.555952
					0.665904	0.951068					0.962257	1.479	0.964544	0.826969	0.504449	0.572752												0.553063
					0.67639	0.781919					0.937985	1.68797	0.885277	0.63685	0.535684	0.567215												0.573891
					0.713992	0.674289					0.911366	1.86286	0.812608	0.513727	0.595835	0.602546												0.621957
					0.78246	0.630565					0.867376	1.86478	0.74677	0.503472	0.647369	0.65964												0.742573
					0.85661	0.969523					0.794096	1.60563	0.711108	0.619572	0.572337	0.752626												0.645027
					0.796632	1.13861					0.695623	1.24298	0.726098	0.88437	0.577829	0.904511												0.584481
					0.639993	1.27599					0.51861	0.944339	0.777976	1.11755	0.562493	1.19472												0.555254
					0.64137	1.27978					0.928747	0.721994	0.884138	1.25943	0.565081	1.46677												0.550008
					0.679592	1.12097					1.13626	0.520161	1.08311	1.03343	0.581136	1.92651												0.574892
					0.712939	1.2303					1.14392	1.00771	1.35924	0.788485	0.617816	2.00446												0.733635
					0.727578	1.38811					1.07776	0.799714	1.53841	0.619394	0.690317	1.6726												0.645358
					0.755678	1.43746					0.983681	0.822957	1.42402	1.27147	0.50365	1.20621												0.603877
					0.808491	0.923128					0.932548	1.00113	1.11296	1.1419	0.499085	0.826719												0.590565
					0.888884	0.837448					0.971944	1.25279	0.83776	1.20963	0.538501	0.574752												0.595398
					0.949999	0.826124					1.06697	1.45571	0.688144	1.40143	0.599229	0.477703												0.623594
					0.693561	0.868814					1.14	1.56767	0.683689	1.60084	0.668189	0.534646												0.64448
					0.688505	0.866423					1.15269	1.68246	1.1325	1.62325	0.736425	0.687609												0.641093
					0.743203	0.75273					1.09309	1.85579	0.914563	1.42053	0.586289	0.872829												0.661985
					0.794054	0.717672					0.969452	1.88749	0.824579	1.14881	0.440665	1.05872												0.69031
					0.828591	0.689786					0.825693	1.616	0.792905	0.907929	0.453159	1.085												0.721891
					0.865888	0.762277					0.751718	1.20236	0.754351	0.695747	0.489222	0.755611												0.690346
					0.927345	1.14263					0.742421	0.870746	0.690521	0.54775	0.511422	0.611616												0.764192
					0.999881	0.864351					0.986067	0.675559	0.627155	0.504184	0.585586	0.556741												0.81388
					0.832713	0.709004					1.00248	0.571569	0.602165	0.595611	0.632751	0.568759
					0.905919	0.663076					0.928208	0.859554	0.634154	0.840791	0.723238	0.644394
					0.944044	0.657706					0.859586	0.842884	0.758474	1.15769	0.714092	0.77163
					0.982567	0.665896					0.865004	0.985148	1.01309	1.24204	0.550842	0.942351
					1.0257	0.68861					0.978902	1.24238	1.34733	1.0252	0.470791	1.15996
					0.941177	0.74961					1.13492	1.49771	1.52598	0.718378	0.465641	1.43499
					0.877682	1.14382					1.24244	1.5996	1.36067	0.586089	0.495772	1.75681
					0.905561	0.901411					1.25057	1.64514	1.01593	1.17312	0.522603	1.91535
					1.00609	0.726485					1.1616	1.78831	0.74667	1.12711	0.535158	2.00799
					1.0658	0.663273					0.973236	1.95472	0.627455	1.23365	0.563992	1.61323
					1.00457	0.66234					0.801765	1.81009	0.651339	1.42143	0.657086	1.24233
					0.881914	0.674341					0.734944	1.33756	0.972599	1.64711	0.817468	0.878713
					0.78226	0.672506					0.544438	0.892512	0.742916	1.70896	0.616862	0.618766
					0.792055	0.668812					0.816905	0.605522	0.704296	1.55925	0.548071	0.493748
					0.8905	0.682905					0.917731	0.450289	0.70138	1.22325	0.536624	0.519046
					1.00257	1.12229					0.876518	0.86334	0.724	1.03719	0.562196	0.64972
					0.96222	0.913792					0.833602	0.817384	0.66395	0.787439	0.579597	0.841338
					0.985667	0.770397					0.877256	0.952001	0.583114	0.610195	0.553823	1.05751
					0.940844	0.703942					1.00666	1.20717	0.537381	0.540061	0.521104	1.03746
					0.829576	0.708844					1.13758	1.51149	0.573055	0.597852	0.523875	0.734577
					0.705126	0.745043					1.20013	1.6734	0.734856	0.804347	0.599237	0.599625
					0.688579	0.7736					1.16517	1.65718	1.04445	1.06201	0.747221	0.533649
					0.778883	0.748592					1.03717	1.69319	1.41173	1.072	0.899079	0.58142
					0.868199	0.703966					0.838226	1.86877	1.55529	0.939728	0.639423	0.706406
					1.02652	0.672786					0.716434	1.96358	1.28005	0.709913	0.569276	0.923033
					0.875628	1.07479					0.625682	1.62738	0.947707	0.453869	0.598133	1.18635
					0.893257	0.871634					0.869646	1.05745	0.685945	1.0794	0.685908	1.45922
					0.871373	0.772311					0.962078	0.690427	0.587918	1.09549	0.759338	1.73208
					0.770653	0.738514					0.94747	0.445084	0.620965	1.23477	0.746813	1.97891
					0.651926	0.761438					0.966289	1.06461	0.835528	1.44172	0.648591	2.07575
					0.621168	0.824329					1.03548	0.807562	0.636494	1.74429	0.541298	1.90887
					0.703222	0.895197					1.07876	0.874084	0.634067	1.7743	0.49892	1.57262
					0.841678	0.915026					1.06495	1.10284	0.707106	1.78368	0.552986	1.20886
					0.969225	0.85981					0.971088	1.4294	0.759105	1.39848	0.68114	0.8893
					0.834262	0.772504					0.824097	1.70779	0.729465	1.18945	0.82444	0.641083
					0.776131	0.705807					0.671393	1.74218	0.644128	0.889174	0.600716	0.505343
					0.810444	0.675511					0.593264	1.6838	0.596466	0.678132	0.559369	0.514765
					0.80422	1.04892					0.889563	1.75944	0.660263	0.578868	0.681687	0.632238
					0.731976	0.843431					1.17348	1.88069	0.882559	0.599384	0.888745	0.821215
					0.634987	0.738076					1.17491	1.86471	1.2421	0.739699	1.02872	1.05946
					0.597679	0.724027					1.09576	1.38729	1.57905	0.902344	0.977472	1.04652
					0.660749	0.774573					1.06074	0.891995	1.61727	0.926951	0.793524	0.758962
					0.782652	0.868869					1.01715	0.563651	1.30058	0.800164	0.60461	0.60887
					0.895026	0.981195					0.944612	0.358435	0.910614	0.627929	0.507037	0.548649
					0.952473	1.03152					0.825846	0.923493	0.662807	1.00808	0.525322	0.595658
					0.79261	1.04263					0.700063	0.844629	0.573261	1.04749	0.628956	0.787458
					0.737024	0.963856					0.612261	0.990436	0.596528	1.21112	0.773073	1.10343
					0.740425	0.842214					0.842969	1.26687	0.772252	1.49639	0.895458	1.457
					0.745151	0.747805					1.41152	1.58101	0.59903	1.84455	0.80903	1.768
					0.712583	0.687318					1.43912	1.74902	0.601984	2.07461	0.574493	2.00375
					0.649974	1.03268					1.26309	1.72624	0.718057	2.01904	0.559247	2.11852
					0.610969	0.841723					1.13424	1.65096	0.858044	1.72936	0.756098	2.0299
					0.646151	0.730015					1.02465	1.8594	0.896209	1.35219	1.07942	1.69463
					0.737418	0.698623					0.928875	1.90326	0.824169	1.00453	1.29441	1.41634
					0.830255	0.748948					0.831659	1.66817	0.783441	0.754691	1.23048	1.10978
					0.879064	0.856369					0.762831	1.08961	0.898376	0.612123	0.960502	0.838454
					0.761763	0.996904					1.1622	0.741389	1.20266	0.588627	0.714299	0.620066
					0.695247	1.1301					1.02671	0.471818	1.58538	0.662792	0.565104	0.511253
					0.692027	1.1591					0.940796	1.0411	1.7458	0.719471	0.534832	0.529927
					0.709011	1.15438					0.914947	0.851355	1.65651	0.740097	0.601283	0.644452
					0.70795	1.02125					0.787401	0.915886	1.25407	0.657369	0.724387	0.822495
					0.682048	0.880053					0.728928	1.12016	0.872233	0.544492	0.869431	1.05112
					0.645508	0.772929					0.728229	1.3922	0.647911	0.993127	1.17447	1.08952
					0.647441	0.703111					0.742431	1.60478	0.561748	1.15549	0.765609	0.79516
					0.702147	0.988676					0.77592	1.66778	0.566354	1.47664	0.549437	0.607406
					0.768067	0.82393					0.804589	1.5868	0.777794	1.87898	0.55565	0.531692
					0.810642	0.728401					0.882089	1.77703	0.587009	2.17709	0.805582	0.610853
					0.963278	0.699494					0.828046	1.9426	0.579535	2.17669	1.2037	0.883453
					0.734764	0.728649					0.790844	1.85059	0.722822	1.78957	1.4815	1.29537
					0.664659	0.820765					0.742926	1.42484	0.949428	1.50032	1.43636	1.70322
					0.664568	0.955915					0.730934	0.903921	1.08697	1.12582	1.15083	1.98831
					0.68827	1.11126					0.746316	0.615568	1.0767	0.826398	0.864224	2.12547
					0.712621	1.24012					0.803835	0.385319	1.07228	0.631877	0.681269	2.09038
					0.713839	1.27955					0.864962	1.10705	1.24669	0.568579	0.594813	1.87238
					0.6797	1.1933					0.83232	0.833284	1.60136	0.603238	0.595353	1.48026
					0.65242	1.02789					0.814798	0.837091	1.93396	0.636562	0.674874	1.23174
					0.666063	0.848301					0.781287	0.990188	1.96417	0.616913	0.806328	0.965201
					0.710394	0.735111					0.75592	1.21406	1.57055	0.557016	1.03128	0.743656
					0.745948	0.714381					0.747709	1.42601	1.16507	0.901657	0.712741	0.578985
					0.943601	0.977663					0.816366	1.51917	0.806114	1.05525	0.5489	0.522656
					0.717309	0.79777					0.783513	1.52783	0.620999	1.37436	0.579055	0.568744
					0.647482	0.709144					0.741919	1.6057	0.544771	1.77911	0.845525	0.679851
					0.652327	0.694211					0.705829	1.80919	0.524128	2.12291	1.25304	0.838199
					0.68485	0.72172					0.689641	1.90516	0.83018	2.03635	1.55648	1.03451
					0.72192	0.794791					0.732509	1.58822	0.602175	1.93814	1.54163	1.13437
					0.737471	0.906843					0.765669	1.1337	0.562479	1.56362	1.29311	0.814185
					0.703048	1.043					0.774979	0.798825	0.698484	1.18999	1.03699	0.593934
					0.658823	1.18062					0.762134	0.49938	0.955486	0.863246	0.837324	0.513283
					0.645154	1.25622					0.827698	0.897219	1.19777	0.63747	0.683264	0.642797
					0.657731	1.30863					0.834949	0.779648	1.32213	0.553919	0.594456	0.994858
					0.686864	1.19129					0.790142	0.868545	1.41355	0.588585	0.6128	1.45092
					0.935286	1.00808					0.696054	1.04469	1.62424	0.621026	0.721974	1.82228
					0.707354	0.851454					0.639444	1.16594	1.94114	0.595814	0.873083	2.01588
					0.636419	0.720036					0.624591	1.37052	2.13938	0.830839	0.863316	2.02419
					0.644125	0.712218					0.687477	1.38103	2.01105	0.920535	0.662186	1.87799
					0.685205	1.04871					0.742765	1.38479	1.55765	1.18854	0.576163	1.6212
					0.72825	0.831405					0.768702	1.51354	1.05533	1.56093	0.646087	1.31414
					0.746137	0.71304					0.758552	1.63434	0.72601	1.90824	0.896436	1.03727
					0.717201	0.684899					0.810873	1.6816	0.58333	2.02442	1.26041	0.810727
					0.666397	0.711688					0.941122	1.36816	0.527292	1.82149	1.54086	0.628793
					0.631154	0.776927					1.03823	0.99113	0.96292	1.47485	1.56658	0.56724
					0.621413	0.822167					1.04054	0.656775	0.653786	1.12443	1.40514	0.572535
					0.638434	0.928694					0.988002	0.353638	0.559058	0.825544	1.20679	0.635807
					0.947504	1.06484					0.905027	0.993687	0.643914	0.618122	0.999254	0.733501
					0.709996	1.20323					0.848759	0.773907	0.883295	0.558155	0.770372	0.855633
					0.62402	1.30484					0.812435	0.782734	1.20185	0.629782	0.540776	1.15571
					0.634535	1.30483					0.821133	0.908454	1.48591	0.708588	0.551111	0.809213
					0.684475	1.17702					0.817429	1.0711	1.70483	0.683162	0.64102	0.571339
					0.734914	0.98689					0.807226	1.21509	1.914	0.831575	0.791779	0.5127
					0.754081	0.82743					0.775179	1.26933	2.10327	0.799634	0.722738	0.698777
					0.724831	0.700312					0.7881	1.25013	2.1622	0.985598	0.616435	1.09807
					0.670058	0.711524					0.933251	1.26121	1.9329	1.2935	0.617378	1.51282
					0.626224	1.13506					0.894962	1.3601	1.43795	1.60872	0.733347	1.76414
					0.60241	0.901931					1.06829	1.4444	0.946102	1.74521	0.964095	1.81515
					0.61002	0.737475					1.18619	1.34153	0.657249	1.57913	1.25778	1.72502
					0.973525	0.709549					1.24771	1.09177	0.547548	1.25688	1.50015	1.46852
					0.714089	0.722202					1.27486	0.805224	0.507236	0.951281	1.58134	1.31812
					0.617921	0.775074					1.26921	0.504958	0.758661	0.720449	1.51412	1.07731
					0.624608	0.842624					1.2422	0.788786	0.57669	0.589577	1.37153	0.806045
					0.679753	0.909755					1.18007	0.716565	0.585258	0.596164	1.13898	0.675872
					0.736824	0.983575					1.11333	0.799203	0.768973	0.747665	0.828715	0.596797
					0.761559	1.0704					1.03654	0.924462	1.11934	0.878028	0.578778	0.603484
					0.727625	1.18463					0.964383	1.05384	1.5202	0.94034	0.510533	0.657754
					0.671424	1.28358					0.874341	1.1427	1.81922	0.753954	0.60092	0.724379
					0.625495	1.28618					0.810301	1.17174	1.9795	0.831679	0.759409	0.792553
					0.596961	1.15321					0.883912	1.16343	2.05057	1.05359	0.641924	0.853114
					0.589633	0.963201					0.787134	1.15154	2.00069	1.30573	0.584249	1.16648
					1.01023	0.812605					0.959515	1.14324	1.73132	1.42299	0.63751	0.781069
					0.735985	0.724825					1.09757	1.09845	1.26763	1.29815	0.794636	0.558185
					0.622646	0.707976					1.22565	0.987308	0.847551	1.02819	0.975911	0.539698
					0.623597	0.948892					1.35129	0.827613	0.606547	0.774274	1.26879	0.76698
					0.679081	0.805029					1.48228	0.622915	0.515928	0.62373	1.48113	1.14831
					0.741607	0.715796					1.57065	0.920328	0.902505	0.594702	1.607	1.37239
					0.765902	0.749246					1.57772	0.686237	0.615856	0.709465	1.62343	1.51771
					0.73057	0.793322					1.5046	0.706195	0.532925	0.950553	1.50758	1.44108
					0.672837	0.848779					1.41476	0.79969	0.660039	1.13078	1.22882	1.30756
					0.62166	0.839085					1.31402	0.899124	0.998538	0.826454	0.850467	1.16814
					0.597335	0.921926					1.20328	0.986661	1.42825	0.767315	0.558146	1.02311
					0.588369	0.957836					1.0453	1.05358	1.71587	0.880738	0.502573	0.861715
					1.05412	1.02925					0.898315	1.10276	1.80076	1.04365	0.61836	0.703166
					0.769691	1.14072					0.882562	1.10588	1.77795	1.13082	0.791845	0.60411
					0.644079	1.2469					0.806044	1.03718	1.66712	1.01235	0.62116	0.599938
					0.63578	1.2468					0.935995	0.909326	1.41657	0.855057	0.563835	0.674388
					0.682611	1.11552					1.02078	0.790162	1.06871	0.670867	0.631333	0.757084
					0.739366	0.933142					1.13312	0.694145	0.75765	0.604988	0.815298	0.830688
					0.75832	0.794036					1.29048	0.588316	0.563405	0.697382	1.03152	0.841186
					0.7239	0.722645					1.47534	0.425967	0.483707	0.937305	1.30137	1.12728
					0.667355	0.704001					1.60877	1.14515	0.664139	0.980744	1.49714	0.749463
					0.622457	0.913511					1.64429	0.76922	0.504199	0.77504	1.64292	0.557822
					0.60426	0.796134					1.60392	0.66296	0.588524	0.75597	1.70301	0.581986
					0.597924	0.739154					1.56078	0.710934	0.87581	0.819355	1.58549	0.807899
					0.821398	0.718228					1.50532	0.781504	1.23707	0.869838	1.2583	1.10255
					0.675123	0.802288					1.39204	0.832495	1.4525	0.844293	0.834342	1.24371
					0.647779	0.864294					1.21503	0.877781	1.45504	0.757709	0.541015	1.1825
					0.681215	0.904884					1.03022	0.958641	1.35523	0.684588	0.513573	1.04043
					0.722212	0.913738					0.953655	1.0407	1.23337	0.738646	0.668043	0.92631
					0.733616	0.906982					0.735006	1.03883	1.07519	0.936062	0.85623	0.863389
					0.709401	0.856999					0.821655	0.905345	0.87666	0.615173	0.623731	0.80187
					0.669812	0.977645					0.868771	0.716453	0.681927	0.667396	0.551567	0.711645
					0.636141	1.09301					0.96789	0.572579	0.522367	0.713744	0.609968	0.619728
					0.623183	1.18831					1.11955	0.476423	0.734514	0.821502	0.815196	0.582941
					0.878924	1.18042					1.30582	0.378009	0.531586	0.931357	1.10289	0.638824
					0.703189	1.05293					1.44421	0.68582	0.571688	1.18495	1.36408	0.756839
					0.652141	0.897661					1.5	0.661382	0.770983	1.35952	1.56347	0.875677
					0.665965	0.784849					1.51766	0.713279	1.01497	1.44088	1.70377	0.928478
					0.692867	0.730729					1.55336	0.745308	1.14035	1.42524	1.73601	1.10902
					0.705726	0.721429					1.55962	0.74553	1.08016	1.39636	1.57724	0.736124
					0.701809	0.856255					1.48449	0.715327	0.948433	1.39384	1.21345	0.576787
					0.688625	0.753296					1.33437	0.854642	0.853921	1.38799	0.785513	0.621771
					0.671453	0.700365					1.15247	0.946839	0.799685	1.25915	0.525076	0.805371
					0.663136	0.685825					0.565448	0.92321	0.736486	1.18665	0.533675	0.987916
					0.931694	0.765218					0.68798	0.773251	0.631021	0.889364	0.707021	1.01224
					0.707723	0.844891					0.731962	0.589705	0.859143	0.832895	0.89429	0.889055
					0.644949	0.904457					0.764671	0.449005	0.618716	0.958901	0.832506	0.721221
					0.649493	0.918561					0.868199	0.345084	0.601106	1.18771	0.618703	0.677415
					0.669554	0.899323					1.02483	0.664875	0.697593	1.38464	0.538679	0.675284
					0.693177	0.872093					1.19153	0.662904	0.820561	1.45885	0.59349	0.67028
					0.714325	0.83857					1.31108	0.691838	0.872234	1.4549	0.807957	0.632168
					0.72831	0.918144					1.39492	0.693675	0.797323	1.44268	1.13583	0.59623
					0.732872	1.03774					1.46802	0.667994	0.680361	1.43722	1.45909	0.6076
					0.720327	1.10329					1.55116	0.638525	0.620997	1.42388	1.69924	0.687928
					0.707454	1.07647					1.56593	0.743183	0.625639	1.37796	1.80705	0.823765
					0.641509	0.968782					1.49684	0.800727	0.639599	1.21756	1.72933	0.930307
					0.646696	0.859378					1.36162	0.771779	0.605483	1.68771	1.46574	0.760855
					0.669819	0.755499					1.18864	0.656561	0.752752	1.32336	1.08188	0.62074
					0.703753	0.762946					0.619734	0.521823	0.668373	1.03642	0.700002	0.657629
					0.744958	0.855344					0.731171	0.407108	0.667215	0.968594	0.503718	0.775065
					0.782625	0.731958					0.755113	0.746104	0.697296	1.05556	0.547253	0.861852
					0.804364	0.670139					0.794625	0.699601	0.705295	1.23182	0.713299	0.830202
					0.723453	0.662126					0.916373	0.669596	0.653443	1.39169	0.877302	0.70529
					0.660056	0.691547					1.0782	0.635932	0.572702	1.45973	0.8067	0.592669
					0.669316	0.783962					1.2328	0.606477	0.529377	1.46609	0.598239	0.560172
					0.695399	0.831069					1.33618	0.613805	0.536586	1.4526	0.522649	0.588497
					0.736517	0.902279					1.43056	0.647638	0.762222	1.42598	0.578633	0.612799
					0.791177	0.890323					1.52363	0.665052	0.680689	1.38582	0.792908	0.610539
					0.836793	0.855066					1.59042	0.635506	0.649575	1.32717	1.14785	0.610061
					0.707884	0.827115					1.56848	0.574089	0.644879	1.25042	1.5589	0.646501
					0.713892	0.842057					1.4504	0.504325	0.624737	1.10566	1.78933	0.724866
					0.740672	0.901092					1.27873	0.944314	0.589757	1.74484	1.92484	0.69614
					0.783446	0.962845					1.09669	0.802217	0.549092	1.40112	1.6752	0.702988
					0.834539	0.987331					0.982495	0.623439	0.704157	1.1538	1.28481	0.74731
					0.755315	0.954708					0.724715	0.580734	0.652162	1.09016	0.888671	0.760801
					0.780144	0.889822					0.865671	0.553587	0.650227	1.14105	0.579841	0.703252
					0.823507	0.838651					0.913318	0.576068	0.660617	1.25357	0.47572	0.601972
					0.915679	0.79359					0.973449	0.588495	0.83528	1.35487	0.554832	0.52907
					0.933907	0.838374					1.09537	0.57171	0.823861	1.39169	0.700412	0.522438
					0.967904	0.745233					1.23577	0.543404	0.840576	1.38797	0.832441	0.565439
					0.980227	0.670106					1.35494	0.525275	0.828235	1.36475	0.801098	0.604798
					0.872927	0.64601					1.43718	1.32502	0.760073	1.32111	0.580991	0.625616
					0.807696	0.66547					1.51189	1.21016	0.622943	1.26507	0.50881	0.653772
					0.811459	0.72253					1.58021	0.967973	1.02298	1.21927	0.554319	0.830275
					0.862113	0.795779					1.59898	0.712272	1.0755	1.1848	0.751403	0.765588
					0.925007	0.841665					1.51919	0.536461	1.14006	1.14769	1.10964	0.726904
					0.95989	0.870061					1.33819	0.505594	1.21123	1.0198	1.59072	0.677761
					0.787871	0.843076					1.1098	0.556066	1.20914	1.65622	1.98215	0.613777
					0.706402	0.802375					0.901078	0.572511	1.10458	1.68442	1.96607	0.550617
					0.704306	0.784512					0.802124	0.533225	0.929358	1.3831	1.57081	0.695456
					0.753219	0.800775					0.77373	0.502509	0.739394	1.20774	1.08633	0.763851
					0.827383	0.844427					1.01428	1.53325	0.597003	1.16698	0.693481	0.684637
					0.909236	0.868932					1.12512	1.47512	1.03284	1.19972	0.470812	0.630007
					1.1283	0.865328					1.20183	1.15433	1.19554	1.24219	0.457917	0.603558
					0.892327	0.850038					1.28816	0.77337	1.35743	1.12715	0.564928	0.711546
					0.725308	0.827306					1.36712	0.508523	1.49828	1.08728	0.692233	0.616805
					0.647121	0.844068					1.43388	0.473511	1.60462	1.18436	0.800478	0.603421
					0.639478	0.873231					1.48216	0.559874	1.62212	1.15325	0.823572	0.622943
					0.673418	0.951179					1.52292	0.587105	1.52484	1.11014	0.585427	0.616434
					0.730424	0.790354					1.53672	0.533172	1.35381	1.06911	0.500635	0.604904
					0.798387	0.690939					1.49317	1.67179	1.15842	1.05375	0.521625	0.641828
					1.2062	0.651725					1.36586	1.67755	0.978651	1.07467	0.683165	0.651294
					1.03512	0.658439					1.16907	1.32057	0.826585	1.11403	1.02235	0.579987
					0.826478	0.689913					0.935391	0.846718	0.954143	1.09657	1.51009	0.641178
					0.695519	0.731937					0.735815	0.510156	1.12836	1.65561	1.89236	0.721663
					0.639574	0.788458					0.66824	0.469152	1.36567	1.53695	1.84153	0.714184
					0.629229	0.823791					0.756163	0.559057	1.62168	1.30207	1.40638	0.6386
					0.636984	0.823706					1.07555	1.69082	1.82509	1.19122	0.846102	0.606482
					0.651586	0.795177					1.23113	1.31138	1.84408	1.17111	0.548526	0.666165
					0.69214	0.757503					1.30797	0.83263	1.94619	1.17478	0.415985	0.880966
					1.08259	0.747623					1.34688	0.881574	1.89234	1.13329	0.477122	0.697122
					0.908099	0.769831					1.35632	0.844407	1.78832	1.02776	0.601843	0.685689
					0.761621	0.789245					1.37577	0.85938	1.62213	0.839891	0.707145	0.805024
					0.694482	0.790693					1.40832	0.924755	1.40927	0.805618	0.605871	0.930539
					0.677508	0.791138					1.43543	0.851983	1.18481	0.860968	0.504657	0.904112
					0.667244	0.820018					1.40519	0.822054	0.947576	0.837889	0.491731	0.748013
					0.642285	0.882573					1.32015	0.857277	1.02246	0.832368	0.611531	0.620436
					0.605243	0.956308					1.1913	0.919535	1.17756	0.871205	0.887118	0.619314
					0.624708	1.02401					1.04599	0.886109	1.52889	0.949079	1.35595	0.745525
					0.911997	1.06565					0.892985	0.858984	1.83468	1.03758	1.66999	1.41115
					0.776339	0.749086					0.759879	0.862969	2.05382	1.08441	1.59804	1.08367
					0.721022	0.679417					0.722173	0.878896	2.14084	0.978483	1.20396	0.872224
					0.723578	0.665823					0.966983	0.890543	2.03015	1.6542	0.755447	0.814361
					0.738173	0.684253					1.15869	0.771258	2.13827	1.40583	0.475205	0.885416
					0.718217	0.718588					1.22301	0.874162	2.11309	1.20337	0.437339	1.05978
					0.665557	0.748461					1.24017	0.939978	2.01488	1.06234	0.551269	1.21362
					0.620383	0.770644					1.22311	0.941383	1.80197	1.03611	0.666742	1.16771
					0.611436	0.781327					1.23404	0.8861	1.51408	1.05812	0.732601	0.929716
					0.726784	0.771899					1.27506	0.806956	1.21771	0.944024	0.671064	0.696088
					0.675493	0.744528					1.31174	0.70892	0.920903	0.791481	0.51985	0.602971
					0.705294	0.724256					1.27995	0.936295	0.875419	0.696382	0.478956	0.681725
					0.762978	0.734544					1.19451	1.06303	1.09887	0.670219	0.56707	1.89445
					0.794184	0.764691					1.10106	1.02613	1.38418	0.664652	0.825788	1.62452
					0.762368	0.784495					1.04632	0.868003	1.70551	0.651608	1.1838	1.14783
					0.686847	0.792262					1.005	0.69769	2.00342	0.65557	1.41235	0.874432
					0.625367	0.831152					0.957617	1.21318	2.19068	0.720266	1.32816	0.841537
					0.616621	0.915979					0.938016	0.951339	2.25487	0.829948	0.994769	0.939985
					0.595508	1.01678					0.68627	0.682981	2.26659	0.943626	0.632498	1.10063
					0.620672	1.10433					0.975028	0.600744	2.28172	1.01561	0.457422	1.31243
					0.707438	1.15337					1.05899	0.762432	2.3068	0.989712	0.51331	1.47613
					0.794242	0.891761					1.0816	1.0177	2.26101	1.5961	0.6554	1.44078
					0.829141	0.760889					1.08923	1.18034	2.0726	1.54834	0.750536	1.17204
					0.780153	0.710787					1.11441	1.08606	1.77355	1.26305	0.750381	0.826699
					0.687432	0.708962					1.15956	0.83358	1.44853	1.09599	0.722762	0.617557
					0.629843	0.73714					1.20945	0.616284	1.12512	1.01616	0.537267	0.621381
					0.537306	0.77152					1.20021	1.00722	0.756088	0.924305	0.485355	0.772413
					0.609462	0.787764					1.14615	0.943154	0.940725	0.83697	0.551841	2.00463
					0.718892	0.784728					1.10311	0.832703	1.20259	0.713553	0.730111	1.92303
					0.811756	0.760306					1.12834	0.765092	1.54664	0.609672	0.992608	1.40789
					0.832141	0.732657					1.16396	0.850701	1.89357	0.558628	1.17003	0.873535
					0.768079	0.709422					1.16965	1.07792	2.14589	0.554895	1.07806	0.69207
					0.679672	0.711316					0.785275	1.22835	2.26524	0.586022	0.801935	0.804267
					0.62914	0.752282					0.969519	1.09247	2.31405	0.572303	0.533247	1.03419
					0.537735	0.810295					1.00279	0.806681	2.346	0.576725	0.466417	1.22816
					0.628107	0.870594					1.03266	0.58258	2.37258	0.642783	0.559591	1.48821
					0.73639	0.93482					1.06765	0.907787	2.40549	0.747741	0.75215	1.65665
					0.806811	1.02274					1.10532	0.990976	2.37786	0.843632	0.832509	1.67269
					0.80326	1.12947					1.1442	1.07984	2.21494	0.911982	0.767703	1.42986
					0.739979	1.22429					1.15519	1.04803	1.92651	0.932548	0.547752	1.0063
					0.670921	1.27018					1.14035	0.950806	1.59853	1.58485	0.49766	0.671782
					0.636662	1.22151					1.1268	0.947864	1.25954	1.36978	0.553014	0.582342
					0.580535	0.924333					1.16301	1.05238	0.877301	1.11685	0.709772	0.685348
					0.651787	0.810654					1.21333	1.12567	0.923539	0.990361	0.886122	1.98203
					0.74563	0.767818					1.23033	1.04625	1.04961	0.925284	0.958926	2.12406
					0.790723	0.778945					1.03858	0.782471	1.34874	0.823387	0.861107	1.78504
					0.767045	0.825923					1.07988	0.575108	1.72473	0.767349	0.643336	1.14271
					0.710635	0.88632					1.06473	0.956861	2.0623	0.646437	0.476167	0.671988
					0.671673	0.909425					1.08247	0.914647	2.25461	0.568148	0.440447	0.586346
					0.664231	0.871987					1.09304	1.11605	2.31927	0.54993	0.644492	0.791646
					0.649312	0.803117					1.10841	1.29576	2.36663	0.563069	0.817106	1.09931
					0.589181	0.734637					1.1191	1.28306	2.41563	0.568268	0.892827	1.32873
					0.662782	0.70166					1.11858	1.14335	2.42964	0.540083	0.804111	1.50666
					0.740417	0.730534					1.0934	1.0351	2.41793	0.541583	0.547182	1.64364
					0.765257	0.807927					1.08239	1.05711	2.37234	0.599969	0.496305	1.72323
					0.739577	0.925634					1.07829	1.08736	2.23593	0.703768	0.543607	1.67839
					0.701471	1.05546					1.07979	0.962768	1.97199	0.768526	0.655409	1.22742
					0.690854	1.18867					1.12459	0.744211	1.64035	0.814002	0.760495	0.775492
					0.706155	1.30685					1.16975	0.5662	1.29041	0.848466	0.779708	0.57974
					0.657338	1.39192					1.1656	0.895815	0.917008	0.836217	0.685955	0.615427
					0.596452	1.42993					1.10363	1.03149	0.962928	1.43708	0.544864	0.786959
					0.655519	1.38724					1.0825	1.31315	1.10078	1.18667	0.468377	2.031
					0.719366	0.953845					1.07059	1.52712	1.49968	0.990837	0.521339	1.91462
					0.743348	0.870504					1.06955	1.51537	1.86856	0.911501	0.671664	1.51112
					0.733868	0.852268					1.06756	1.31326	2.15868	0.872244	0.844324	0.886818
					0.7237	0.890183					1.02858	1.11856	2.2913	0.807968	0.918738	0.545645
					0.729125	0.980589					0.958682	1.02908	2.33786	0.638771	0.549172	0.55185
					0.748627	1.08015					0.88312	0.98205	2.4044	0.588215	0.485635	0.808849
					0.660664	1.12028					0.849638	0.861939	2.44362	0.542403	0.523765	1.1589
					0.597437	1.05805					0.934169	0.6858	2.40169	0.545243	0.597895	1.39365
					0.642772	0.928493					0.786709	0.529294	2.32088	0.560159	0.649091	1.53097
					0.700302	0.796214					1.2022	0.877892	2.25006	0.561148	0.636284	1.68609
					0.737438	0.740852					1.13167	0.955698	2.14383	0.546908	0.568276	1.84363
					0.757448	0.785248					1.05626	1.19268	1.91506	0.556939	0.50424	1.89369
					0.771594	0.910442					1.0439	1.50414	1.58383	0.621512	0.500602	1.46216
					0.789562	1.07647					1.03944	1.71722	1.2225	0.69341	0.572069	0.92423
					0.663782	1.26736					1.04227	1.69157	0.876465	0.742029	0.703648	0.621947
					0.598232	1.44215					1.00512	1.47354	0.970548	0.77821	0.85378	0.578981
					0.639431	1.56411					0.914149	1.20845	1.24794	0.813157	0.578553	0.707618
					0.701828	1.61691					0.795802	1.01773	1.58028	0.834582	0.476921	1.94162
					0.758436	1.58187					0.731539	0.88627	1.81262	1.27776	0.494701	1.79337
					0.808876	1.40319					0.814776	0.754674	2.14124	1.07387	0.544168	1.17807
					0.84699	0.929886					0.953337	0.611238	2.23172	0.939123	0.567175	0.686116
					0.858437	0.949205					1.14729	0.947489	2.30326	0.892824	0.54135	0.485694
					0.685711	1.04196					1.06611	0.850804	2.37844	0.862077	0.506273	0.559637
					0.615312	1.17781					1.04601	0.918442	2.35554	0.789338	0.507075	0.845409
					0.65657	1.323					1.05897	1.09564	2.05031	0.670579	0.553892	1.21161
					0.724609	1.38245					1.06786	1.3567	1.84436	0.576204	0.638907	1.44198
					0.79741	1.30388					1.04696	1.64501	1.77614	0.544862	0.755843	1.57808
					0.873591	1.11301					0.984785	1.82778	1.93162	0.554069	0.849756	1.75635
					0.929894	0.911252					0.889802	1.82038	1.77611	0.569512	0.483321	2.04188
					0.651083	0.814475					0.81686	1.6232	1.4622	0.567228	0.472858	2.05366
					0.691509	0.867957					0.994746	1.31931	1.11265	0.548438	0.505188	1.66201
					0.763715	1.0237					1.09293	1.01657	0.812497	0.5541	0.517576	1.07904
					0.847668	1.22283					1.08996	0.800943	0.581093	0.619006	0.502871	0.693364
					0.939006	1.4351					1.10905	0.649618	0.917486	0.714203	0.500375	0.574664
					1.00483	1.61877					1.12431	0.525419	1.20547	0.792138	0.542097	0.642877
					0.711121	1.7338					1.1259	0.907512	1.52175	0.838132	0.619411	1.76082
					0.735134	1.74359					1.13264	0.865455	1.8094	0.860051	0.712049	1.38426
					0.795402	1.62393					1.04172	0.953885	1.99046	0.856055	0.800274	0.919915
					0.873305	0.967862					1.12793	1.09325	2.08844	1.19962	0.460903	0.570005
					0.952767	1.06401					1.14613	1.27827	2.1893	1.06811	0.492559	0.473052
					0.780287	1.21447					1.15846	1.50685	2.2431	0.978622	0.530002	0.588639
					0.732864	1.3921					1.1774	1.73188	1.95711	0.94496	0.518036	0.883024
					0.735475	1.54483					0.817176	1.89817	1.76863	0.896879	0.540078	1.22594
					0.710302	1.62351					0.818156	1.94265	1.53014	0.79296	0.597433	1.50438
					0.694355	1.55171					0.790013	1.79297	1.54269	0.663546	0.675681	1.68944
					0.68716	1.31172					0.742703	1.41815	1.66229	0.579943	0.749064	1.89908
					0.699331	1.04554					0.721982	1.00929	1.61338	0.557507	0.580617	2.11424
					0.723441	0.898739					0.73026	0.718052	1.33538	0.565105	0.590798	2.13753
					0.698209	0.941474					0.752076	0.543313	1.00357	0.554917	0.609009	1.78368
					0.77541	1.11232					0.755997	0.428296	0.75963	0.587978	0.654584	1.21353
					0.859066	1.32405					0.75425	0.899343	0.630501	0.558618	0.694113	0.787493
					0.846155	1.51529					0.792855	0.869649	0.801124	0.547954	0.6408	0.600732
					0.949937	1.65989					0.910084	0.997207	1.06863	0.629804	0.652654	0.611728
						1.73933					0.904995	1.1606	1.31918	0.778017	0.696156	0.760859
						1.36144					0.866584	1.32261	1.43745	0.91028	0.708537	1.6349
						1.53509					0.816285	1.48112	1.60587	0.977675	0.678364	1.26152
						1.68168					0.783595	1.56072	1.74159	0.976254	0.612695	0.734099
						1.75838					0.744073	1.79396	1.87113	1.15262	0.572717	0.533887
						1.00273					0.703524	1.96835	1.86056	1.09096	0.568208	0.491703
						0.887108					0.665722	2.07471	1.69132	1.03951	0.585865	0.621991
						0.862545					0.638646	1.91522	1.25225	0.955348	0.605041	0.903407
						1.32523					0.634485	1.45317	1.03542	0.814288	0.622314	1.20959
						1.06408					0.642749	0.977768	1.18228	0.673312	0.652445	1.51563
						0.855483					0.672627	0.648326	1.46368	0.595849	0.604992	1.66024
						0.750221					0.736497	0.448443	1.50377	0.569974	0.550624	1.95876
						0.734995					0.85425	0.89691	1.24164	0.577547	0.529068	2.14042
						0.791428					0.881797	0.872238	0.921245	0.568883	0.533397	2.13787
						1.18083					0.952265	1.00962	0.718671	0.608447	0.539827	1.82904
						1.03503					0.908979	1.21026	0.653506	0.573467	0.553138	1.33279
						0.868305					0.843847	1.40712	0.76044	0.564235	0.587032	0.899708
						0.7337					0.775914	1.56132	0.889432	0.679554	0.656003	0.662011
						0.658967					0.730676	1.66341	1.03964	0.889664	0.770806	0.604098
						0.615799					0.687592	1.74311	1.23249	1.06489	0.59689	0.691225
						0.714792					0.645914	1.86694	1.45616	1.13798	0.521726	1.36476
						1.05923					0.605568	2.05499	1.6756	1.10546	0.49924	1.13058
						0.945766					0.602287	2.14343	1.7886	1.25738	0.524512	0.730395
						0.851335					0.63589	1.88766	1.67092	1.21397	0.555708	0.546131
						0.762042					0.7217	1.36565	1.28878	1.1417	0.552269	0.531749
						0.677275					0.827552	0.909649	0.874531	1.0233	0.535907	0.65967
						0.623232					0.948949	0.591977	0.778755	0.854395	0.554502	0.921624
						0.617908					0.862515	0.838325	1.07527	0.69933	0.624269	1.24445
						0.674773					0.926448	0.81377	1.44931	0.583414	0.740816	1.43946
						0.791611					0.900718	0.972288	1.4922	0.578993	0.529	1.76348
						1.00298					0.821413	1.20629	1.19145	0.580749	0.479087	1.98061
						0.881013					0.743815	1.45051	0.864238	0.599953	0.514135	2.10674
						0.809603					0.68335	1.64087	0.681734	0.608397	0.601063	2.05571
						0.771139					0.639183	1.70123	0.661101	0.595801	0.662562	1.81917
						0.729551					0.598449	1.77902	0.823502	0.636279	0.636332	1.43521
						0.690121					0.583536	1.83539	0.739418	0.806761	0.560815	1.03887
						0.652191					0.610391	1.97181	0.754922	1.02766	0.529017	0.753886
						0.636293					0.692375	2.09895	0.974411	1.18572	0.578017	0.628684
[truncated: 2,480 more rows]
